# Supplementary material for: The Influence of Age and Sex on Genetic Associations with Adult Body Size and Shape: A Large-Scale Genome-Wide Interaction Study
Source: PLoS Genet. 2015 Oct 1;11(10):e1005378. doi: 10.1371/journal.pgen.1005378 (PMC4591371; doi:10.1371/journal.pgen.1005378)
Supplement: S1 Table — (XLSX) [file pgen.1005378.s017.xlsx]

## Sheet: Table S1
	Study		Study design	Ethnicity	Total sample size (N)	Sample QC		Samples in analyses (N)	Anthropometric assessment method	References
	Short name	Full name				Call rate*	other exclusions
	GWAS Studies
	ADVANCE - GWAS Cases	Atherosclerotic Disease, VAscular FuNction, & GenetiC Epidemiology study	Population-based case control study of CAD	white European	275	≥ 98.5%	1) Gender discrepancies, 2) related individuals and duplicates, 3) ethnic outliers	275	measured	1) PMID 16490908 Go AS, Iribarren C, Chandra M, et al. Statin and beta-blocker therapy and the initial presentation of coronary heart disease. Ann Intern Med 2006;144:229-38. 2) PMID 16840522 Taylor-Piliae RE, Norton LC, Haskell WL, et al. Validation of a New Brief Physical Activity Survey among Men and Women Aged 60-69 Years. Am J Epidemiol 2006 3)PMID 17084253 Iribarren C, Go AS, Husson G, et a…
	ADVANCE - GWAS controls	Atherosclerotic Disease, VAscular FuNction, & GenetiC Epidemiology study	Population-based case control study of CAD	white European	311	≥ 98.5%	1) Gender discrepancies, 2) related individuals and duplicates, 3) ethnic outliers	311	measured	1) PMID 16490908 Go AS, Iribarren C, Chandra M, et al. Statin and beta-blocker therapy and the initial presentation of coronary heart disease. Ann Intern Med 2006;144:229-38. 2) PMID 16840522 Taylor-Piliae RE, Norton LC, Haskell WL, et al. Validation of a New Brief Physical Activity Survey among Men and Women Aged 60-69 Years. Am J Epidemiol 2006 3)PMID 17084253 Iribarren C, Go AS, Husson G, et a…
	AE	Athero-Express Biobank Study	patient-cohort	white European	2711	≥ 97%	1) Heterozygosity (Ĥ) ± 3 standard deviations of the mean 2) Ethnic outliers through Principal Component Analysis compared to HapMap 2 (r22) 3) Related individuals and duplicates, π>0.20 4) Missing body weight and height	681	measured	[PMID: 15678794] Verhoeven, B.A. et al. Athero-express: differential atherosclerotic plaque expression of mRNA and protein in relation to cardiovascular events and patient characteristics. Rationale and design. European Journal of Epidemiology 19(12), 1127-33 (2004). [PMID: 20720431] Hurks,R. et al. Aneurysm-express: human abdominal aortic aneurysm wall expression in relation to heterogeneity and…
	AGES-Reykjavik	Age, Gene/Environment Susceptibility-Reykjavik Study	Population-based	White European	3219	≥ 97%	1) Missing body weight and height	3207 (height 3219)	measured	Harris TB, Launer LJ, Eiriksdottir G, Kjartansson O, Jonsson PV, Sigurdsson G, Thorgeirsson G, Aspelund T, Garcia ME, Cotch MF, Hoffman HJ, Gudnason V. Age, Gene/Environment Susceptibility-Reykjavik Study: multidisciplinary applied phenomics. Am J Epidemiol. 2007 May 1;165(9):1076-87. Epub 2007 Mar 10. PubMed PMID: 17351290; PubMed Central PMCID: PMC2723948.
	Amish	Old Order Amish Study	Family-based (founder population)	white - Amish	1213	>95%	Missing phenotype or covariate data	1202	measured
	arcOGEN	Arthritis Research UK Osteoarthritis Genetics	Osteoarthritis cases	White European	7410	≥ 98%	1) Sex discrepancies 2) Heterozygosity <30.5% or >34% 3) Ethnic outliers 4) Related individuals and duplicates 5) Missing body-weight and height	3837	measured	[PMID: 22763110] Zeggini, E. et al. Identification of new susceptibility loci for osteoarthritis -the arcOGEN study. Lancet. 380, 815-23 (2012).
	ARIC	ARIC Atherosclerosis Risk in Communities Study	Population‐based		15792	≥ 90%	1) True sex/gender mismatch 2) Discordant genotype with earlier TaqMan genotyping. If >10/47 genotypes discordant ‐> exclude 3) First‐degree relative 4) PC>8SD in Eigenstrat run (10 iterations with 10 PCs) 5) Outlier based on average IBS 6) missing	9644	self-report	[PMID: 2646917] Atherosclerosis Risk in Communities (ARIC) Study: design and objectives. 1989. ARIC Investigators. Am. J. Epidemiol. 129: 687‐702.
	B58C-T1DGC	British 1958 birth cohort - T1DGC controls	Population-based	white European	2592	≥ 98%	1) Contamination 2) non-European identity 3) missing height or weight	2587	measured	PMID: 17255346 (cohort/phenotyping); PMID: 19430480 (genotyping)
	B58C-WTCCC	British 1958 birth cohort - WTCCC controls	Population-based	white European	1502	≥ 97%	1) Contamination 2) non-European identity 3) Missing height or weight	1479	measured	PMID: 17255346 (cohort/phenotyping); PMID: 17554300 (genotyping)
	BLSA	Baltimore Longitudinal Study of Aging	Population-based	white European	1230	98.5	1) ethnic outliers 2) Missing body weight and height 3) Sex mismatch	844	mesured	Shock, N.W., et al., Normal Human Aging: The Baltimore Study of Aging. 1984.: NIH Publication No. 84-2450 (http://health-equity.pitt.edu/2557/)
	B-PROOF	B-vitamins for the Prevention of Osteoporotic Fractures	RCT	Caucasian	2919	≥ 95%	1) Gender mismatches 2) Related individuals	2669	measured	[PMID: 22136481]
	BSN (BHS)	Busselton Health Study	Population-based	White European	1366	≥ 97%	1) Ethnic outliers; 2) related individuals and duplicates; 3) Ambiguous sex	1327	Measured	[PMID: 19643935] James, A.L. et al. Changes in the prevalence of asthma in adults since 1966: the Busselton Health Study. Eur Respir J 35(2), 273-8 (2010).
	CAHRES (cases)	Swedish And Singapore Breast Association Consortium	Case-control study of breast cancer	Cases	803	≥ 96%	1) related individuals and duplicates 2) ethnic outliers 3) missing body weight and height	793	self-reported	[PMID: 10209946] Magnusson, C. et al. Breast-cancer risk following long-term oestrogen- and oestrogen-progestin-replacement therapy. Int J Cancer 81, 339-44 (1999). [PMID: 17132159] Einarsdóttir, K. et al. Comprehensive analysis of the ATM, CHEK2 and ERBB2 genes in relation to breast tumour characteristics and survival: a population-based case-control and follow-up study. Breast Cancer Res 8, R67…
	CAHRES (controls)	Swedish And Singapore Breast Association Consortium	Case-control study of breast cancer	Controls	764	≥ 96%	1) related individuals and duplicates 2) ethnic outliers 3) missing body weight and height	754	self-reported	[PMID: 10209946] Magnusson, C. et al. Breast-cancer risk following long-term oestrogen- and oestrogen-progestin-replacement therapy. Int J Cancer 81, 339-44 (1999). [PMID: 17132159] Einarsdóttir, K. et al. Comprehensive analysis of the ATM, CHEK2 and ERBB2 genes in relation to breast tumour characteristics and survival: a population-based case-control and follow-up study. Breast Cancer Res 8, R67…
	CHS	The Cardiovascular Health Study	Population-based		3238	>95%	1) Prevalent clinical CVD 2) African-americans 3) Sex discordant 4) Missing body weight	3238	measured	Fried LP et al. Ann Epidemiol. 1991; 1: 263‐276
	COLAUS	Cohorte Lausannoise	Population-based	white European	6188	>90%	1) ethnic outliers 2) related individuals and duplicates 3) Missing height	5409	measured	Firmann et al. The CoLaus study: a population-based study to investigate the epidemiology and genetic determinants of cardiovascular risk factors and metabolic syndrome BMC Cardiovascular Disorders 2008, 8:6
	COROGENE cases	COROGENE-STUDY Genetic Predisposition of Coronary Heart Disease in Patients Verified with Coronary Angiogram.	Case-control	white European; Finnish	2079	≥ 95%	1) heterozygosity, gender check and relatedness checks have been performed and any discrepansies have been removed 2) Missing phenotype	1869	measured	[PMID: 21642350] Vaara, S et al. Cohort Profile: the Corogene Study. Int. J. Epidemiol. (2012) 41 (5): 1265-1271.
	COROGENE controls	COROGENE-STUDY Genetic Predisposition of Coronary Heart Disease in Patients Verified with Coronary Angiogram. CONTROLS (The FINRISK study) *Corogene controls are picked from the National FINRISK Study.	Case-control	white European; Finnish	2051	≥ 95%	1) heterozygosity, gender check and relatedness checks have been performed and any discrepansies have been removed 2) Missing phenotype	1886	measured	[PMID: 21642350] Vaara, S et al. Cohort Profile: the Corogene Study. Int. J. Epidemiol. (2012) 41 (5): 1265-1271.
	CROATIA -KORCULA	The CROATIA study, Korcula Island cohort	Population-based	white European	898	0.97	1) Ethnic outliers 2) People with missing phenotype data	881	measured	[PMID: 19260141 ] Zemunik T et al.Genome-wide association study of biochemical traits in Korcula Island, Croatia.Croat Med J. 2009 Feb;50(1):23-33 [PMID: 19260141 ]
	CROATIA-SPLIT	The CROATIA study, Split cohort	Population-based	white European	499	0.97	1) Ethnic outliers 2) people with missing phenotype data	499	measured	PMID:19260138 Rudan I. et al."10001 Dalmatians:" Croatia launches its national biobank. Croat Med J. 2009 Feb;50(1):4-6.
	CROATIA-VIS	The CROATIA study, Vis Island cohort	Population-based	white European	924	0.97	1) Ethnic outliers 2) People with missing phenotype data	910	measured	[PMID: 18327257] Vitart V. et al. SLC2A9 is a newly identified urate transporter influencing serum urate concentration, urate excretion and gout.Nat Genet. 2008 Apr;40(4):437-42
	DECODE	deCODE genetics sample set	Population-based	white European	26799	>96%	1) Missing body weight and height	26799	measured	Thorleifsson, G. et al. Genome-wide association yields new sequence variants at seven loci that associate with measures of obesity. Nat Genet. 41, 18-24 (2009).
	DESIR	Data from an Epidemiological Study on the Insulin Resistance syndrome	Population-based	white European	4993	≥ 90%	1) Missing data	3925	measured	[PMID: 8927780] Balkau B (1996) An epidemiologic survey from a network of French Health Examination Centres, (D.E.S.I.R.): epidemiologic data on the insulin resistance syndrome, Rev Epidemiol Sante Publique 44(4):373-5.
	DGI	Diabetes Genetics Initiative	case control	white European	3438	>=95%		2377	measured	[PMID: 17463246] Genome-Wide Association Analysis Identifies Loci for Type 2 Diabetes and Triglyceride Levels
	DNBC	Danish National Birth Cohort - Preterm Delivery Study	Case-control	white European	1937	≥ 95%	1) persons born outside of Scandinavia or with parents born outside of Scandinavia 2) Missing body weight and height	1802	self-reported	[PMID: 11775787] Olsen, J., et al. "The Danish National Birth Cohort--its background, structure and aim." Scandinavian journal of public health 29.4 (2001): 300. [PMCID: PMC3694399] Alleman, B., et al. "No Observed Association for Mitochondrial SNPs with Preterm Delivery and related outcomes." Pediatric Research (2012); 72: 539-544.
	EGCUT_370K	Estonian Genome Center, University of Tartu	Population-based	white, European	2439	≥ 95%	1) Related individuals and duplicates 2) Sex mismatch 3) Phenotype missing	2306	measured	[PMID: 19424496]Nelis M, Esko T, Magi R, Zimprich F, Zimprich A, et al.(2009) Genetic Structure of Europeans: A View fromtheNorth–East. PLoSONE 4(5): e5472. [PMID: 15133739] Metspalu,A. The EstonianGenome Project.DrugDevelopment Research 62, 97‐101 (2004).
	EGCUT_OMNI	Estonian Genome Center, University of Tartu	Population-based	white, European	5719	≥ 95%	1) Related individuals and duplicates 2) Sex mismatch 3) Phenotype missing	4356	measured	[PMID: 19424496]Nelis M, Esko T, Magi R, Zimprich F, Zimprich A, et al.(2009) Genetic Structure of Europeans: A View fromtheNorth–East. PLoSONE 4(5): e5472. [PMID: 15133739] Metspalu,A. The EstonianGenome Project.DrugDevelopment Research 62, 97‐101 (2004).
	EPIC-Obesity Study	European Prospective Investigation into Cancer and Nutrition - Obesity Study	Population-based	white European	2566	≥ 94%	1) heterozygosity <23% or >30%; 2) >5.0% discordance in SNP pairs with r2= 1 in HapMap; 3) ethnic outliers; 4) related individuals and duplicates; 5) Missing body weight and height.	2415	measured	[PMID: 10466767] Day,N.E. et al. EPIC-Norfolk: study design and characteristics of the cohort. European Prospective Investigation of Cancer. British Journal of Cancer 80, 95-103 (1999).
	ERF	Erasmus Rucphen Family Study	Family based cohort	Western European	3237	≥ 95%	1) missing DNA 2) gender mismatch with typed X-linked markers 3) excess autosomal heterozygosity 4) duplicates and related individuals 5) ethnic outliers using IBS distances > 4SD from PLINK 6) Missing body weight and height	2720	measured	[PMID:15054401] Aulchenko YS, Heutink P, Mackay I, Bertoli-Avella AM, Pullen J, et al. (2004) Linkage disequilibrium in young genetically isolated Dutch population. Eur J Hum Genet 12: 527-534.
	FamHS	Family Heart Study	Population-based	white European	3749	≥ 98%	1) SNPs were delected if detected Mendelian errors 2) Missing body weight and height	3594	measured	[PMID: 8651220] Higgins M, et.al. NHLBI Family Heart Study: objectives and design. Am J Epidemiol. 143,1219-28 (1996).
	FENLAND	Fenland Study	Population-based	white European	1500	≥ 95%	1) heterozygosity <27.3% or >28.8% 2) duplicate check 3) relatedness check	1402	measured	[PMID: 20519560] Rolfe Ede L, Loos RJ, Druet C, Stolk RP, Ekelund U, Griffin SJ, Forouhi NG, Wareham NJ, Ong KK. Association between birth weight and visceral fat in adults. Am J Clin Nutr 2010;92:347-52.
	FinGesture	Finnish Genetic Study of Arrhythmic Events	Sudden cardiac death and myocardial infarction cases	white European (Finland)	1039	>95%	1) Ethnic Outliers 2) Related individuals and duplicates 3) Missing body weight and height	963	measured	[PMID: 17000909] Kaikkonen KS, Kortelainen ML, Linna E, Huikuri HV (2006) Family history and the risk of sudden cardiac death as a manifestation of an acute coronary event. Circulation 114: 1462–1467. [PMID: 12932596] Huikuri HV, Tapanainen JM, Lindgren K, Raatikainen P, Makikallio TH, et al. (2003) Prediction of sudden cardiac death after myocardial infarction in the beta-blocking era. J Am Coll…
	FRAMHS	Framingham Heart Study	Population -based, multi-generaional	white EA Americans	8481	> 97%	1) High Mendelian Error Rate, 2) High Heterozygosity, 3) Missing BMI	8269	measured	[PMID 14025561], [PMID 1208363], [PMID 17372189] (1) DAWBER TR, KANNEL WB, LYELL LP. An approach to longitudinal studies in a community: the Framingham Study. Ann N Y Acad Sci. 1963;107:539-556. PMID 14025561 (2) Feinleib M, KANNEL WB, Garrison RJ, McNamara PM, Castelli WP. The Framingham Offspring Study. Design and preliminary data. Prev Med. 1975;4:518-525. PMID 1208363 (3) Splansky GL, Corey D…
	FUSION controls	Finland-United States Investigation of NIDDM Genetics	Case-control	European	1161	> 97.5%	1) Related individuals 2) Missing BMI	1092	measured	[PMID: 17463248] Scott,LJ et al. A genome-wide association study of type 2 diabetes in Finns detects multiple susceptibility variants. Science 316(5829):1341-5 (2007).
	FUSION T2D cases	Finland-United States Investigation of NIDDM Genetics	Case-control	European	1174	> 97.5%	1) Related individuals 2) Missing BMI	1171	measured	[PMID: 17463248] Scott,LJ et al. A genome-wide association study of type 2 diabetes in Finns detects multiple susceptibility variants. Science 316(5829):1341-5 (2007).
	GASP-1 (cases)	Cancer Prostate in Sweden 1	Case-control study of prostate cancer	Cases	505	> 95%	1) related individuals and duplicates 2) ethnic outliers 3) missing body weight and height	483	self-reported	[PMID: 18073375] Duggan D, et al. Two genome-wide association studies of aggressive prostate cancer implicate putative prostate tumor suppressor gene DAB2IP. J Natl Cancer Inst 2007 Dec 19;99(24):1836-44 (2007).
	GASP-1 (controls)	Cancer Prostate in Sweden 1	Case-control study of prostate cancer	Controls	506	> 95%	1) related individuals and duplicates 2) ethnic outliers 3) missing body weight and height	477	self-reported	[PMID: 18073375] Duggan D, et al. Two genome-wide association studies of aggressive prostate cancer implicate putative prostate tumor suppressor gene DAB2IP. J Natl Cancer Inst 2007 Dec 19;99(24):1836-44 (2007).
	GASP-2 (cases)	Cancer Prostate in Sweden 2	Case-control study of prostate cancer	Cases	1483	> 95%	1) related individuals and duplicates 2) ethnic outliers 3) missing body weight and height	1414	self-reported	[PMID: 18073375] Duggan D, et al. Two genome-wide association studies of aggressive prostate cancer implicate putative prostate tumor suppressor gene DAB2IP. J Natl Cancer Inst 2007 Dec 19;99(24):1836-44 (2007).
	GASP-2 (controls)	Cancer Prostate in Sweden 2	Case-control study of prostate cancer	Controls	519	> 95%	1) related individuals and duplicates 2) ethnic outliers 3) missing body weight and height	499	self-reported	[PMID: 18073375] Duggan D, et al. Two genome-wide association studies of aggressive prostate cancer implicate putative prostate tumor suppressor gene DAB2IP. J Natl Cancer Inst 2007 Dec 19;99(24):1836-44 (2007).
	GENDIAN	Genetics of Diabetic Nephropathy	case control study of ESRD in type 2 diabetes	Caucasian	1026	≥ 95%	1) Relatedness and duplicates 2) Gender mismatch 3) Callrate check 4) Ethnicity check 5) Exclude dialysis patients for BMI & WHRadjBMI 6) Missing age, sex, BMI, height,WHR	449 (BMI), 309 (WHRadjBMI) 901 (height)	measured	PMID 16961167; Böger CA et al: effect of ACE and AT-2 inhibitors on mortality and progression to microalbuminuria in a nested case control study of diabetic nephropathy in diabetes mellitus type 2: results from the GENDIAN study. Int J Clin Pharmacol Ther 2006;44:364-74. [PMID: 21980298]; Böger CA et al. Association of eGFR-related loci identified by GWAS with incident CKD and ESRD. Plos Genet 20…
	GEOS	Genetics of Early-Onset Stroke	Case-control	European ancestry	946	≥ 98%	1) Exclude unexpected duplicates 2) gender discrepancy 3) unexpected relatedness	946	self-report	[PMID:22384361 ] Cheng Y-C et al. Genome-wide association analysis of ischemic stroke in young adults. G3: Genes, Genomes, Genetics. 2011;1:505-514
	GerMIFS I	German Myocardial Infarction Familiy Study I	population based	Caucasian (white Europeans)	2519	≥0.97	1) Heterozygosity <23% or >30% 2) Related individuals and duplicates 3) Missing phenotype (body weight and height)	604	measured	[PMID: 17634449] Samani, N. J., J. Erdmann, et al. (2007). "Genomewide association analysis of coronary artery disease." N Engl J Med 357(5): 443-453.
	GerMIFS II	German Myocardial Infarction Familiy Study II	population based	Caucasian (white Europeans)	2520	≥0.98	1) Heterozygosity <23% or >30% 2) Related individuals and duplicates 3) Missing phenotype (body weight and height)	387	measured	[PMID: 19198612] Erdmann, J., A. Grosshennig, et al. (2009). "New susceptibility locus for coronary artery disease on chromosome 3q22.3." Nat Genet 41(3): 280-282.
	GOOD	Gothenburg Osteoporosis and Obesity Determinants Study	Population-based	Caucasian	1056	≥ 97.5%	1) Heterozygosity > 33% 2) Ethnic outliers 3) Related individuals and duplicates 4) Missing WHR	937	measured	[PMID: 16007330] Lorentzon, M. et al Free testosterone is a positive whereas free estradiol is a negative predictor of cortical bone size in young Swedish men-The GOOD Study. J Bone Miner Res 20, 1334-1341 (2005).
	GOYA male	Genetics of Overweight Young Adults	Case-cohort	white European		>=95%	1)Duplicates 2) Gender discrepancy 3)Related and duplicates	1714	measured	PMID:21935397
	H2000 cases	The Health 2000 Survey cases	case-control	White European: Finnish	1022	≥ 95%	1) Heterozygosity 2) Gender check 3) Relatedness checks 4) Missing phenotype	824	measured	http://www.terveys2000.fi/indexe.html HEALTH AND FUNCTIONAL CAPACITY IN FINLAND, Baseline Results of the Health 2000 Health Examination Survey. In: Aromaa A, Koskinen S, eds. Vol KTL B12/2004. Helsinki: National Public Health Institute; 2004. Available in http://www.terveys2000.fi/julkaisut/baseline.pdf. Pajunen P, Rissanen H, Härkänen T, Jula A, Reunanen A, Salomaa V. The metabolic syndrome as a…
	H2000 controls	The Health 2000 Survey controls	case-control	White European: Finnish	1081	≥ 95%	1) Heterozygosity 2) Gender check 3) Relatedness checks 4) Missing phenotype	828	measured	http://www.terveys2000.fi/indexe.html HEALTH AND FUNCTIONAL CAPACITY IN FINLAND, Baseline Results of the Health 2000 Health Examination Survey. In: Aromaa A, Koskinen S, eds. Vol KTL B12/2004. Helsinki: National Public Health Institute; 2004. Available in http://www.terveys2000.fi/julkaisut/baseline.pdf. Pajunen P, Rissanen H, Härkänen T, Jula A, Reunanen A, Salomaa V. The metabolic syndrome as a…
	HBCS	Helsinki Birth Cohort Study	Birth-cohort	white European: Finnish	1 872	≥ 95%	1)SNP clustering probability for each genotype > 95% 2) Call rate > 95% both individuals and markers 3) MAF > 1% 4) HWE p > 1*10-6 5) Heterozygosity 6) Gender check 7) Relatedness checks 8) Missing phenotype	1591	measured	[PMID: 16881894] Eriksson, J.G. Early growth and adult health outcomes -- lessons learned from the Helsinki Birth Cohort Study. Matern Child Nutr. 2005 Jul;149-54. Review.
	HELIC-HA	Hellenic Isolated Cohorts MANOLIS	Isolated population	European descent, Greece.	1143	≥98%	Sexcheck, heterozygosity -visual outliers excluded, ethnic outlies, duplicates excluded(PI_HAT > 0.9)	678	measured	-
	HELIC-HP	Hellenic Isolated Cohorts Pomak	Isolated population	European descent, Greece.	743	≥98%	Sexcheck, heterozygosity -visual outliers excluded, ethnic outlies, duplicates excluded(PI_HAT > 0.9)	915	measured	-
	HERITAGE Family Study	Health, Risk Factors, Training and Genetics (HERITAGE) Family Study	Family Study, baseline data from an exercise training intervention	white European	500	>99%	NA	500	Measured	Bouchard C, Leon AS, Rao DC, Skinner JS, Wilmore JH and Gagnon J. The HERITAGE Family Study: Aims, design, and measurement protocol. Medicine and Science in Sports and Exercise 27:721-729, 1995 Bouchard C, Sarzynski MA, Rice T, Kraus W, Church T, Sung YJ, Rao DC, Rankinen T. Genomic predictors of maximal oxygen uptake response to standardized exercise training programs. Journal of Applied Physiol…
	HYPERGENES controls	HYPERGENES	Case-control	white European	1934	>90%	1) ethnic outliers 2) Missing phenotypes	1838	measured	[PMID: 22184326]
	HYPERGENES cases	HYPERGENES	Case-control	white European	2124	>90%	1) ethnic outliers 2) Missing phenotypes	1787	measured	[PMID: 22184326]
	InCHIANTI	Invecchiare in Chianti	Population based	white European	1230	≥ 97%	1) heterozygosity >30% 2) ethnic outliers 3) duplicates 4) Missing body weight and height	1106	measured	[PMID: 11129752] Ferrucci, L., et al., Subsystems contributing to the decline in ability to walk: bridging the gap between epidemiology and geriatric practice in the InCHIANTI study. J Am Geriatr Soc, 2000. 48(12): p. 1618-25.
	JoCo	Johnston County Osteoarthritis Project	Population-based	white European and black African American	2583	0.98	1) Sex/gender mismatch 2) First-degree relative 3) Disagreement between reported and genotypic race 4) Missing height and/or weight or other covariate	1488	measured	[PMID: 17216685] Joanne M Jordan, Charles G Helmick, Jordan B Renner, Gheorghe Luta, Anca D Dragomir, Janice Woodard, Fang Fang, Todd A Schwartz, Lauren M Abbate, leigh F Callahan, William D Kalsbeek and Marc C Hochberg (2007) Prevalence of knee symptoms and radiographic and symptomatic knee osteoarthritis in African Americans and Caucasians: the Johnston County Osteoarthritis Project. J Rheumato…
	KORA S3	Cooperative Health Research in the Region of Augsburg	Population-based	white European	1644	≥ 93%	1) no german passport 2) missing phenotye	1644	measured	[PMID: 16032514] Wichmann HE et al. KORA-gen--resource for population genetics, controls and a broad spectrum of disease phenotypes. Gesundheitswesen 67 Suppl 1, S26-30 (2005).
	KORA S4	Cooperative Health Research in the Region of Augsburg	Population-based	white European	1814	≥ 93%	1) no german passport 2) missing phenotye	1814	measured	[PMID: 16032514] Wichmann HE et al. KORA-gen--resource for population genetics, controls and a broad spectrum of disease phenotypes. Gesundheitswesen 67 Suppl 1, S26-30 (2005).
	LifeLines	LifeLines Cohort study	Population-based	white European	9480	≥ 95%	1) heterozygosity >4SD from mean 2) ethnic outliers 3) related individuals and duplicates 4) sex mismatch with database 5) Missing age, sex, BMI	8121	measured	[PMID:18075776] Stolk, R.P. Universal risk factors for multifactorial diseases: LifeLines: a three-generation population-based study. Eur J Epidemiol. 23(1):67-74 (2008)
	LOLIPOP_EW_A	London Life Sciences Prospective Population Study	population-based	White European	878	0.95	1) Duplicates 2) Contaminated samples 3) Relatedness 4) Samples already in EW610	513	measured	[PMID:18940312] Yuan X, Waterworth D, Perry JR, et al. Population-based genome-wide association studies reveal six loci influencing plasma levels of liver enzymes. Am J Hum Genet 2008, 83:520-528
	LOLIPOP_EW_P	London Life Sciences Prospective Population Study	population-based	White European	1006	0.95	1) Duplicates 2) Contaminated samples 3) Samples already in EW610	651	measured	[PMID:18193046] Kooner JS, Chambers JC, Aguilar-Salinas CA, et al. Genome-wide scan identifies variation in MLXIPL associated with plasma triglycerides. Nat Genet 2008, 40:149-151.
	LOLIPOP_EW610	London Life Sciences Prospective Population Study	population-based	White European	945	0.95	1) Duplicates 2) Gender discrepancy 3) Contaminated samples 4) Relatedness	927	measured	[PMID:21909110] Wain LV,Verwoert GC, O'Reilly PF, et al. Genome-wide association study identifies six new loci influencing pulse pressure and mean arterial pressure. Nat Genet 2001, 43:1005-1011. 2. International Consortium for Blood Pressure Genome-Wide Association Studies, et al. Genetic Variants in novel pathways influence blood pressure and cardiovascular disease risk. Nature 2011, 478:103-10…
	LURIC - Cases	Ludwigshafen Risk and Cardiovascular Health Study	Case-control	white European		> 90%	1) Related individuals and duplicates 2) Samples with ambigous sex	2419	measured	PMID: 11258203
	LURIC - Controls	Ludwigshafen Risk and Cardiovascular Health Study	Case-control	white European		> 90%	1) Related individuals and duplicates 2) Samples with ambigous sex	642	measured	PMID: 11258203
	MAP	Rush Memory and Aging Project	Longitudinal Cohort Study	Whites with European Ancenstry	891 (only a subset of the cohort)	0.95	1) Genotype-derived gender discordant with reported gender 2) Inbreeding coefficient F>0.04 3) Missing phenotypes	866	measured	Bennett DA, Schneider JA, Buchman AS, Barnes LL, Boyle PA, Wilson RS.Overview and findings from the rush memory and aging project.Curr Alzheimer Res. 2012 Jul 1;9(6):646-63
	MGS	Molecular Genetics of Schizophrenia/NIMH Repository Control Sample	Population-based (survey research method)	white European descent	2681	0.997	1) Call rate < 97% for samples,95% for SNPs 2) Heterozygosity <26% or >28.5% 3) Excess duplicate discordancies or mendelian errors (SNPs) 4) Ethnic outliers (principal component scores) 5) Related individuals and duplicates 6) Missing body weight or height	2597	self-report	[PMID: 19571809] Shi, J, et al. Common variants on chromosome 6p22.1 are associated with schizophrenia. Nature. 2009 Aug 6;460(7256):753-7. [PMID: 18198266] Sanders, A.R. No significant association of 14 candidate genes with schizophrenia in a large European ancestry sample: implications for psychiatric genetics. Am J Psychiatry. 2008 Apr;165(4):497-506.
	MICROS		Population-based	White European	1268	≥ 97%	1) Ethnic Outliers 2) Missing phenotype data	1163	measured
	MIGen	Myocardial Infarction Genetics Consortium	case-control	white European	6042	≥ 95%		2646	measured	[PMID: 19198609] Kathiresan S. et al. Genome-wide association of early-onset myocardial infarction with single nucleotide polymorphisms and copy number variants. Nat Genet. 41(3), 334-41 (2009).
	Mount Sinai BioMe	The Charles Bronfman Institute for Personalized Medicine; BioMe Program	Hospital-based	Europeans	703	≥ 95%	1) heterozygosity (Z-value > |6|) 2) Gender mismatch errors 3) ethnic outliers 4) First degree relatives and duplicates 5) Missing body weight, height, or BMI (then excluded only from that group)	643	measured	1. Tayo BO, Teil M, Tong L, Qin H, Khitrov G, Zhang W, Song Q, Gottesman O, Zhu X, Pereira AC, Cooper RS, Bottinger EP. Genetic background of patients from a university medical center in Manhattan: implications for personalized medicine. (PMID:21573225)
	NBS	Nijmegen Biomedical Study	Population-based	Caucasian	1980	>98%	1) <90% Caucasian admixture	1832	questionnaire	[PMID: 16254196] Hoogendoorn EH et al. Thyroid function and prevalence of anti-thyroperoxidase antibodies in a population with borderline sufficient iodine intake: influences of age and sex. Clin Chem 2006;52:104-11. [PMID: 18794855] Kiemeney LA et al. Sequence variant on 8q24 confers susceptibility to urinary bladder cancer. Nat Genet 2008;40:1307-12.
	NELSON	Dutch and Belgian Lung Cancer Screening Trial	Current and former heavy smokers	White European	3082	≥ 98%	1) heterozygosity > 2d from mean 2) ethnic outliers 4) related individuals (r2>0.2) and duplicates 5) Missing height or BMI	1135	measured	1) PMID: 17131307 van Iersel CA et al. Risk-based selection from the general population in a screening trial: selection criteria, recruitment and power for the Dutch-Belgian randomised lung cancer multi-slice CT screening trial (NELSON). Int J Cancer 2007;120:868e74. 2) PMID: 23561647 van Setten J, et al., Genome-wide association study of coronary and aortic calcification implicates risk loci for…
	NFBC66	Northern Finland Birth Cohorts 1966	Population‐based	white European	5654	≥ 95%	1) gender discrepancy with genetic data from X‐linked markers 2) withdrawn consent 3) duplicates and first and second degree relatives 4) contaminated samples	4501	measured	[PMID: 19060910 ] Sabatti, C. et al. Genome‐wide association analysis of metabolic traits in a birth cohort from a founder population. Nat Genet (2008).
	NHS	The Nurses' Health Study	Cohort	white European	2265	≥ 98%	1) Low genotying completion (<90%) 2) Unclear identity and admixed origin 3) Missing BMI, height	2265	self reported	PMID:20418489 QI L. et al. Hum Mol Genet. 2010 Jul 1;19(13):2706-15.
	NSPHS	Northern Sweden Population Health Study (EUROSPAN)	Population-based	white European	720	≥ 97%	1) ethnic outliers 2) duplicates 3) Missing body weight and height	656	measured	[PMID: 18952825 Johansson A. et al. Common variants in the JAZF1 gene associated with height identified by linkage and genome-wide association analysis. Hum Mol Genet. 18(2), 373-80 (2009)
	NTR-NESDA	The Netherlands Twin Register and the Netherlands Study for Anxiety and Depression	Case-control	white European	3540	>90%	1) Contamination 2) Cryptic relatedness and ethnic outliers 3) Gender mismatch 4) Missing body weight and height		questionnaire and measured	[PMID:19065144] Sullivan PF et al. Genome-wide association for major depressive disorder: a possible role for the presynaptic protein piccolo. Mol Psychiatry. 14:650-2 (2009). [PMID:2047772] Willemsen et al. The Netherlands Twin Register biobank: a resource for genetic epidemiological studies. Twin Res Hum Genet. 13:231-45 (2010).
	ORCADES	Orkney Complex Disease Study	Population-based	white European	875	0.97	1) Ethnic outliers 2) people with missing phenotype data	872	measured	[PMID: 18760389] McQuillan R, et al. Runs of homozygosity in European populations. Am J Hum Genet. 2008 Sep;83(3):359-72
	PIVUS	The Prospective Investigation of the Vasculature in Uppsala Seniors	Population-based	White European	1016	≥ 95%	1) Heterozygosity >3 SD 2) Gender discordance 3) Ethnic outliers 4) Related individuals and duplicates	949	measured	[PMID: 16141402] Lind, L. et al. A comparison of three different methods to evaluate endothelium-dependent vasodilation in the elderly: the Prospective Investigation of the Vasculature in Uppsala Seniors (PIVUS) study. Arterioscler Thromb Vasc Biol 25, 2368-75 (2005).
	PLCO	Prostate, Lung, Colorectal, and Ovarian Cancer Screening Trial	Population-based case-control	Caucasian	2277	≥ 90%	1) Sex discordance with genetic data 2) Heterozygosity 3) Ancestry outliers 4) Related individuals and duplicates 5) Missing phenotype data, BMI/height > 4 SD from mean	2235	self-report	[PMID: 17401363] Yeager M, et al. Genome-wide association study of prostate cancer identifies a second risk locus at 8q24. Nat Genet 2007;39:645-9.
	PLCO2	Prostate, Lung, Colorectal, and Ovarian Cancer Screening Trial	Population-based case-control	Caucasian	4219	>98%	1) Sex discordance with genetic data 2) Heterozygosity 3) Ancestry outliers 4) Related individuals and duplicates 5) Missing phenotype data	4162	self-report	[PMID: 21490707] Cornelis MC, et al. Genome-wide meta-analysis identifies regions on 7p21 (AHR) and 15q24 (CYP1A2) as determinants of habitual caffeine consumption. PLoS Genet. 2011 Apr;7(4):e1002033.
	PREVEND	Prevention of renal and vascular end-stage disease	Population-based	white European	3649	≥ 95%	1) Related individuals 2) Sample outliers based on 16,842 independent SNPs; samples were excluded when Z-score > 3 on the first 5 PCA's 3) Sex inconsistencies	3624	measured	PMID 12356629
	PROCARDIS	Precocious Coronary Artery Disease	Population-based	white European	13000	≥ 95%	1) Ethnic outliers 2) Missing body weight and height.	7300	measured	[PMID: 21378988], [PMID: 18048406]
	PROSPER/PHASE	The PROspective study of Pravastatin in the Elderly at Risk for vascular disease	Randomized controlled trial	White European	5.784	≥ 97.5%	1) Heterozygosity 2) Ethnic outliers 3) related individuals and duplicates;	5244	measured	1) Shepherd J, Blauw GJ, Murphy MB, Cobbe SM, Bollen EL, Buckley BM, et al. The design of a prospective study of Pravastatin in the Elderly at Risk (PROSPER). PROSPER Study Group. PROspective Study of Pravastatin in the Elderly at Risk. Am J Cardiol 1999 Nov 15;84(10):1192-7. 2) Shepherd J, Blauw GJ, Murphy MB, Bollen EL, Buckley BM, Cobbe SM, et al. Pravastatin in elderly individuals at risk of …	Tönjes A et al. Eur J Hum Genet. 2010 Jan;18(1):104‐10
	QFS	Quebec Family Study		White, French-Canadian	951	≥ 95%	NA	860	measured	[PMID: 3391737] Bouchard et al., Inheritance of the amount and distribution of human body fat. International Journal of Obesity 12, 205-215 (1988).
	QIMR	Twin study at Queensland Instutite of Medical Rearch	Population-based	whit European	11930	≥ 95%	1) Age < 18 2) Ethnic outliers 3) Related individuals and duplicates 4) Missing body weight and height	3627	measured or self-reported	[PMID: 19896111] Medland, 2009 Common Variants in the Trichohyalin Gene Are Associated with Straight Hair in Europeans.
	RISC	Relationship between Insulin Sensitivity and Cardiovascular disease Study	Population-based	white European	1566	>95%	1) Non-European Descent 2) Sex mismatches	1031	measured	[PMID:14968294] Hills, S.A. et. al, The EGIR-RISC STUDY (The European group for the study of insulin resistance: relationship between insulin sensitivity and cardiovascular disease risk): I. Methodology and objectives, Diabetologia, 47, 556-570 (2004)
	ROS	Religious Orders Study	Longitudinal Cohort Study	Whites with European Ancenstry	817 (only a subset of the cohort)	0.95	1) Genotype-derived gender discordant with reported gender 2) Inbreeding coefficient F>0.04 3) Missing phenotypes	798	measured	Bennett DA, Schneider JA, Arvanitakis Z, Wilson RS. Overview and findings from the religious orders study. Curr Alzheimer Res. 2012 Jul 1;9(6):628-45.
	RS-I (ERGO)	Rotterdam Study - I		North-western European	5794	≥ 95%	1) missing DNA 2) gender mismatch with typed X-linked markers 3) excess autosomal heterozygosity 4) duplicates and related individuals 5) ethnic outliers using IBS distances > 4SD from PLINK 6) Missing body weight and height	5794	measured	[PMID: 11753597] {Visscher, 2001 A comparison of body mass index, waist-hip ratio and waist circumference as predictors of all-cause mortality among the elderly: the Rotterdam study}; [PMID:19700477] {Estrada, 2009 GRIMP: a web- and grid-based tool for high-speed analysis of large-scale genome-wide association using imputed data}; [PMID:21877163] {Hofman, 2011 The Rotterdam Study: 2012 objectives…
	RS-II	Rotterdam Study - II		North-western European	2157	≥ 95%	1) missing DNA 2) gender mismatch with typed X-linked markers 3) excess autosomal heterozygosity 4) duplicates and related individuals 5) ethnic outliers using IBS distances > 4SD from PLINK 6) Missing body weight and height	2157	measured	[PMID: 11753597] {Visscher, 2001 A comparison of body mass index, waist-hip ratio and waist circumference as predictors of all-cause mortality among the elderly: the Rotterdam study}; [PMID:19700477] {Estrada, 2009 GRIMP: a web- and grid-based tool for high-speed analysis of large-scale genome-wide association using imputed data}; [PMID:21877163] {Hofman, 2011 The Rotterdam Study: 2012 objectives…
	RS-III	Rotterdam Study - III		North-western European	3932	≥ 95%	1) missing DNA 2) gender mismatch with typed X-linked markers 3) excess autosomal heterozygosity 4) duplicates and related individuals 5) ethnic outliers using IBS distances > 4SD from PLINK 6) Missing body weight and height	3932	measured	[PMID: 11753597] {Visscher, 2001 A comparison of body mass index, waist-hip ratio and waist circumference as predictors of all-cause mortality among the elderly: the Rotterdam study}; [PMID:19700477] {Estrada, 2009 GRIMP: a web- and grid-based tool for high-speed analysis of large-scale genome-wide association using imputed data}; [PMID:21877163] {Hofman, 2011 The Rotterdam Study: 2012 objectives…
	SardiNIA	SardiNIA Study on Aging	Population-based	White European	4257	> 98%	None	4257	measured	[PMID: 18193045] Sanna, Jackson et al. Common variants in the GDF5-UQCC region are associated with variation in the human height. Nature Genetics 2008 Feb;40(2):198-203
	SEARCH	UK Studies of Epidemiology and Risk Factors in Cancer Heredity	Case-control	White European	1710	≥95%	1) Ethnic outliers 2) Duplicates 3) Missing body weight and height	1556	Self-assessed	[PMID: 19648919] H. Song, S. J. Ramus, J. Tyrer et al. A genome-wide association study identifies a new ovarian cancer susceptibility locus on 9p22.2. Nature Genetics, 41, p996-1000, (2009).
	SHIP	Study of Health in Pomerania	Population-based	white European	4308	≥ 92%	1) Duplicate samples (by estimated IBD) 2) Reported/genotyped gender mismatch	4070	measured	[PMID: 20167617] Völzke, H. et al. Cohort profile: the study of health in Pomerania.
	SHIP-TREND	Study of Health in Pomerania - TREND	Population-based	white European	997	≥ 94%	1) Duplicate samples (by estimated IBD) 2) Reported/genotyped gender mismatch	986	measured	[PMID: 20167617] Völzke, H. et al. Cohort profile: the study of health in Pomerania.
	SORBS	Sorbs are self‐contained population from Eastern Germany, European Descent	Population‐based	white European	1097	≥ 94%	1) gender mismatch; 2) ethnic outliers; 3) duplicates; 4) Missing body weight and height.	903	measured	Tönjes A et al. Eur J Hum Genet. 2010 Jan;18(1):104‐10
	T2D-WTCCC	WTCCC Type 2 Diabetes cases	case series	white European	1999	≥ 97%	1) heterozygosity <23% or >30%; 2) discrepancy with external identifying information; 3) ethnic outliers; 4) related individuals and duplicates; 2) withdrawn consent;3) duplicates and first and second degree relatives; 4) contaminated samples	1903	measured	[PMID: 17554300] The Wellcome Trust Case Control Consortium Genome-wide association study of 14,000 cases of seven common diseases and 3,000 shared controls. Nature (2007) 447: 661-678
	THISEAS	The Hellenic study of Interactions between Snps and Eating in Atherosclerosis Susceptibility	CAD case-control	European	1022	0.95	1) Heterozygosity 2) Ethnic outliers 3) Duplicates 4) Missing phenotypes	799	measured	[PMID 20167083]
	TRAILS	Tracking Adolescents' Individual Lives Survey	Population-based (measured at 18yrs of age)	white European	1491	≥ 95%	1) Heterozygosity >4SD from mean 2) Ethnic outliers 3) Related individuals and duplicates 4) Sex mismatch with database 5) Missing BMI, sex, or age	1162	measured	[PMID: 18263649] Huisman et al. 2008. Cohort profile: the Dutch 'TRacking Adolescents' Individual Lives Survey'; TRAILS. International Journal of Epidemiology 2008;37:1227–1235
	TWINGENE	TWINGENE	Population-based	white European	9836	≥ 97%	1) Heterozygosity, (F-mean(F))/sd(Z) ≥ 5 2) Sex-check based on the heterozygosity rates on the X-chromosome 3) Missing phenotypes used in analysis	9176	measured	[PMID: 8981957] Hong Y, Pedersen NL, Brismar K, de Faire U. Genetic and environmental architecture of the features of the insulin-resistance syndrome. The American Journal of Human Genetics 1997 Jan;60(1):143-52.
	TwinsUK	TwinsUK	Twins Study	white European	5654	≥ 98%	1) Heterozygosity ≥2 s.d. from the sample mean 2) Ethnic outliers 3) Related individuals and duplicates 4) Missing body weight and height	2204	measured	[PMID: 22253318] Moayyeri, A. et al. Cohort Profile: TwinsUK and healthy ageing twin study. Int J Epidemiol. 42, 76-85 (2013)
	ULSAM	The Uppsala Longitudinal Study of Adult Men	Population-based	White European	1221	≥ 95%	1) Heterozygosity >3 SD 2) Gender discordance 3) Ethnic outliers 4) Related individuals and duplicates	1116	measured	[PMID: 16030278] Ingelsson, E. et al. Insulin resistance and risk of congestive heart failure. JAMA 20, 334-41 (2005).
	WGHS	Women's Genome Health Study	Population-based	white European	23294	≥ 98%	1) Ethnic outliers by MDS analysis in PLINK 2) Missing body weight and height	23294	self-report	[PMID: 18070814] Ridker PM, Chasman DI, Zee RY, Parker A, Rose L, Cook NR, Buring JE; Women's Genome Health Study Working Group. Rationale, design, and methodology of the Women's Genome Health Study: a genome-wide association study of more than 25,000 initially healthy american women. Clin Chem. 2008 Feb;54(2):249-55.
	YFS	The Cardiovascular Risk in Young Finns Study	Population-based	White European: Finnish	2556	≥ 95%	1) SNP clustering probability for each genotype > 95% 2) Call rate > 95% both individuals and markers 3) MAF > 1% 4) HWE p > 1*10-6 5) Heterozygosity, gender check and relatedness checks have been performed and any discrebansies have been removed 6) Missing phenotype	1982	measured	[PMID: 18263651] Cohort profile: the cardiovascular risk in Young Finns Study. Raitakari OT, Juonala M, Rönnemaa T, Keltikangas-Järvinen L, Räsänen L, Pietikäinen M, Hutri-Kähönen N, Taittonen L, Jokinen E, Marniemi J, Jula A, Telama R, Kähönen M, Lehtimäki T, Akerblom HK, Viikari JS.Int J Epidemiol. 2008 Dec;37(6):1220-6.
	Meatabochip Studies
	AMC-PAS	Academic Medical Centre Amsterdam Premature Atherosclerosis Study	CAD cases	European	706	0.95	1) Heterozygosity 2) Ethnic outliers 3) Duplicates 4) Missing phenotypes	490	measured	19164808
	CARDIOGENICS	CARDIOGENICS	CAD case-control	European	806	0.95	1) Heterozygosity 2) Ethnic outliers 3) Duplicates 4) Missing phenotypes	756	measured	17634449
	D2D 2007a	FIN-D2D study, 2007 cohort	Population-based	Finnish	2720	≥ 98.15%	1) Missing BMI, age, age<18. 2) Gender discrepancy or anomaly 3) Unexplained duplicate sample	2688	measured	[PMID: 20459722] Kotronen A, Yki-Järvinen H, Männistö S, Saarikoski L, Korpi-Hyövälti E, Oksa H, Saltevo J, Saaristo T, Sundvall J, Tuomilehto J, Peltonen M. Non-alcoholic and alcoholic Fatty Liver Disease – two Diseases of Affluence associated with the Metabolic Syndrome and Type 2 Diabetes: the FIN-D2D Survey. BMC Public Health 2010; 10: 237.
	DESIR	Data from an Epidemiological Study on the Insulin Resistance syndrome	Population-based	white European	4993	≥ 90%	1) Missing data	3925	measured	[PMID: 8927780] Balkau B (1996) An epidemiologic survey from a network of French Health Examination Centres, (D.E.S.I.R.): epidemiologic data on the insulin resistance syndrome, Rev Epidemiol Sante Publique 44(4):373-5.
	DIAGEN	The DIAbetes GENetics Study	Clinical prevention study	German	1535	≥ 98.15%	1) Missing BMI, age, age<18. 2) Gender discrepancy or anomaly 3) Unexplained duplicate sample	1462	measured	[PMID:16801592] Schwarz PE, Towers GW, Fischer S, Govindarajalu S, Schulze J, Bornstein SR, Hanefeld M, Vasseur F. Hypoadiponectinemia is associated with progression toward type 2 diabetes and genetic variation in the ADIPOQ gene promoter. Diabetes Care. 2006 Jul;29(7):1645-50
	DPSa	Diabetes Prevention Study	Population-based	Finnish	522	≥ 98.15%	1) Missing BMI, age, age<18. 2) Gender discrepancy or anomaly 3) Unexplained duplicate sample	472	measured	[PMID: 11333990] Tuomilehto J, Lindström J, Eriksson JG, Valle TT, Hämäläinen H, Ilanne-Parikka P, Keinänen-Kiukaanniemi S, Laakso M, Louheranta A, Rastas M, Salminen V, Uusitupa M, for the Finnish Diabetes Prevention Study Group. Prevention of Type 2 Diabetes Mellitus by Changes in Lifestyle among Subjects with Impaired Glucose Tolerance. N Engl J Med 2001; 344: 1343-1350.
	DR'S EXTRAa	DR'S EXTRA	Population-based	Finnish	1408	≥ 98.15%	1) Missing BMI, age, age<18. 2) Gender discrepancy or anomaly 3) Unexplained duplicate sample	1295	measured	[PMID: 21186108] Diet, fitness and metabolic syndrome - The DR's EXTRA Study. Kouki R, Schwab U, Lakka TA, Hassinen M, Savonen K, Komulainen P, Krachler B, Rauramaa R. Nutr Metab Cardiovasc Dis. 2010 Dec 24.
	EGCUT_METABOCHIP_NOT_T2D	Estonian Genome Center, University of Tartu	Population-based	white, European	1564	≥ 95%	1) Related individuals and duplicates 2) Sex mismatch 3) Phenotype missing	1551	measured	[PMID: 19424496]Nelis M, Esko T, Magi R, Zimprich F, Zimprich A, et al.(2009) Genetic Structure of Europeans: A View fromtheNorth–East. PLoSONE 4(5): e5472. [PMID: 15133739] Metspalu,A. The EstonianGenome Project.DrugDevelopment Research 62, 97‐101 (2004).
	EGCUT_METABOCHIP_T2D	Estonian Genome Center, University of Tartu	Population-based	white, European	959	≥ 95%	1) Related individuals and duplicates 2) Sex mismatch 3) Phenotype missing	815	measured	[PMID: 19424496]Nelis M, Esko T, Magi R, Zimprich F, Zimprich A, et al.(2009) Genetic Structure of Europeans: A View fromtheNorth–East. PLoSONE 4(5): e5472. [PMID: 15133739] Metspalu,A. The EstonianGenome Project.DrugDevelopment Research 62, 97‐101 (2004).
	Ely Study	MRC Ely Study	Population-based	white European	1625	≥ 95%	1) Missing phenotype data 2) Gender check 3) Duplicates check 4) Relatedness check 5) Heterozygosity check 6) Ancestry check	1447	measured	[PMID: 17257284]
	EMIL SWABIA	Echinococcus Multilocularis and Internal Diseases in Leutkirch (EMIL) study	Population-based	white European	NA	≥ 95%	1) Missing phenotype 2) Non-European ancestry	1723	measured	[PMID: 16112969] Boehm, B.O. et al. Prevalence of the metabolic syndrome in southwest Germany. Scand J Clin Lab Invest Suppl 240:122-128 (2005). [PMID:16981990] Haenle, M.M. et al. Overweight, physical activity, tobacco and alcohol consumption in a cross-sectional random sample of German adults. BMC Public Health. 6:233 (2006).
	EPIC-Norfolk T2D	EPIC (European Prospective Investigation into Cancer) Norfolk T2D case-Cohort Study	Population-based	white European	963 , sub-cohort; 727, T2D cases	≥ 95%	1) Missing phenotype data 2) Gender check 3) relatedness check; 4) heterozygosity check; 5) ancestry check	792 - sub-cohort; 567 - T2D cases	measured	[PMID: 10466767] Day,N.E. et al. EPIC-Norfolk: study design and characteristics of the cohort. European Prospective Investigation of Cancer. British Journal of Cancer 80, 95-103 (1999). [PMID: 18454148] Loos,R.J. et al. Common variants near MC4R are associated with fat mass, weight and risk of obesity. Nat Genet 40, 768-775 (2008).
	EPOGH-FLEMENGHO	European Network for Genetic-Epidemiological Studies: building a method to dissect complex genetic traits, using essential hypertension as a disease model	Family-based	white European	985	≥ 98%	1) Missing phenotypes 2) Outliers PCA	861	measured	[PMID: 24019403] Salvi E, et al.. Target sequencing, cell experiments, and a population study establish endothelial nitric oxide synthase (eNOS) gene as hypertension susceptibility gene. Hypertension. 2013;62:844-52.
	Fenland	The Fenland Study	Population-based	white European	3217	≥ 95%	1) Missing phenotype data 2) Gender check 3) Duplicates check 4) Relatedness check 5) Heterozygosity check 6) Ancestry check	2982	measured	[PMID: 20519560] Rolfe Ede L, Loos RJ, Druet C, Stolk RP, Ekelund U, Griffin SJ, Forouhi NG, Wareham NJ, Ong KK. Association between birth weight and visceral fat in adults. Am J Clin Nutr 2010;92:347-52.
	FUSION stage 2a	FUSION stage 2	case-control	Finnish	2951	≥ 98.15%	1) Missing BMI, age, age<18. 2) Gender discrepancy or anomaly 3) Unexplained duplicate sample	2929	measured	[PMID: 17463248] Scott, L.J., Mohlke, K.L., Bonnycastle, L.L., Willer, C.J., Li, Y., Duren, W.L., Erdos, M.R., Stringham, H.M., Chines, P.S., Jackson, A.U., Prokunina-Olsson L., Ding, C.J., Swift, A.J., Narisu, N., Hu, T., Pruim, R., Xiao, R., Li, X.Y., Conneely, K.N., Riebow, N.L., Sprau, A.G., Tong, M., White, P.P., Hetrick, K.N., Barhnart, M.W., Bark, C.W., Goldstein, J.L., Watkins, L., Xiang,…
	GLACIER	Gene x Lifestyle Interactions and Complex Traits Involved in Elevated Disease Risk	Population-based	Caucasian (white-European)	5924	≥ 95%	1) Missing body weight and height 2) Missing age and sex	5924	Measured	[PMID: 20870969] Renström F et al. Genetic predisposition to long-term nondiabetic deteriorations in glucose homeostasis: Ten-year follow-up of the GLACIER study. Diabetes. 2011 Jan;60(1):345-54. [PMID: 14660243] Hallmans G. et al. Cardiovascular disease and diabetes in the Northern Sweden Health and Disease Study Cohort - evaluation of risk factors and their interactions. Scand J Public Health S…
	HEALTH2006	HEALTH2006	Population-based	white European	2374	≥ 95%	1) Missing body weight and height 2) Heterozygosity	2277	measured	[PMID: 23615486] Thuesen BH, Cerqueira C, Aadahl M, Ebstrup JF, Toft U, Thyssen JP, Fenger RV, Hersoug LG, Elberling J, Pedersen O, Hansen T, Johansen JD, Jørgensen T, Linneberg A.Cohort Profile: The Health2006 cohort, Research Centre for Prevention and Health.Int J Epidemiol. Apr 24 (2013). [PMID:23460889 ] Skaaby T, Husemoen LL, Martinussen T, Thyssen JP, Melgaard M, Thuesen BH, Pisinger C, Jør…
	HUNT 2b	The Nord-Trøndelag Health Study 2	Population-based, although T2D case-control samples selected for metabochip typing	Norwegian	1567	≥ 98.15%	1) Missing BMI, age, age<18, forms of diabetes other than T2D (cases) 2) Gender discrepancy or anomaly 3) Unexplained duplicate sample	1334	measured	Holmen J, Midthjell K, et al. The Nord-Trøndelag Health Study 1995-97 (HUNT 2):Objectives, contents, methods and participation. Nor J Epidemiol 2003;13(1):19-32.
	IMPROVE	Carotid Intima Media Thickness (IMT) and IMT-PRogression as Predictors of Vascular Events in a High-Risk European Population	population-based	European	3704	≥ 95%	1) Missing phenotypes 2) Ambiguous sex 3) Cryptic relatedness	3704	measured	(pubmedid 22999719) Baldassarre D, Hamsten A, Veglia F, de Faire U, Humphries SE, Smit AJ, Giral P, Kurl S, Rauramaa R, Mannarino E, Grossi E, Paoletti R, Tremoli E; IMPROVE Study Group.J Am Coll Cardiol. 2012
	INTER99	INTER99	Population-based	white European	5589	≥ 95%	1) Missing body weight and height 2) Heterozygosity	5587	measured	[PMID: 12882858] Glümer C, Jørgensen T, Borch-Johnsen K.Prevalences of diabetes and impaired glucose regulation in a Danish population: the Inter99 study.Diabetes Care. 8:2335-2340(2003). [PMID:23754956] Grarup N, Sulem P, Sandholt CH, Thorleifsson G, Ahluwalia TS, Steinthorsdottir V, Bjarnason H, Gudbjartsson DF, Magnusson OT, Sparsø T, Albrechtsen A, Kong A, Masson G, Tian G, Cao H, Nie C, Kris…
	KORA S3	Cooperative Health Research in the Region of Augsburg	Population-based	white European	3113	none	1) No german passport 2) In GWAS sample 3) Missing phenotype	1278	measured	[PMID: 16032514] Wichmann HE et al. KORA-gen--resource for population genetics, controls and a broad spectrum of disease phenotypes. Gesundheitswesen 67 Suppl 1, S26-30 (2005).
	KORA S4	Cooperative Health Research in the Region of Augsburg	Population-based	white European	3028	none	1) No german passport 2) In GWAS sample 3) Missing phenotype	1222	measured	[PMID: 16032514] Wichmann HE et al. KORA-gen--resource for population genetics, controls and a broad spectrum of disease phenotypes. Gesundheitswesen 67 Suppl 1, S26-30 (2005).
	METSIMa	Metabolic Syndrome In Men	Population-based, although T2D case-control samples selected for metabochip typing	Finnish	2176	≥ 98.15%	1) Missing BMI, age, age<18 2) Gender discrepancy or anomaly 3) Unexplained duplicate sample	2014	measured	[PMID: 19223598] Stancakova A, Javorsky M, Kuulasmaa T, Haffner SM, Kuusisto J, Laakso M: Changes in insulin sensitivity and insulin release in relation to glycemia and glucose tolerance in 6416 Finnish men. Diabetes 58:1212-1221, 2009.
	MRC NSHD	MRC National Survey of Health & Development	Birth cohort	white European	5362	≥ 95%	1) Missing body weight and height 2) Duplicates check 3) Gender check 4) Relatedness check 5) Heterozygosity check 6) Ancestry check	2429	measured	[PMID: 16204333] Wadsworth M, Kuh D, Richards M, Hardy R. Cohort Profile: The 1946 National Birth Cohort (MRC National Survey of Health and Development). Int J Epidemiol. 35(1):49-54. (.2006)
	SCARFSHEEP	Stockholm Coronary Atherosclerosis Risk Factor-Stockholm Heart Epidemiology Program	MI case-control	European (Swedish)	2418	≥ 95%	1) Missing phenotypes 2) Ambiguous sex 3) Cryptic relatedness	2418	measured
	STR	Swedish Twin Registry	Population-based	white European	2702	≥90%	1) Heterozygosity, (F-mean(F))/sd(Z) ≥ 5 2) Missing phenotypes used in analysis 3) One twin from each pair excluded	749	measured	[PMID: 17254424] Lichtenstein, P. et al. The Swedish Twin Registry in the third millennium: an update. Twin Res Hum Genet 9, 875-82 (2006).
	Tromsøb	Tromsø 4	Population-based, although T2D case-control samples selected for metabochip typing	Norwegian	1421	≥ 98.15%	1) Missing BMI, age, age<18. 2) Gender discrepancy or anomaly 3) Unexplained duplicate sample	1418	measured	[PMID: 21422063] Jacobsen BK, Eggen AE, Mathiesen EB, Wilsgaard T, Njolstad I. Cohort profile: The Tromso Study. Int J Epidemiol; April 21, 2011
	Whitehall II	The Whitehall II study	Cohort of London-based civil servants	European descent	3413	≥ 95%	1) Missing phenotype data 2) Gender check 3) Duplicates check 4) Relatedness check 5) Ethnic check	2010	measured	[PMID: 15576467] Marmot M, Brunner E. Cohort Profile: the Whitehall II study. Int J Epidemiol. 2005; 34:251-6.] [PMID: 21441441] Jensen AC et al. Associations of common genetic variants with age-related changes in fasting and postload glucose: evidence from 18 years of follow-up of the Whitehall II cohort. Diabetes. 2011; 60:1617-23.
	a These studies were analysed together (see study "D2D2007, DPS, DR'S EXTRA, FUSION stage 2, and METSIM" in Table S2) b These studies were analysed together (see study "HUNT 2 and Tromsø" in Table S2)
