# Supplementary material for: The Influence of Age and Sex on Genetic Associations with Adult Body Size and Shape: A Large-Scale Genome-Wide Interaction Study
Source: PLoS Genet. 2015 Oct 1;11(10):e1005378. doi: 10.1371/journal.pgen.1005378 (PMC4591371; doi:10.1371/journal.pgen.1005378)
Supplement: S3 Table — ** There were significant differences in the number of subjects available for different phenotypes. In this case, separate summary statistics were provided. (XLSX) [file pgen.1005378.s019.xlsx]

## Sheet: Table S3
	Study	Men																																Women
		<= 50yrs																>50yrs																<= 50yrs
			Age (yrs)		BMI (kg/m²)		Weight (kg)		Height (m)		WC (cm)		Hip (cm)		WHR (cm/cm)				Age (yrs)		BMI (kg/m²)		Weight (kg)		Height (m)		WC (cm)		Hip (cm)		WHR (cm/cm)				Age (yrs)		BMI (kg/m²)		Weight (kg)		Height (m)		WC (cm)		Hip (cm)		WHR (cm/cm)
		N	mean	SD	mean	SD	mean	SD	mean	SD	mean	SD	mean	SD	mean	SD		N	mean	SD	mean	SD	mean	SD	mean	SD	mean	SD	mean	SD	mean	SD		N	mean	SD	mean	SD	mean	SD	mean	SD	mean	SD	mean	SD	mean	SD
	GWAS Studies
	ADVANCE - GWAS CASES	114	40.42	3.98	31.39	5.77	99.03	21.16	1.77	0.074	101.75	13.61	NA	NA	NA	NA		NA	NA	NA	NA	NA	NA	NA	NA	NA	NA	NA	NA	NA	NA	NA		70	45.33	4.16	31.16	7.33	84.45	19.94	1.65	0.067	93.94	17.88	NA	NA	NA	NA
	ADVANCE - GWAS CONTROLS	128	40.46	3.23	27	4.48	86.45	16.38	1.79	0.071	92.95	12.17	NA	NA	NA	NA		NA	NA	NA	NA	NA	NA	NA	NA	NA	NA	NA	NA	NA	NA	NA		96	45.04	2.8	25.7	6.34	70.21	17.13	1.66	0.058	78.78	12.46	NA	NA	NA	NA
	AE	11	46.09	4.23	26.22	4.54	83.78	15,68	178.67	7.26	NA	NA	NA	NA	NA	NA		455	68.61	8.28	26.28	3.16	81.58	11.54	176.16	6.9	NA	NA	NA	NA	NA	NA		8	45.5	4.07	25.91	4.77	71	9.96	1.6603	5.79	NA	NA	NA	NA	NA	NA
	AGES-Reykjavik	759	45.4	3.3	25.5	3.2	81.7	11.6	179	6	NA	NA	NA	NA	NA	NA		592	55.1	3.4	25.8	3	80.8	11.2	176.8	6.1	NA	NA	NA	NA	NA	NA		788	45.9	3.6	24.4	3.6	66.8	10.2	1.654	5.3	NA	NA	NA	NA	NA	NA
	Amish	344	35.4	8.4	25.6	3.2	77.5	11	174	6.2	89	9.4	100.9	6.2	0.88	0.06		270	64.2	10.1	26.7	3.9	77.2	12.6	170	6.3	95.2	10.9	102.1	7.4	0.93	0.06		277	36.4	8.8	27.2	5.4	71.6	14.2	1.624	5.4	82.7	11.2	104.3	11.2	0.79	0.05
	arcOGEN	NA	NA	NA	NA	NA	NA	NA	NA	NA	NA	NA	NA	NA	NA	NA		1665	69.8907	7.84574	28.8428	4.4203	88.5804	20.672	1.74093	0.0681338	NA	NA	NA	NA	NA	NA		NA	NA	NA	NA	NA	NA	NA	NA	NA	NA	NA	NA	NA	NA	NA
	ARIC	1278	47.6734	1.69613	27.6649	4.33258	87.174	14.864	1.77413	0.0647932	99.6322	11.122	103.37	8.27919	0.962467	0.0521506		3128	57.5348	4.03653	27.335	3.83415	84.4814	13.0965	1.75724	0.0640232	99.5904	10.1202	102.446	7.24209	0.970967	0.0518688		1618	47.4923	1.6831	26.3275	5.62131	70.032	15.5721	0.016305	0.0576684	90.4314	14.8463	104.123	11.1121	0.865793	0.0794458
	B58C-T1DGC	1259	45.31	0.34	28.02	4.19	87.05	14.41	1.762	0.066	98.69	10.95	105.94	7.31	0.9302	0.0608		NA	NA	NA	NA	NA	NA	NA	NA	NA	NA	NA	NA	NA	NA	NA		1328	45.27	0.34	26.97	5.58	71.63	15.45	1.629	0.06	85.58	12.82	105.27	11.48	0.8113	0.0632
	B58C-WTCCC	741	44.89	0.34	27.84	4.29	86.56	14.63	1.762	0.069	98.85	10.91	106.04	7.48	0.9307	0.0574		NA	NA	NA	NA	NA	NA	NA	NA	NA	NA	NA	NA	NA	NA	NA		738	44.89	0.35	26.92	5.44	70.96	14.68	1.624	0.063	85.53	12.29	105.16	10.82	0.8117	0.0612
	BLSA	48	39.56	8.39	37.84	4.92	90.26	17.36	179.975	6.6099	93.7646	13.572	104.496	10.453	0.8945	0.06312		414	76.3357	10.6314	27.4655	4.429	83.2698	15.624	173.909	7.138	98.204	11.993	102.651	9.623	0.956	0.0705		62	39.66	8.0101	25.843	6.121	71.748	16.554	1.66805	6.34	81.661	13.115	102.834	12.206	0.7934	0.0772
	BPROOF	NA	NA	NA	NA	NA	NA	NA	NA	NA	NA	NA	NA	NA	NA	NA		1459	73.4	6.1	26.8	3.4	83.1	11.9	175.9	6.6	NA	NA	NA	NA	NA	NA		NA	NA	NA	NA	NA	NA	NA	NA	NA	NA	NA	NA	NA	NA	NA
	BSN	237	36.77	8.65	25.96	3.47	81.86	12.43	177.4	6.59	89.87	9.74	99.11	7.63	0.91	0.06		321	66.02	8.65	27.11	3.57	81.79	12.24	173.62	7.27	96.55	10.01	100.92	7.46	0.95	0.06		341	37.13	8.09	24.87	4.18	67.58	11.5	164.92	6.05	77.66	10.7	100.57	8.89	0.77	0.06
	CAHRES-cases	NA	NA	NA	NA	NA	NA	NA	NA	NA	NA	NA	NA	NA	NA	NA		NA	NA	NA	NA	NA	NA	NA	NA	NA	NA	NA	NA	NA	NA	NA		NA	NA	NA	NA	NA	NA	NA	NA	NA	NA	NA	NA	NA	NA	NA
	CAHRES-controls	NA	NA	NA	NA	NA	NA	NA	NA	NA	NA	NA	NA	NA	NA	NA		NA	NA	NA	NA	NA	NA	NA	NA	NA	NA	NA	NA	NA	NA	NA		NA	NA	NA	NA	NA	NA	NA	NA	NA	NA	NA	NA	NA	NA	NA
	CHS	NA	NA	NA	NA	NA	NA	NA	NA	NA	NA	NA	NA	NA	NA	NA		1281	73	5.66	26.45	3.53	79.7	11.93	173.28	6.47	97.71	9.73	101.14	7.59	0.97	0.07		NA	NA	NA	NA	NA	NA	NA	NA	NA	NA	NA	NA	NA	NA	NA
	COLAUS	1141	42.7968	4.2373	25.9048	3.8458	80.4804	12.959	1.7624	0.073	92.6543	10.3849	101.691	7.6129	0.9099	0.0576		1419	61.0925	6.7524	27.2065	4.0555	82.3772	13.4746	1.7396	0.0719	98.5638	11.2067	104.025	8.0518	0.9461	0.06		1134	42.8459	4.2457	24.1802	4.5115	64.8669	12.2912	1.6389	0.068	79.8549	11.1655	98.7187	9.6533	0.8077	0.0626
	COROGENE cases	165	44.2848	4.83988	28.316	5.33849	89.8212	17.845	178.006	6.58759	NA	NA	NA	NA	NA	NA		1094	66.9552	9.25806	27.4073	4.2851	84.5112	14.8742	175.449	6.35979	NA	NA	NA	NA	NA	NA		28	45.0714	4.26813	27.301	7.3697	71.8929	18.9997	1.62286	5.40135	NA	NA	NA	NA	NA	NA
	COROGENE controls	379	41.0026	6.31053	26.4123	3.83433	84.4844	13.4984	178.796	7.0331	93.6585	11.3774	99.8773	7.03151	0.936139	0.0724175		626	62.2428	6.59006	27.7062	3.91283	84.908	12.8829	175.031	6.54394	99.151	11.1971	100.709	7.18651	0.982987	0.065343		235	40.5532	7.09583	24.8147	4.37849	67.8409	12.2546	1.65367	6.2452	80.9464	11.2629	98.256	9.36154	0.822761	0.0693112
	CROATIA-Korcula	92	39.47	8.05128	28.56	3.72208	92.33	11.734	180	6.48652	97.18	9.0588	104.9	6.12382	0.9293	0.0559807		224	64.42	8.62739	28.85	3.55173	88.85	12.8572	175.4	6.24414	101.35	10.3941	104.5	6.8534	0.9689	0.0699017		194	40.59	7.60175	25.2	3.90414	69.35	11.0193	1.66	6.25424	83.94	10.2587	100.4	8.21653	0.8355	0.0714
	CROATIA-Split	110	35.28	8.91358	27.51	4.07825	91.47	14.1974	182.3	5.80431	94.15	11.1773	104.01	6.7389	0.9033	0.0649115		103	61.42	7.66265	28.73	3.52299	92.53	14.2373	179.2	6.11041	100.41	10.0855	104.8	6.65417	0.9563	0.047372		132	37.5	9.16224	24.29	3.55176	68.96	10.4924	1.685	6.24543	81.7	9.06485	98.94	6.79067	0.8246	0.0539102
	CROATIA-Vis	126	38.4206	8.63051	26.3427	3.83668	85.1651	14.2075	179.6	6.70766	94.5889	10.7068	100.991	6.44154	0.934507	0.0605686		258	64.4729	8.5443	28.0452	3.49687	85.0419	12.6372	173.4	6.89758	99.9112	9.00792	101.295	6.41165	0.986182	0.0588079		198	39.6667	8.52765	25.2851	5.03178	69.0076	13.9745	1.65273	6.15752	86.7338	12.342	101.521	9.37473	0.853389	0.0723584
	DECODE	1888	40.31	8.36	28.4	5.54	92.94	19.36	180.78	6.94	101.14	15.59	107.61	10.55	0.938	0.086		7325	70.54	10.75	27.69	4.56	87.12	15.93	177.25	6.64	102.72	13.57	106.06	9.27	0.968	0.089		6550	38.32	8.48	26.42	6.07	74.11	17.54	1.6745	5.81	96.92	17.52	109.79	13.8	0.88	0.089
	DESIR	72	47.1	1.72	23.2	1.12	71.26	5.99	1.751	0.057	84.7	5.89	95.86	3.94	0.8837	0.04		106	56.39	3.84	23.09	1.19779	68.2129	6.52107	1.7171	0.0654396	84.41	4.977	94.54	4.01948	0.892989	0.0397		293	42.6	5.859	20.8228	1.82098	54.0134	5.87294	1.60987	0.0571074	69.2736	5.62586	92.1246	5.61322	0.752562	0.0488084
	Diabetes Genetics Initiative	206	45.3353	3.39753	27.2453	3.87357	86.1767	13.5371	177.772	6.32061	96.7377	11.123	100.784	8.0295	0.970664	0.0657827		1021	64.2486	7.91839	27.5339	3.57267	84.0821	12.3372	174.659	6.13131	98.8174	10.1849	101.946	7.36561	0.975902	0.0699615		158	44.903	3.70206	28.117	4.37448	76.1285	13.4557	1.64386	5.57574	88.2027	11.7058	103.75	10.0836	0.858494	0.0719331
	DNBC	NA	NA	NA	NA	NA	NA	NA	NA	NA	NA	NA	NA	NA	NA	NA		NA	NA	NA	NA	NA	NA	NA	NA	NA	NA	NA	NA	NA	NA	NA		1802	29.31	4.2	23.52	4.31	67.12	12.93	1.689	0.0611	NA	NA	NA	NA	NA	NA
	EGCUT_370K	837	31	9.34	24.7	4.22	80	13.66	181	6.64	88	11.78	101	7.85	0.87	0.08		275	61	8.93	27.4	4.52	83	16.56	174	6.932	98	12.74	102	8.84	0.95	0.07		855	32	9.5	23.1	5.2	65	15.1	1.67	6	75	12.2	100	10.7	0.8	0.1
	EGCUT_OMNI	988	35	9.6	25.2	4.6	82	16	180	7	90	0.1	102	9.3	0.9	0.1		1503	68	10.1	26.9	4.7	82	16.1	175	6.8	98	13.8	102	11.1	1	0.1		823	34	9.2	23.8	5.2	66	14.9	1.66	6.4	78	12.8	100	11.4	0.8	0.1
	EPIC-Obesity Study	1131	59.8223	9.01863	26.6203	3.20737	80.427	11.0887	173.749	6.58677	95.8297	9.45884	102.867	6.21687	0.930578	0.0581362		1131	59.8223	9.01863	26.6203	3.20737	80.427	11.0887	173.749	6.58677	95.8297	9.45884	102.867	6.21687	0.930578	0.0581362		1131	58.7407	9.00172	26.195	4.38969	67.9801	11.6156	1.61146	5.83824	81.9199	10.7621	103.535	9.09847	0.789937	0.0609868
	ERF	600	37.6062	8.60238	26.7561	4.08955	84.4241	14.0092	177.593	6.58876	90.7538	10.9516	99.6799	7.20471	0.908836	0.0684919		618	62.0763	8.40723	27.6889	4.14017	81.9109	13.7372	171.867	6.64334	0.980954	0.0707599	99.2064	7.33085	0.980954	0.0707599		794	37.2078	8.58332	25.5303	5.17093	68.8183	14.6503	1.64126	6.32506	78.4475	12.1193	101.183	10.3658	0.77372	0.0673581
	FamHS	765	37.9554	6.35739	27.52	4.93149	88.1125	17.4917	1.78795	0.0701091	97.5138	13.375	104.421	9.46966	0.931542	0.0658671		1020	62.535	7.02172	28.3556	4.37044	87.4108	14.9058	1.75491	0.0673011	103.165	11.8931	104.725	8.76235	0.984208	0.0646135		792	38.4603	6.26879	26.5802	6.52357	71.8262	18.183	1.64362	0.0612027	89.654	17.549	106.081	13.2922	0.840628	0.0832706
	Fenland	449	41.0731	5.50674	27.4441	3.797	86.6301	13.493	1.77562	0.0648221	97.8186	11.0634	104.688	7.30737	0.933384	0.0720686		166	53.5975	2.04055	27.881	4.19602	87.097	14.8964	1.76596	0.0656358	101.053	12.6961	105.175	7.63148	0.95877	0.0739531		547	41.6982	5.38188	26.5367	5.61518	71.4737	15.8117	1.64069	0.0637235	86.1821	12.9437	103.237	11.4958	0.832404	0.0601828
	FinGesture	125	44.688	4.47469	27.8228	4.08304	86.9008	15.049	1.76688	0.0653454	NA	NA	NA	NA	NA	NA		631	64.9303	8.57024	27.0845	3.90689	81.2969	13.7932	1.73016	0.0660157	NA	NA	NA	NA	NA	NA		16	44.6875	5.31311	27.6056	5.68865	75.5625	14.1196	1.6575	0.0777603	NA	NA	NA	NA	NA	NA
	FRAMHS	3431	36.6319	7.80745	26.9085	4.10504	83.9746	14.3371	1.76574	0.0690286	96.9605	10.5499	101.874	7.57706	0.950618	0.0585418		359	54.1448	3.45217	28.1287	4.78283	86.8726	15.4821	1.75761	0.0664266	98.6318	10.1781	102.102	7.3194	0.964873	0.0537152		4111	36.3766	7.76205	24.6257	5.13528	65.2892	14.394	1.6279	0.0630673	80.0967	13.2788	100.436	11.7016	0.794903	0.0629218
	FUSION controls	30	47.6667	1.44636	26.1093	2.54299	81.48	10.143	1.76533	0.0635574	92.9333	7.90322	96.9333	6.31191	0.958333	0.0465413		542	64.279	6.8292	27.0754	3.57287	81.3993	12.0773	1.73348	0.0635312	96.8649	9.94759	100.347	7.14949	0.964491	0.0581509		28	47.4218	1.86993	25.508	3.89439	69.3	13.0379	1.64529	0.058423	83.4464	10.1838	98.9643	8.82434	0.841759	0.0547647
	FUSION T2D cases	42	47.5592	2.14676	30.1217	4.29454	92.7167	15.6517	1.75276	0.0654709	103.726	9.94632	104.148	7.2174	0.995309	0.0602523		581	63.1065	6.40442	29.391	4.00201	88.1219	13.3787	1.73081	0.0654709	103.726	9.94632	104.148	7.2174	0.995309	0.0602523		26	48.103	1.46155	32.4436	7.17466	86.2462	20.0529	1.63076	0.0671362	99.24	16.5058	112.68	14.7294	0.878806	0.0780304
	GASP-1-cases	NA	NA	NA	NA	NA	NA	NA	NA	NA	NA	NA	NA	NA	NA	NA		483	68.1843	7.34337	26.4269	3.48122	82.5165	12.272	176.631	6.65482	NA	NA	NA	NA	NA	NA		NA	NA	NA	NA	NA	NA	NA	NA	NA	NA	NA	NA	NA	NA	NA
	GASP-1-controls	NA	NA	NA	NA	NA	NA	NA	NA	NA	NA	NA	NA	NA	NA	NA		477	66.591	7.23144	26.5114	3.58881	82.8163	13.1439	176.652	6.59171	NA	NA	NA	NA	NA	NA		NA	NA	NA	NA	NA	NA	NA	NA	NA	NA	NA	NA	NA	NA	NA
	GASP-2-cases	NA	NA	NA	NA	NA	NA	NA	NA	NA	NA	NA	NA	NA	NA	NA		1414	66.2385	6.95135	26.3331	3.3712	82.5322	12.2691	176.905	6.2727	NA	NA	NA	NA	NA	NA		NA	NA	NA	NA	NA	NA	NA	NA	NA	NA	NA	NA	NA	NA	NA
	GASP-2-controls	NA	NA	NA	NA	NA	NA	NA	NA	NA	NA	NA	NA	NA	NA	NA		499	67.2782	7.31372	26.0171	3.3205	80.7674	11.3688	176.127	6.12264	NA	NA	NA	NA	NA	NA		NA	NA	NA	NA	NA	NA	NA	NA	NA	NA	NA	NA	NA	NA	NA
	GENDIAN_BMI	21	44.1657	5.22027	33.2509	7.71878	106.667	25.6639	1.79048	0.0854094	113.222	17.7948	110.588	14.1512	1.03746	0.0683161		216	65.487	8.23763	30.7413	5.25602	93.375	18.0344	1.74101	0.0712448	111.734	13.979	108.635	13.1671	1.03392	0.114512		12	42.6283	5.9111	34.1994	9.57843	94	29.9302	1.65167	0.053739	115	19.2549	118.889	17.2731	0.969028	0.104692
	GENDIAN_WHRadjBMI	17	44.1906	4.92215	33.4362	6.11409	107.412	21.0596	1.79118	0.0899223	114.765	17.057	110.588	14.1512	1.03746	0.0683161		144	63.7883	7.37148	31.4888	5.06851	95.7083	16.9206	1.74229	0.0688235	111.819	14.1212	108.646	13.2123	1.03392	0.114512		9	41.1478	6.0792	35.9125	9.35564	98.6667	30.0791	1.65111	0.0617342	115	19.2549	118.889	17.2731	0.969028	0.104692
	GEOS CASE	275	42.56	5.9	29.07	6.3	NA	NA	178.59	7.44	NA	NA	NA	NA	NA	NA		NA	NA	NA	NA	NA	NA	NA	NA	NA	NA	NA	NA	NA	NA	NA		173	38.5	7.8	27.8	7	NA	NA	1.65	7.5	NA	NA	NA	NA	NA	NA
	GEOS Control	282	40.6	6.2	28.1	4.9	NA	NA	180.6	6.8	NA	NA	NA	NA	NA	NA		NA	NA	NA	NA	NA	NA	NA	NA	NA	NA	NA	NA	NA	NA	NA		216	38.07	7	25.9	6	NA	NA	1.6498	6.4	NA	NA	NA	NA	NA	NA
	GerMIFS I	219	42.95	5.45	27,57	3,64	84,86	12,15	1,75	5,78	NA	NA	NA	NA	NA	NA		180	55.2	2.46	27.17	3.09	82.98	11.36	1.75	6.64	NA	NA	NA	NA	NA	NA		76	43.29	5.68	27.56	4.71	73.39	13.25	1.63	5.34	NA	NA	NA	NA	NA	NA
	GerMIFS II	115	42.6	5.19	27.5	3.28	84.97	11.75	1.76	6.22	NA	NA	NA	NA	NA	NA		170	57.32	3.87	27.22	3.21	82.43	11.11	1.74	5.89	NA	NA	NA	NA	NA	NA		31	42.74	5.8	29.4	5.33	76.48	15.6	1.61	6.07	NA	NA	NA	NA	NA	NA
	GOOD	937	18.9	0.6	22.4	3.2	73.9	11.6	181.7	6.6	78.5	7.2	92.6	7.9	0.8	0.04		NA	NA	NA	NA	NA	NA	NA	NA	NA	NA	NA	NA	NA	NA	NA		NA	NA	NA	NA	NA	NA	NA	NA	NA	NA	NA	NA	NA	NA	NA
	GOYA male - Controls	592	42.5	4.3	25.8	3.6	82.1	12.8	178.18	6.8	91.9	11	99.7	8.78	0.9	0.41		329	57.4	5.6	26.6	3.4	82.1	12.7	175.6	7.6	95.3	12.9	100.5	10.2	0.88	0.7		NA	NA	NA	NA	NA	NA	NA	NA	NA	NA	NA	NA	NA	NA	NA
	GOYA male - Cases	704	41.4	4.1	35.9	5.7	114.5	19.5	178.5	6.4	117.5	14.8	115	12	1	0.38		89	55.5	5.4	175.9	4.8	105.5	1.8	175.9	6.1	114.1	12.7	112.6	10	1	0.07		NA	NA	NA	NA	NA	NA	NA	NA	NA	NA	NA	NA	NA	NA	NA
	H2000 cases	228	41.5219	5.83733	29.559	3.49691	92.9781	12.0189	177.351	6.69517	104.263	8.17518	103.844	6.4837	1.00384	0.0411159		182	58.6154	6.72797	29.3142	3.7811	88.8736	12.8708	174.089	7.41729	105.352	9.55473	104.574	7.78412	1.00719	0.0452877		196	42.1327	5.51481	30.1619	5.16968	79.352	14.2041	1.62247	7.38743	97.5459	12.029	109.538	10.6613	0.889644	0.0529657
	H2000 controls	219	41.4064	5.91873	25.3461	2.74934	79.0046	9.55165	176.564	7.01857	91.7443	7.89094	96.9201	5.28472	0.946008	0.0531415		182	57.9231	5.96441	25.5142	3.4559	76.7363	11.1799	173.421	6.47796	94.0027	9.85061	97.5824	6.63731	0.961962	0.0552106		202	41.9752	5.60866	23.8564	3.40078	63.4307	8.86985	1.63199	6.73335	80.8366	9.07325	97.146	7.49907	0.831186	0.05293
	HBCS	NA	NA	NA	NA	NA	NA	NA	NA	NA	NA	NA	NA	NA	NA	NA		704	61.3648	2.73484	27.5047	4.27649	86.0885	14.4868	1.76834	0.0576638	99.0881	16.8132	103.038	8.97479	0.955966	0.0680823		NA	NA	NA	NA	NA	NA	NA	NA	NA	NA	NA	NA	NA	NA	NA
	HELIC-HA	141	34.36	9.04063	29.16	4.58052	89.26	15.3491	1.751	0.0629984	98.08	12.7596	106.5	7.89662	0.9194	0.0867945		250	72.15	10.2377	29.48	4.58707	82.74	11.3039	1.675	0.0681007	105.8	11.3039	106.6	9.0667	0.993	0.0631391		126	34.55	9.13453	26.38	5.59864	69.77	14.4401	1.628	0.0539177	84.11	12.7976	105.8	11.4253	0.7943	0.0841706
	HELIC-HP	122	38.08	8.68918	26.41	4.10844	81.4	14.195	1.751	0.0776442	93.25	12.3985	102.14	8.28747	0.9127	0.0871477		95	60.55	7.69466	27.95	3.94417	80.56	13.0737	1.697	0.0653778	99.94	11.2412	103.4	7.06441	0.9639	0.0727454		360	35.53	8.78514	27.63	5.7976	70.28	14.8545	1.597	0.0681559	85.55	14.5994	106	11.819	0.8041	0.0781266
	HERITAGE Family Study	177	29.1	10	26.2	5	83.6	16.5	178.5	6.1	92.4	14.2	102.8	9	0.89	0.07		68	56.1	4.3	28	4.3	87	15.5	176.1	6.6	101.1	11.4	104.1	8.5	0.97	0.05		201	29.6	10.4	24.2	4.7	65.3	13.4	1.64	6.4	83.3	13.1	100.9	10.4	0.824	0.07
	HYPERGENES-controls	72	46.902	4.38	26.06	3.213	76.193	11.379	1.709	0.068	95.864	12.138	103.311	6.926	0.925	0.066		1000	63.374	10.164	25.941	3.273	76.098	10.542	1.713	0.069	95.234	9.782	102.339	6.115	0.929	0.057		23	48.196	1.957	25.493	3.983	67.172	11.593	1.622	0.048	82.506	9.908	104.524	9.361	0.788	0.044
	HYPERGENES-cases	629	42.019	7.074	27.419	3.648	82.994	12.55	1.739	0.07	96.892	12.464	104.816	8.964	0.923	0.067		560	57.719	6.612	27.425	3.378	79.46	11.194	1.702	0.07	99.344	10.418	103.434	8.05	0.96	0.057		355	42.562	6.37	26.757	5.411	68.924	15.104	1.604	0.07	89.009	14.702	107.819	12.273	0.823	0.068
	InCHIANTI	72	35.82	7.734	26.64	3.78	80.622	12.772	173.875	7.015	90.139	9.39	97.903	7.299	0.92	0.0523		423	72.038	7.97	27.14	3.32	74.92	11.76	165.93	7.53	95.34	9.12	99.47	7.3	0.958	0.0546		80	35.863	8.36	24.3	4.23	63.27	11.12	1.6145	6.47	78.18	11.038	96.563	9.65	0.809	0.0654
	Johnston County Osteoarthritis Project	33	48.3	1.61	32.39	6.73	100.92	24.03	1.76	0.08	107.36	13.2	111.72	11.78	0.96	0.06		544	65.01	9.17	29.64	4.74	89.7	16.73	1.74	0.07	102.61	11.78	108.25	10.17	0.94	0.06		73	48	1.74	30.39	7.58	80.73	20.96	1.63	0.05	93.18	18.14	109.79	14.53	0.84	0.08
	KORA S3	283	42.0707	7.32735	26.8615	3.6798	83.2608	12.1179	176.078	6.54276	93.8777	10.2943	103.026	6.68808	0.90977	0.0602789		530	58.7717	5.5218	28.1389	3.23127	83.7489	11.0939	172.44	6.14323	98.7717	8.94489	104.353	6.28126	0.945726	0.050622		325	42.0556	7.18379	25.6207	4.73011	67.9693	12.7142	1.62937	6.17268	79.8344	10.8181	101.877	9.53562	0.781863	0.0572166
	KORA S4	330	44.6454	3.89197	27.5574	4.21438	85.9736	14.6882	176.542	6.36466	97.0194	10.8858	104.943	8.31579	0.923515	0.0556564		554	59.9277	5.54708	28.2544	3.68812	84.6215	11.7473	173.067	6.31441	100.191	9.61808	104.879	6.60291	0.954123	0.0514183		379	44.7831	3.74102	26.2239	5.22095	69.4717	14.0808	1.62785	6.15996	82.8844	12.3556	103.866	11.0919	0.796323	0.0608993
	LifeLines	2096	40.9504	6.5301	26.2997	3.72641	88.4989	13.686	183.379	6.49806	94.7475	10.7799	100.162	7.74857	0.945145	0.0664704		1384	58.8248	7.99412	27.0728	3.46756	87.8992	12.557	180.129	6.52908	98.7822	10.1005	100.249	6.95866	0.984584	0.0613599		2908	41.0133	6.46936	25.4402	4.75452	73.7278	14.1473	1.70253	6.18801	85.932	12.1941	100.335	10.5019	0.855679	0.0707798
	LOLIPOP_EW_A	169	42.4789	5.37159	28.0125	5.00488	87.9899	16.9365	177.159	7.06286	98.0738	13.2883	104.383	8.35957	0.932321	0.0767294		344	60.2908	5.67011	28.4136	4.41613	85.3491	14.748	173.173	6.72633	100.416	11.4481	103.862	8.77208	0.961633	0.0633168		NA	NA	NA	NA	NA	NA	NA	NA	NA	NA	NA	NA	NA	NA	NA
	LOLIPOP_EW_P	164	42.0784	4.50333	28.3959	5.956	88.3213	18.9581	176.384	7.63387	98.4006	14.6589	104.771	9.00314	0.931342	0.0761459		487	60.2816	4.4243	28.7276	5.06956	87.0858	16.765	173.923	6.40241	101.704	13.0899	104.914	9.05174	0.963066	0.0709862		NA	NA	NA	NA	NA	NA	NA	NA	NA	NA	NA	NA	NA	NA	NA
	LOLIPOP_EW610	205	44.0335	3.82012	27.5472	4.23803	86.8327	15.1553	177.375	6.52739	96.7258	11.0846	103.539	7.98645	0.928195	0.0560301		473	61.281	6.51638	27.9081	4.53112	85.0901	14.9402	174.572	6.88671	99.1538	11.7605	103.859	8.20195	0.948475	0.0611722		73	43.3695	4.12165	26.4343	5.79707	71.6123	15.4873	1.64676	6.38354	86.3069	13.9774	102.438	10.7132	0.835417	0.0827168
	LURIC - Cases	192	44.7	4.4	27.78	4	86.28	14.38	176.07	6.7	99.1	11.35	101.87	8.82	0.97	0.064		1615	65.23	7.7	27.54	3.65	82.5	12.18	173.02	6.55	101.4	10.53	102.69	8.56	0.98	0.064		40	44.5	4.7	25.9	6.1	68.5	17.4	1.6255	6.64	88.8	14.9	99.5	12.1	0.89	0.08
	LURIC - Controls	119	41.3	7.3	26.6	3.8	84.8	13	178.43	7.3	96.7	10.9	100.6	8.4	0.96	0.08		218	62.3	7.5	27.9	3.8	86	13.3	175.5	6.63	101.3	10.97	103.6	9.05	0.97	0.06		44	43.86	5.05	26.24	4.38	70.75	12.15	1.6422	7.23	85.61	13.01	100.16	11.43	0.85	0.07
	MAP	NA	NA	NA	NA	NA	NA	NA	NA	NA	NA	NA	NA	NA	NA	NA		240	81.4	5.9	26.7	3.7	81.2	12.2	1.74	0.07	NA	NA	NA	NA	NA	NA		NA	NA	NA	NA	NA	NA	NA	NA	NA	NA	NA	NA	NA	NA	NA
	MGS Controls	579	38.2953	8.18118	30.6163	7.04185	98.9513	24.6877	1.79589	0.074447	NA	NA	NA	NA	NA	NA		668	65.1257	9.27697	31.0463	5.88677	98.6041	20.7883	1.77997	0.067947	NA	NA	NA	NA	NA	NA		746	36.1287	8.58496	31.9757	9.08186	87.2661	26.026	1.65088	0.070874	NA	NA	NA	NA	NA	NA
	MICROS_BMI	336	35.88	8.202	25.39	3.791	78.24	13.365	175.4	6.854	NA	NA	NA	NA	NA	NA		175	64.28	8.62442	27.03	4.04588	77.57	12.9531	169.3	6.74147	NA	NA	NA	NA	NA	NA		422	35.16	8.56298	23.9	4.43195	63.6	12.0173	1.631	5.99888	NA	NA	NA	NA	NA	NA
	MICROS_WHR	103	36.53	8.12502	25.4	3.67737	78.6	12.2724	175.9	6.74362	90.22	11.4086	96.27	9.25795	0.9392	0.105019		49	64.47	8.80602	26.12	3.85487	75.07	11.9442	169.5	6.45807	96.58	10.211	100.4	8.4728	0.9619	0.0611674		130	36	8.42937	23.57	4.69417	63.48	12.68	1.642	6.02048	80.97	11.9259	95.91	14.63	0.8492	0.0960383
	MIGen	1506	44.1489	4.82989	27.8997	4.60644	86.5009	16.3034	176.074	11.7519	NA	NA	NA	NA	NA	NA		113	62.1125	9.28986	28.1766	4.68768	87.4658	16.3346	176.064	7.25982	NA	NA	NA	NA	NA	NA		476	42.9772	5.50273	27.2368	7.03945	73.3024	20.4262	1.63872	7.12811	NA	NA	NA	NA	NA	NA
	Mount Sinai BioMe (Cases)	NA	NA	NA	NA	NA	NA	NA	NA	NA	NA	NA	NA	NA	NA	NA		227	64.6	9.1	27.98	5	NA	NA	1.8	0.1	NA	NA	NA	NA	NA	NA		NA	NA	NA	NA	NA	NA	NA	NA	NA	NA	NA	NA	NA	NA	NA
	Mount Sinai BioMe (Controls)	9	45	4.53	29.9	9.3	NA	NA	1.8	0.07	NA	NA	NA	NA	NA	NA		126	69.1	9.5	28.1	5.4	NA	NA	1.75	0.07	NA	NA	NA	NA	NA	NA		59	36.3	7.8	24.6	6.3	NA	NA	1.6	0.06	NA	NA	NA	NA	NA	NA
	NBS	11	48.1	2	25.3	3.2	84.1	13.3	182.2	6.2	NA	NA	NA	NA	NA	NA		895	66.5	6.8	26.1	3.5	81.5	11.9	176.7	6.5	NA	NA	NA	NA	NA	NA		297	44.3	5.2	24.4	4	68.8	11.2	1.681	6	NA	NA	NA	NA	NA	NA
	NELSON	NA	NA	NA	NA	NA	NA	NA	NA	NA	NA	NA	NA	NA	NA	NA		2,668 (height), 1,135 (weight, BMI)	59.9348	5.50735	27.0656	3.64384	86.1	13.1126	178.818	6.25371	NA	NA	NA	NA	NA	NA		NA	NA	NA	NA	NA	NA	NA	NA	NA	NA	NA	NA	NA	NA	NA
	NFBC66	2251	31	0	25.17	3.61	80.16	12.72	178	6	88.79	9.84	97.43	6.65	0.91	0.06		NA	NA	NA	NA	NA	NA	NA	NA	NA	NA	NA	NA	NA	NA	NA		2250	31	0	24.16	4.68	65.51	13.24	1.65	6	78.78	11.93	97.11	8.87	0.81	0.08
	NHS	NA	NA	NA	NA	NA	NA	NA	NA	NA	NA	NA	NA	NA	NA	NA		NA	NA	NA	NA	NA	NA	NA	NA	NA	NA	NA	NA	NA	NA	NA		644	46.14	2.81	24.74	4.54	66.7767	12.8697	1.6416	6.0198	76.06	10.5	99.47	9.91	0.77	0.13
	NSPHS	173	32	12.0039	26.5177	3.80856	80.1319	13.0808	173.722	6.52424	NA	NA	96.7778	13.452	NA	NA		136	67.3456	10.1013	27.9365	4.87249	79.3185	15.5096	168.39	7.72219	NA	NA	104.807	13.3039	NA	NA		205	31.8781	11.5164	24.6995	4.19793	64.2023	12.3693	1.61222	5.67015	NA	NA	89.7895	10.6053	NA	NA
	NTR-NESDA_cases	322	37.1	8.6	25.9	4.7	86.9	16.3	1.8307	6.87	94.4	13.5	104.7	8.9	0.9	0.074		206	56.4	4.1	27.2	3.9	87.4	13.3	1.7928	7.16	100.4	10.7	104.8	7.0	0.95	0.068		854	35.3	9.3	24.8	5.2	71.4	15.1	1.6986	6.45	83.5	12.7	102.6	11.3	0.81	0.072
	NTR-NESDA_controls	342	34.3	7.3	24.9	3.4	84.1	13.0	1.8367	6.76	89.4	10.6	104.0	6.5	0.86	0.067		343	60.0	5.8	26.6	3.3	85.9	12.0	1.795	6.89	97.7	10.5	105.2	6.5	0.93	0.070		679	34.2	7.5	24.2	3.9	70.0	12.3	1.7007	6.32	80.0	10.1	102.7	8.8	0.78	0.078
	ORCADES	150	38.94	7.89965	26.49	3.7568	83.73	12.633	1.778	6.48932	93.18	11.0978	100.1	6.17041	0.929	0.0728108		244	64.81	9.14719	29.04	4.15014	87.04	13.1837	1.731	5.88273	102.45	11.4799	103.78	9.04133	0.9866	0.0662672		199	37.64	8.36299	25.84	5.23925	68.64	13.0571	1.632	5.8886	84.79	12.9189	101.1	9.5059	0.8363	0.0691329
	PIVUS	NA	NA	NA	NA	NA	NA	NA	NA	NA	NA	NA	NA	NA	NA	NA		474	70.13	0.166164	26.9903	3.70571	83.4852	12.9666	1.75795	6.45058	94.7365	10.4488	100.17	6.70531	0.944378	0.0641551		NA	NA	NA	NA	NA	NA	NA	NA	NA	NA	NA	NA	NA	NA	NA
	PLCO	NA	NA	NA	NA	NA	NA	NA	NA	NA	NA	NA	NA	NA	NA	NA		2244	64.2	5.085	27.495	3.83	87.38	13.58	1.784	0.0657	NA	NA	NA	NA	NA	NA		NA	NA	NA	NA	NA	NA	NA	NA	NA	NA	NA	NA	NA	NA	NA
	PLCO2 cases	NA	NA	NA	NA	NA	NA	NA	NA	NA	NA	NA	NA	NA	NA	NA		2042	64.2	5.1	27.5	4.2	87.6	14.8	1.79	0.07	NA	NA	NA	NA	NA	NA		NA	NA	NA	NA	NA	NA	NA	NA	NA	NA	NA	NA	NA	NA	NA
	PLCO2 controls	NA	NA	NA	NA	NA	NA	NA	NA	NA	NA	NA	NA	NA	NA	NA		649	63.6	5.2	27	3.9	86.6	14	1.78	0.07	NA	NA	NA	NA	NA	NA		NA	NA	NA	NA	NA	NA	NA	NA	NA	NA	NA	NA	NA	NA	NA
	PREVEND	959	40.387	6.453	25.76	3.759	85.015	13.232	1.8167	7.064	91.069	11.123	99.309	6.82	0.916	0.074		911	62.007	7.129	27.103	3.472	85.219	11.773	1.77306	6.107	98.115	10.026	100.952	6.466	0.971	0.064		1046	39.911	6.299	24.796	4.615	70.887	13.197	1.69154	6.296	79.858	12.04	99.216	10.488	0.804	0.073
	PROCARDIS	614	45.34	4.75	27.57	4.33	85.16	14.76	1.757	7.08	99.67	11.8	101.8	7.5	0.97	0.07		4719	62.39	6.13	28.06	4	84.5	13.2	1.734	6.9	99.8	9.8	101.8	6.5	0.98	0.1		151	45.8	4.1	28.2	6.7	73.9	17.5	1.622	7.2	88.9	12.7	102.9	10.5	0.86	0.1
	PROSPER/PHASE	NA	NA	NA	NA	NA	NA	NA	NA	NA	NA	NA	NA	NA	NA	NA		2524	75	3.3	26.6	3.6	78.7	11.9	1.721	6.7	NA	NA	NA	NA	NA	NA		NA	NA	NA	NA	NA	NA	NA	NA	NA	NA	NA	NA	NA	NA	NA
	QFS	225	31.2	9.7	27.3	7.2	82.8	21.3	1.744	6	91.8	17.97	100.7	12.1	0.91	0.08		145	59.4	7.8	27.8	5.2	80.8	17.2	1.7009	6.64	97.9	13.6	101.1	10.2	0.97	0.06		317	32.9	10.1	27.6	8.6	72.2	22.7	1.6175	6.12	83.4	18.9	105.5	17.5	0.78	0.08
	QIMR	932	34.2439	8.93529	25.3988	3.701	80.9373	13.1523	1.78437	6.81136	NA	NA	NA	NA	NA	NA		538	62.829	8.55764	27.0775	4.0787	84.2872	12.9528	1.76486	6.64374	NA	NA	NA	NA	NA	NA		1457	35.082	8.32473	24.2359	4.80234	65.1144	13.2816	1.6396	6.95814	NA	NA	NA	NA	NA	NA
	RISC	524	39.8149	5.83538	26.4962	3.60898	84.7841	12.9815	1.7877	7.02291	93.3041	10.5851	101.51	8.92415	0.920568	0.0873261		158	55.4747	2.75935	26.7942	3.29748	83.572	11.3549	1.76536	6.7826	95.9484	9.56848	100.736	9.23684	0.958782	0.128743		612	40.7696	5.84392	24.6205	4.41703	67.1815	12.5765	1.65192	6.43175	80.2629	11.8031	99.0634	9.92118	0.810787	0.0960358
	ROS	NA	NA	NA	NA	NA	NA	NA	NA	NA	NA	NA	NA	NA	NA	NA		272	74.5	7.2	27.6	4.4	84.8	14.3	1.75	0.08	NA	NA	NA	NA	NA	NA		NA	NA	NA	NA	NA	NA	NA	NA	NA	NA	NA	NA	NA	NA	NA
	RS-I	NA	NA	NA	NA	NA	NA	NA	NA	NA	NA	NA	NA	NA	NA	NA		2246	67.87	7.97	25.69	2.987	78.71	10.74	1.749	6.7752	94.31	9.4776	101.783	5.86968	0.971805	0.0734512		NA	NA	NA	NA	NA	NA	NA	NA	NA	NA	NA	NA	NA	NA	NA
	RS-II	NA	NA	NA	NA	NA	NA	NA	NA	NA	NA	NA	NA	NA	NA	NA		876	64.3802	7.58973	26.8312	3.28812	83.0476	11.3632	1.75894	6.43473	98.9952	10.181	101.783	5.86968	0.971805	0.0734512		NA	NA	NA	NA	NA	NA	NA	NA	NA	NA	NA	NA	NA	NA	NA
	RS-III	129	48.11	1.114	27.62	4.388	90.81	11.72	1.81	6.907	97.13	1.2488	107.1	8.2639	0.9047	0.0641		713	57.28	4.589	28.09	3.95	89.5	13.68	1.785	6.69	100.5	11.5	107.6	7.15	0.933	0.0816		167	48.23	1.0756	27.41	5.7843	76.14	11.63	1.667	5.92	87.76	11.35	107.8	11.65	0.8126	0.0737
	SardiNIA	1115	34.2	9	25.4	3.6	72.8	11.3	1.693	6.9	87.3	9.6	97	6.6	0.9	0.06		717	63.2	9.2	28.1	3.8	74.1	11.1	1.624	6.4	96.9	9.4	98.9	6.6	0.98	0.06		1566	34.5	9	23.1	4.1	56.9	10.2	1.568	6.1	76	9.9	95.9	8.2	0.79	0.07
	SEARCH	NA	NA	NA	NA	NA	NA	NA	NA	NA	NA	NA	NA	NA	NA	NA		NA	NA	NA	NA	NA	NA	NA	NA	NA	NA	NA	NA	NA	NA	NA		435	44.1	6.05	27.4	6.14	73	16.2	1.6337	6.61	NA	NA	NA	NA	NA	NA
	SHIP	932	35.6942	8.3325	26.8734	4.0928	85.6548	13.9262	1.78506	0.0656676	91.8194	11.544	101.103	7.64643	0.906052	0.0643773		1073	64.0662	8.34976	28.3893	3.86668	84.544	13.2434	1.72438	0.0647009	99.3192	10.6297	104.349	7.79124	0.950615	0.0549898		1074	35.4385	8.23629	25.2914	4.98155	69.2939	13.7945	1.65576	0.0636804	78.3744	11.9464	99.783	10.9137	0.783622	0.0597542
	SHIP-TREND	220	38.5091	8.21486	26.9284	3.87937	86.3718	13.8929	1.78964	0.0636547	90.5391	11.3625	99.7873	7.69695	0.905755	0.07088		212	62.1934	7.58243	28.7284	3.48672	87.4915	12.1122	1.7441	0.0619559	98.3198	9.54959	102.713	6.79969	0.956444	0.0552479		275	38.96	7.42666	25.9396	4.86908	71.9291	13.6775	1.66575	0.0592878	80.0371	11.4045	98.9633	10.4362	0.808338	0.0725097
	SORBS	204	36	9.8	24.5	4.5	83.3	12.2	1.799	6.3	91	11.1	100.7	6.4	0.9	0.1		171	62.2	8.4	29.4	5.4	86.9	12.9	1.743	6.5	102.3	10.4	103.4	7.1	1	0.1		282	35.2	9.7	25.9	3.6	68.5	12.6	1.67	5.9	80.5	11.7	101.9	8.9	0.8	0.1
	T2D-WTCCC	220	44.4409	4.70122	32.3845	5.80881	101.555	19.6281	176.994	7.49858	109.311	14.8668	111.114	12.2866	0.98397	0.0787768		890	62.5607	7.18291	29.771	5.11507	91.3415	16.7965	175.079	6.83957	105.428	12.9086	107.888	10.4559	0.97653	0.0670259		192	43.4583	4.93925	35.216	7.85805	93.7872	21.5974	163.218	6.72293	106.694	17.9981	119.039	16.6546	0.895906	0.0853834
	THISEAS_cases	48	45.551	3.36688	29.0661	4.73384	87.6609	15.8002	1.7402	0.0749302	99.4875	10.3022	103.766	8.26378	0.960938	0.0591531		258	62.7308	8.34363	29.5507	4.1896	89.1711	14.3106	1.74	0.0766153	104.219	10.9324	105.309	8.06138	0.991124	0.0836448		6	43.5	4.13521	29.9733	6.12982	87.3333	16.4793	1.68333	0.0427395	104.083	21.2613	117	24.5561	0.93	0.0538517
	THISEAS_controls	101	41.45	5.8779	28.5607	4.0592	89.3149	13.01	1.7698	0.0735388	99.8618	9.45689	103.994	8.93744	0.962574	0.0725981		104	63.9539	7.98827	27.6053	3.65048	81.6234	12.1274	1.72077	0.064532	99.646	13.0301	100.93	9.28144	0.986667	0.0628193		82	39.6951	6.88295	25.7832	4.21303	69.9951	12.4385	1.64671	0.060186	85.3603	12.5775	99.8897	16.106	0.838824	0.0975755
	TRAILS	545	19.1889	0.541846	22.6226	3.78324	76.4613	13.8666	1.83757	7.15195	81.7878	9.74258	99.3141	8.37979	0.822749	0.0540695		NA	NA	NA	NA	NA	NA	NA	NA	NA	NA	NA	NA	NA	NA	NA		617	19.1363	0.571429	23.0804	3.7787	66.8443	11.1389	1.70255	6.42503	75.4321	8.89802	100.124	8.68224	0.753225	0.0529653
	TWINGENE	90	49.168	0.468537	25.7639	3.71974	83.3988	11.6849	1.80133	0.0722554	94.4056	9.92355	103.041	6.71955	0.914838	0.0579534		4440	65.8174	7.78843	26.3363	3.53607	81.8477	12.2275	1.76262	0.0662307	97.2874	10.2449	103.217	7.98697	0.943974	0.0899763		133	49.1922	0.551858	24.7268	4.08051	68.075	11.5405	1.6626	0.0646574	83.6447	11.1296	101.563	8.77349	0.822682	0.0762709
	TwinsUK	NA	NA	NA	NA	NA	NA	NA	NA	NA	NA	NA	NA	NA	NA	NA		NA	NA	NA	NA	NA	NA	NA	NA	NA	NA	NA	NA	NA	NA	NA		1147	37.6628	8.61212	24.5791	4.68929	67.1157	13.9515	1.63589	6.21246	77.6683	10.6979	100.518	10.438	0.771684	0.0550031
	ULSAM	NA	NA	NA	NA	NA	NA	NA	NA	NA	NA	NA	NA	NA	NA	NA		1116	71.0037	0.638205	26.2907	3.43114	80.3522	11.533	1.7476	5.98239	94.7752	9.66516	100.217	7.11892	0.944738	0.0534458		NA	NA	NA	NA	NA	NA	NA	NA	NA	NA	NA	NA	NA	NA	NA
	WGHS	NA	NA	NA	NA	NA	NA	NA	NA	NA	NA	NA	NA	NA	NA	NA		NA	NA	NA	NA	NA	NA	NA	NA	NA	NA	NA	NA	NA	NA	NA		6,459 to 7,461	47.7443	1.22329	25.9033	5.29809	70.3159	15.2368	1.64684	6.26819	88.2437	14.9523	106.826	12.8044	0.82388	0.0767755
	YFS	907	37.6869	5.03422	26.7545	4.28221	86.5447	15.643	179.685	6.64437	94.4433	11.9894	99.8307	7.65634	0.944008	0.0698886		NA	NA	NA	NA	NA	NA	NA	NA	NA	NA	NA	NA	NA	NA	NA		1075	37.7805	4.9765	25.3048	5.02018	69.7544	14.5211	1.65993	6.01487	83.5183	12.6231	99.8361	9.81805	0.83452	0.0713927
	Metabochip Studies
	AMC-PAS_cases	368	43.5	5.14	27.13	3.81	88.1	14.84	1.8	0.07	NA	NA	NA	NA	NA	NA		NA	NA	NA	NA	NA	NA	NA	NA	NA	NA	NA	NA	NA	NA	NA		122	42.78	5.62	26.19	5.089	73.08	14.847	1.67	0.065	NA	NA	NA	NA	NA	NA
	CARDIOGENICS_cases	82	45.2805	4.33554	29.0781	4.47746	91.3781	15.9566	1.77049	0.0833985	NA	NA	NA	NA	NA	NA		97	58.2577	4.32116	25.7814	3.24456	81.7938	10.5326	1.78165	0.0585356	NA	NA	NA	NA	NA	NA		9	46.5556	4.33333	25.9444	6.19538	69.9667	19.4652	1.63556	0.0608505	NA	NA	NA	NA	NA	NA
	CARDIOGENICS_controls	51	45.6275	2.59199	26.0451	3.58041	82.9608	10.7535	1.78608	0.0571692	NA	NA	NA	NA	NA	NA		248	60.2177	6.24021	28.35	4.03745	87.2359	14.043	1.7529	0.0667132	NA	NA	NA	NA	NA	NA		85	45.4941	2.6169	25.04	3.68915	68.2118	11.2166	1.64953	0.0560167	NA	NA	NA	NA	NA	NA
	DESIR	1361	39.6899	5.78151	25.0223	3.33121	75.7618	11.0776	1.73953	6.37306	87.8906	9.36011	96.9596	6.35941	0.905466	0.0611947		747	57.9023	4.03335	26.6658	3.21381	77.3396	10.7438	1.7	6.2259	94.1173	8.99278	98.8854	6.36659	0.950209	0.0588603		1154	39.4324	5.85805	23.946	4.10976	61.7307	10.72	1.60655	5.90676	76.0428	9.83612	97.3271	8.7391	0.781219	0.0611495
	DIAGEN non-diabetics	92	42.163	7.98388	27.1245	3.74434	87.55	13.9312	1.79543	0.07722	97.1839	11.6674	103.517	6.75461	0.93718	0.07136		371	67.6577	10.6669	26.8233	3.34904	81.2919	12.2642	1.73927	0.06969	99.6185	9.71179	103.456	7.12445	0.96275	0.06534		139	40.6043	8.9001	26.6603	6.48361	73.3295	19.4203	1.65604	0.06853	86.0568	15.892	104.015	14.802	0.82698	0.09512
	DIAGEN T2D	24	45.2083	4.19087	31.2103	5.51696	97.7125	19.836	1.76542	0.05469	108.5	13.065	107.208	9.46379	1.01033	0.05771		192	66.2552	8.95495	28.9609	4.43545	86.8031	14.203	1.73083	0.06573	106.339	11.4688	106.481	8.5687	0.99799	0.06072		21	44.2857	4.51822	35.196	8.89957	94.0905	27.457	1.62905	0.0641	112.238	20.3664	118.857	18.1942	0.9435	0.08855
	DPS non-diabeticsa	25	45.0984	2.79626	29.6012	4.22201	93.212	15.264	1.77312	0.05379	103.584	9.82992	104.864	9.47567	0.9884	0.04432		91	59.4985	4.08705	29.5329	3.23963	89.9352	11.5543	1.74403	0.06212	102.954	9.22137	104.96	7.03343	0.98011	0.04825		84	45.9117	2.70171	32.6989	5.64826	87.0798	16.4143	1.63035	0.05967	101.811	12.0512	114.024	11.3502	0.89298	0.0589
	DPS T2Da	6	45.73	1.79254	32.5817	3.17507	103.667	13.507	1.78167	0.05382	111.25	10.0468	109.55	5.98891	1.015	0.05753		26	58.3642	4.87365	30.1781	3.00618	91.7846	9.90481	1.74454	0.0594	106.292	8.98256	105.415	6.42493	1.00731	0.04441		13	46.7177	2.28022	33.4715	5.01252	88.6385	16.0813	1.62708	0.08112	101.838	9.15929	113.838	10.1599	0.89538	0.04196
	DRSEXTRA non-diabeticsa	542	66.3678	5.44109	27.1406	3.50698	82.1314	12.402	1.738	0.06087	97.4928	10.0698	98.9297	7.2001	0.98425	0.05202		632	66.4003	5.24421	27.161	4.61613	69.4748	12.2206	1.59961	0.05817	87.4413	11.9908	101.159	9.35766	0.86233	0.06302		103	44.1482	5.2173	31.0469	6.1189	96.7359	20.7239	1.7628	0.07539	105.383	15.2354	106.976	11.6237	0.98387	0.07502
	DRSEXTRA T2Da	60	69.0644	5.87879	29.4051	4.75569	86.745	16.4348	1.7145	0.07071	104.354	12.7886	103.317	10.4083	1.00901	0.05587		61	68.2804	5.7448	32.3856	6.14075	81.8016	16.194	1.58926	0.06196	103.273	14.373	110.287	11.5262	0.93494	0.07072		542	66.3678	5.44109	27.1406	3.50698	82.1314	12.402	1.738	0.06087	97.4928	10.0698	98.9297	7.2001	0.98425	0.05202
	EGCUT MetaboChip (NOT T2D)	160	44	5.1	22.8	5.5	73	17.9	1.79	6.2	none	none	none	none	0.9	0.1		500	62	8.7	25.3	4.1	78	13.8	1.75	6.6	NA	NA	NA	NA	0.9	0.1		318	44	4.93	21.7	2.8	59	8.9	1.65	6	NA	NA	NA	NA	0.8	0.1
	EGCUT MetaboChip (T2D)	NA	NA	NA	NA	NA	NA	NA	NA	NA	NA	NA	NA	NA	NA	NA		301	66	8.3	31.7	4.8	97	16.1	1.75	7.1	NA	NA	NA	NA	1	0.1		NA	NA	NA	NA	NA	NA	NA	NA	NA	NA	NA	NA	NA	NA	NA
	Ely Study	45	41	3.18	27.3	4.04	85.07	13.73	1.77	0.07	97.28	10.51	103.48	6.65	0.938877	0.0646913		634	63.06	7.41	27.28	3.91	82.79	12.95	1.74	0.07	100.1	10.43	105.44	7.54	0.948281	0.0570183		72	42.14	3.11	27.13	7.07	72.41	19.31	1.63	0.06	84.23	14.08	104.65	14.97	0.803819	0.049869
	EMIL SWABIA	510	38.3824	6.77341	27.164	4.73344	85.5206	15.6849	1.77532	6.58662	92.818	11.8828	104.137	8.10309	0.889335	0.0642897		298	58.2852	5.03615	28.7501	4.57296	87.3631	15.3517	1.74	6.44561	99.7258	11.4575	105.541	7.73449	0.943447	0.0627928		571	38.7478	6.56194	25.1739	5.66258	68.8672	16.313	1.65387	6.37663	79.3508	11.9289	100.957	10.7073	0.784672	0.0654996
	EPIC-Norfolk T2D cases	33	47.2	2.26	28.74	3.95	88.53	13.88	1.75	0.06	101.61	10.8	106.77	8.21	0.950583	0.0492801		304	63.71	7.07	28.28	3.51	84.91	12.21	1.73	0.06	101.87	9.63	105.18	7.12	0.968007	0.0553629		21	46.98	2.2	30.44	6.87	81.22	19.56	1.63	0.08	91.9	16.48	111.41	14.05	0.820399	0.0587295
	EPIC-Norfolk T2D sub-cohort	73	47.32	2.39	25.8	2.74	80.03	11.15	1.76	0.09	92.39	8.31	101.83	6.37	0.906913	0.0529335		253	62.64	7.2	25.98	3	78.28	10.34	1.74	0.06	94.06	9.11	101.76	5.47	0.922995	0.0593889		112	46.75	2.39	24.5	3.34	65.43	10.32	1.63	0.06	76.46	9.17	100.76	7.89	0.757648	0.0503362
	EPOGH-FLEMENGHO	280	30.7607	9.35691	25.27	4.18527	80.88	14.49	1.7882	6.36	88.07	11.84	100.57	7.63	0.873	0.076		147	59	7.7904	27.81	4.24	82.08	13.67	1.72	6.444	98.39	11.255	102.95	7.31	0.95	0.071		309	32.48	10.1	23.68	4.45	64.35	12.66	1.6481	5.783	76.36	10.966	99.0951	9.23	0.7688	0.061
	Fenland Study	875	42.34	4.62	26.76	4.08	85.21	14.19	1.78	0.07	95.14	11.09	102.98	7.18	0.922076	0.0631022		529	54.61	2.62	27.49	4.05	86	13.77	1.77	0.07	98.76	11.04	103.6	7.11	0.951778	0.0654249		993	42.59	4.69	26.02	5.53	70.6	15.62	1.65	0.06	83.89	12.69	103.05	11.22	0.812395	0.0645249
	FIN-D2D 2007 non-diabeticsa	200	47.71	1.7381	26.467	3.92803	84.46	14.0923	1.78534	0.06776	96.125	11.2066	98.83	7.09438	0.97073	0.06191		814	62.5405	6.64753	26.907	3.69914	82.7689	13.1209	1.7525	0.06389	98.5249	10.7295	99.7717	6.69549	0.98584	0.06163		242	47.6281	1.66802	26.6951	5.62878	72.8665	16.2257	1.65116	0.05719	88.314	13.4415	101.873	10.8127	0.86438	0.06409
	FIN-D2D 2007 T2Da	22	47.5909	1.68068	28.4861	2.8967	89.5455	13.0717	1.76918	0.06877	102.727	9.1153	100.114	6.67071	1.02572	0.05105		248	64.504	6.55281	30.0797	5.13762	92.502	16.7266	1.75285	0.06126	108.189	12.3431	104.97	9.03424	1.03028	0.05982		10	47	1.88562	33.2315	9.99706	88.44	25.9014	1.6326	0.04269	104.55	22.6243	110.3	16.7766	0.93984	0.07785
	FUSION stage 2 controlsa	325	46.1771	2.18381	26.2077	3.68259	80.9926	13.6815	1.75545	0.06477	93.3111	10.4075	99.8251	6.79637	0.93435	0.0799		718	59.8247	5.57697	26.6336	3.47844	81.1111	12.1486	1.74394	0.06024	95.5729	9.94969	100.607	6.55055	0.94883	0.06213		225	45.8311	2.41556	24.8957	4.34965	66.7547	12.0821	1.63722	0.0518	81.6786	10.9388	98.9129	8.5101	0.82477	0.07348
	FUSION stage 2 T2Da	103	44.1482	5.2173	31.0469	6.1189	96.7359	20.7239	1.7628	0.07539	105.383	15.2354	106.976	11.6237	0.98387	0.07502		482	61.5232	6.35648	30.0078	4.72007	91.3255	16.1796	1.74296	0.06663	105.532	12.7151	106.004	9.16525	0.99414	0.06444		44	45.5349	3.87716	32.7883	7.61801	88.4046	21.4872	1.64043	0.05766	103.186	17.9722	113.535	14.283	0.90465	0.06922
	GLACIER	1609	45.7651	6.42529	25.7926	3.29085	81.3862	11.0582	1.7763	0.0646166	NA	NA	NA	NA	NA	NA		731	59.2969	2.44853	26.6924	3.57286	82.0874	11.6805	1.75361	0.0606299	NA	NA	NA	NA	NA	NA		2511	44.8562	6.75369	25.05	4.08751	67.8555	11.346	1.64614	0.0602223	NA	NA	NA	NA	NA	NA
	HEALTH2006	530	41.3	10.9	25.98	4.1	84.82	15.5	1.805	6.7	92.6	12	100.8	8.3	0.92	0.1		503	60.3	6.6	27.3	4.2	85.6	14.1	1.77	6.4	98.5	11.8	101.7	7.2	1	0.1		693	39.95	10.6	24.7	4.8	68.8	14	1.668	6.3	80.6	11.7	100.9	10	0.797	0.063
	HUNT non-diabeticsb	70	39.5143	8.90976	26.2586	3.39657	83.2486	11.0781	1.78157	0.06687	89.7429	7.50012	101.457	5.66117	0.88379	0.03968		324	69.1327	9.0928	26.5728	3.305	79.9228	11.6896	1.73296	0.06238	94.2623	8.72751	102.08	5.63874	0.92267	0.05778		47	39.766	7.88563	26.7851	4.73038	73.4957	11.8425	1.65957	0.05894	82.9333	10.6246	102.756	10.0976	0.80617	0.0552
	HUNT T2Db	27	44.8148	5.25531	30.2518	5.25543	96.1667	17.3981	1.78185	0.06162	99.7308	11.1698	106.115	8.29133	0.93831	0.04975		272	69.5221	9.10332	27.921	3.49057	84.7485	11.9661	1.74147	0.06162	98.7306	9.31254	104.21	6.42651	0.94701	0.06277		18	44	5.44491	31.7889	6.73183	83.5833	16.9065	1.62278	0.07932	92.1667	14.8651	109.5	12.5803	0.83953	0.07955
	IMPROVE	NA	NA	NA	NA	NA	NA	NA	NA	NA	NA	NA	NA	NA	NA	NA		1650	64.0424	5.34914	27.3895	3.63694	83.5255	13.1573	1.74447	0.0673924	98.7027	10.8145	101.731	8.11287	0.969995	0.069865		NA	NA	NA	NA	NA	NA	NA	NA	NA	NA	NA	NA	NA	NA	NA
	INTER99	1825	42.03	5.62	26.43	3.87	85.58	13.83	1.7986	6.68	91.77	10.53	101.02	8.041	0.907	0.06		865	54.77	3.52	26.9	3.8	84.4	13.3	1.71	6.7	94.3	10.9	101.4	7.4	0.93	0.1		1967	54.46	3.71	26.44	4.56	71.75	13.4	1.6462	6.2	82.29	11.7	102.04	10.89	0.805	0.058
	KORA S3	489	35.2311	5.96865	26.2755	3.37319	82.5566	11.5839	1.77231	6.50888	91.7275	8.98719	102.721	6.12366	0.892033	0.0551596		115	65.0877	7.40911	27.717	3.43031	81.6682	11.5971	1.72	5.96703	97.5435	9.29147	103.865	6.62509	0.938809	0.0602877		550	35.6582	5.82779	24.5392	4.39027	65.9693	11.9353	1.64028	5.95212	77.095	10.0466	100.265	9.22272	0.767724	0.0523373
	KORA S4	426	33.6784	5.20157	25.9424	3.28223	82.3789	11.7943	1.78126	6.50585	91.7749	9.04124	103.771	6.19077	0.883404	0.0539883		159	66.8742	6.92614	28.5593	3.69052	83.4192	11.2635	1.71	6.22827	101.343	9.06219	105.165	6.96309	0.963082	0.0474001		490	33.7299	5.25184	25.0007	4.74401	67.9302	13.4702	1.64919	6.31832	79.4723	11.1335	102.796	9.69498	0.771363	0.055791
	METSIM non-diabeticsa	240	47.8125	1.57459	26.4315	2.98438	84.0479	10.9234	1.78252	0.06721	95.6979	8.72831	100.781	5.20049	0.94865	0.05748		665	56.1564	3.83031	26.3926	3.50411	82.0147	12.1996	1.76198	0.06075	95.9001	9.9409	100.143	6.59379	0.95652	0.05942		NA	NA	NA	NA	NA	NA	NA	NA	NA	NA	NA	NA	NA	NA	NA
	METSIM T2Da	93	48.0215	1.53919	31.0208	5.45309	97.6774	18.4457	1.77328	0.06306	107.898	12.979	106.419	8.39296	1.012	0.06633		1016	61.377	5.6337	30.1428	5.19593	91.9843	16.8582	1.74616	0.05782	107.126	13.3556	104.92	8.94594	1.01923	0.06952		NA	NA	NA	NA	NA	NA	NA	NA	NA	NA	NA	NA	NA	NA	NA
	NSHD	NA	NA	NA	NA	NA	NA	NA	NA	NA	NA	NA	NA	NA	NA	NA		1216	53	0	27.36	3.93	83.43	13.1	1.75	0.06	97.66	10.44	104.14	6.88	0.936504	0.0607853		NA	NA	NA	NA	NA	NA	NA	NA	NA	NA	NA	NA	NA	NA	NA
	SCARFSHEEP cases	187	47.1084	3.07833	27.3639	3.66183	86.7893	13.3994	1.78	0.06	99.4494	10.1871	101.777	7.49329	0.977068	0.0593228		608	59.5046	5.35161	26.789	3.61648	83.4562	12.7348	1.77	0.07	98.847	9.85135	101.978	7.33889	0.968856	0.0584141		40	47.3396	2.7592	27.2191	5.19642	74.3325	14.693	1.65	0.07	88.4902	13.3152	101.639	10.9031	0.873396	0.069668
	SCARFSHEEP controls	208	47.5323	2.10005	25.4413	3.55302	82.75	12.4052	1.8	0.07	94.0508	9.92176	97.7142	7.87631	0.964713	0.0908275		789	60.0196	5.48493	25.9625	3.45135	81.6355	11.6158	1.78	0.06	96.4625	9.669	100.302	7.49844	0.961942	0.0637369		50	47.8923	2.07758	24.7946	3.19439	68.534	9.04473	1.67	0.04	83.4738	10.2094	98.3323	7.89599	0.849385	0.0837943
	STR	NA	NA	NA	NA	NA	NA	NA	NA	NA	NA	NA	NA	NA	NA	NA		235	72.7983	9.35545	25.1396	3.3913	79.0231	10.7762	1.75	6.80246	97.0461	9.29945	101.332	8.02007	0.957827	0.0529256		NA	NA	NA	NA	NA	NA	NA	NA	NA	NA	NA	NA	NA	NA	NA
	TROMSO non-diabeticsb	106	44.7736	4.81522	25.9802	2.88607	82.1689	10.9388	1.77717	0.06052	98.9375	7.34087	107.562	5.03869	0.91939	0.04246		248	63.5242	7.94767	25.7145	3.46624	78.627	12.6684	1.74649	0.06245	94.0312	9.99995	102.809	6.40113	0.91331	0.06099		73	42.0959	6.65658	24.8206	3.87839	67.7118	9.99538	1.65411	0.06691	84	14.0949	102.25	5.85235	0.81838	0.09756
	TROMSO T2Db	107	44.8224	4.81901	29.4935	4.16543	92.0038	15.3441	1.76421	0.0721	104.365	9.52004	107.327	6.35601	0.9716	0.05468		245	63.3878	7.96462	28.2347	3.93081	85.9231	14.0423	1.74286	0.07232	101.967	10.5135	105.617	7.10072	0.96483	0.06982		73	42.0959	6.65658	30.4397	5.53644	81.9225	16.5348	1.63808	0.05765	105.286	13.9936	119.357	8.01412	0.87981	0.07889
	Whitehall II metabochip	1015	44.86	2.93	25.14	3.13	78.76	10.82	1.77	0.06	86.8	9.18	97.12	5.92	0.892597	0.0578613		539	55.52	2.88	25.26	2.75	78.68	10.04	1.76	0.07	88.49	8.44	97.48	5.36	0.906981	0.0583906		283	44.89	3.14	24.75	4.56	66.44	12.86	1.64	0.06	72.37	10.73	96.28	9.19	0.7496	0.0582241
	a These studies were analysed together (see study "D2D2007, DPS, DR'S EXTRA, FUSION stage 2, and METSIM" in Table S2) b These studies were analysed together (see study "HUNT 2 and Tromsø" in Table S2)
[truncated: 15 more columns]
