# Supplementary material for: The Influence of Age and Sex on Genetic Associations with Adult Body Size and Shape: A Large-Scale Genome-Wide Interaction Study
Source: PLoS Genet. 2015 Oct 1;11(10):e1005378. doi: 10.1371/journal.pgen.1005378 (PMC4591371; doi:10.1371/journal.pgen.1005378)
Supplement: S5 Table — The table is ordered according to Table 2. (XLSX) [file pgen.1005378.s021.xlsx]

## Sheet: Table S5 - WHR sexdiff loci ext
	SNP	SE-Approach*	OE-Approach**	Nearest Gene	Other Nearby Genes/Elements	Allelesa	Frequency effect allele (%)		Women								Men
									Age ≤ 50 yrs				Age > 50 yrs				Age ≤ 50 yrs				Age > 50 yrs
						Effect/Other			b	p	n		b	p	n		b	p	n		b	p	n		PAgediff	PAge&SexDiff	POverall	PJoint4df
	rs2820443	yes	yes	LYPLAL1	SLC30A10, RNU5F−1, BPNT1, EPRS, LOC643723	T/C	0.715263		0.0613	4.553e-14	41152.9		0.0635	1.443e-23	70538		-0.0063	0.462	36286.9		0.0037	0.583	57493.3		0.401667	0.603228	9.51e-20	4.24e-33
	rs998584	yes	yes	VEGFA	SLC22A7, DLK2, XPO5, RSPH9, LOC100132354, MRPL4, SLC35B2, CRIP3, ABC10, POLH, C6orf223, TMEM63B, TCTE1, ZNF318, TJAP1, GTPBP2, CAPN11, LRRC73, MAD2L1BP, SLC29A1, YIPF3, MRPS18A, POLR1C, HSP90AB1, MIR4647, NFKBIE, TMEM151B	A/C	0.48488		0.0636	2.277e-14	39766		0.0574	1.507e-19	69767.2		0.0225	0.0103	32895.4		0.0106	0.116	54281.7		0.242163	0.708297	6.75e-26	3.14e-31
	rs6717858	yes	yes	COBLL1	SNORA70F, GRB14, SLC38A11, SCN3A	T/C	0.588547		0.0623	1.064e-16	40574.8		0.0483	1.133e-16	69534.7		-0.0044	0.59	33666.7		-0.0118	0.0626	56591.9		0.108648	0.638213	2.06e-13	1.46e-29
	rs4616635	yes	yes	ADAMTS9	ADAMTS9−AS2, MIR548A2, PRICKLE2	C/G	0.72049		0.0477	2.753e-09	43213.8		0.0503	2.272e-15	70807.2		0.0021	0.809	36240.5		0.0114	0.101	57438.9		0.418169	0.657312	1.41e-16	6.32e-21
	rs2811434	yes	yes	PLXND1	RAB43, COPG1, RPL32P3, RHO, TMCC1, TRH, ALG1L2, ISY1−RAB43, H1FX, EFCAB12, H1FOO, LOC100507032, FAM86HP, ISY1, C3orf37, MBD4, CNBP, H1FX−AS1, IFT122, SNORA7B	T/G	0.792434		0.041	3.965e-05	35580.9		0.0488	4.004e-10	56332.7		-0.0076	0.502	26885.7		-0.0035	0.704	39856.1		0.443039	0.848103	2.19e-07	1.5e-11
	rs1936811	yes		RSPO3	RNF146, ECHDC1, KIAA0408, SOGA3	T/A	0.6104		0.0419	4.923e-07	36080.9		0.0439	2.12e-11	55780.6		0.0224	0.017	27002.9		0.0094	0.22	40432.9		0.609457	0.351446	2.08e-15	6.34e-16
	rs10743579	yes		ITPR2	MIR4302; LOC100506451; RASSF8; BHLHE41; SSPN	A/C	0.245996		0.0377	5.628e-05	34933.7		0.0461	4.356e-10	56101.2		0.0219	0.0371	27002.5		0.0192	0.0253	40175.6		0.651126	0.538775	3.51e-14	3.24e-13
	rs6958350	yes		NFE2L3	RNU6-16; MIR148A; HNRNPA2B1; CBX3; SNX10	T/C	0.250023		0.047	7.284e-09	43838.9		0.0329	5.185e-07	70920		0.0096	0.274	36045.9		0.0199	0.0061	55248.4		0.722541	0.114164	8.48e-14	8.17e-14
	rs1443512	yes		HOXC13	PCBP2; MAP3K12; TARBP2; NPFF; ATF7; LOC100652999; ATP5G2; CALCOCO1; HOXC-AS5; HOXC12; HOTAIR; HOXC11; HOXC10; MIR196A2; HOXC9; HOXC8; HOXC6; HOXC5; HOXC4; MIR615; FLJ12825; LOC100240735; LOC100240734; LOC400043; SMUG1; CBX5; MIR3198-2; HNRNPA1; HNRNPA1P10; NFE2; COPZ1; MIR148B; GPR84; ZNF385A; ITGA5	A/C	0.236373		0.0383	5.596e-06	43399.9		0.038	1.151e-08	71086		0.0271	0.00427	33110.9		0.0094	0.201	55700.5		0.292113	0.280136	3.61e-13	6.84e-13
	rs7830933	yes	yes	NKX2-6	STC1; NKX3-1; CHMP7; R3HCC1; LOXL2; LOC100507156; SLC25A37	A/G	0.766228		0.0388	3.206e-06	44135.9		0.0364	2.803e-08	71915.8		-0.0108	0.239	36268.8		0.0009	0.901	57235.2		0.596992	0.37181	7.56e-07	5.45e-11
	rs11057396	yes		CCDC92	ZNF664, DNAH10; RILPL2; SNRNP35; RILPL1; MIR3908; TMED2; DDX55; EIF2B1; GTF2H3; TCTN2; ATP6V0A2; ZNF664-FAM101A; FAM101A; NCOR2	A/C	0.670321		0.0381	6.803e-05	28294.9		0.0358	4.189e-07	50193.8		0.0122	0.272	20223.8		0.0007	0.935	33565.5		0.535919	0.617244	6.39e-08	1.21e-08
	rs1294404	yes		LY86	LY86-AS1; F13A1; RREB1	A/G	0.611392		0.034	3.227e-06	44409.8		0.035	1.888e-09	71913.8		0.0102	0.2	36271.8		0.0194	0.0022	56396.1		0.480375	0.552651	8.71e-15	4.1e-14
	rs9687846	yes		MAP3K1	ANKRD55; SETD9; MIER3	A/G	0.187202		0.0491	1.556e-07	44110.4		0.0257	0.0004175	71895		0.0078	0.444	36249.8		-0.0053	0.517	57460.3		0.0333486	0.55951	8.85e-06	2.72e-08
	rs6018158	yes		EYA2	ZNF663; SLC13A3; MKRN7P; ZNF334; TP53RK; SLC2A10; OCSTAMP; MIR3616; ZMYND8; LOC100131496	T/C	0.407016		0.0365	5.374e-06	36149.9		0.0303	2.637e-06	57325.9		0.0109	0.225	27122.8		0.0125	0.0938	40489.3		0.745607	0.61621	3.9e-10	1.49e-09
	rs745578	yes		EYA1	MSC; RNU6-83; LOC100132891; TRPA1	A/G	0.243701		0.037	9.225e-05	35804.9		0.0298	6.947e-05	57158.4		0.0193	0.0742	27002.7		0.0031	0.727	40176.1		0.234316	0.626279	2.95e-07	6.1e-07
	rs1045241	yes	yes	TNFAIP8	DTWD2; MIR1244-1; MIR1244-3; MIR1244-2; DMXL1; HSD17B4; FAM170A	C/T	0.71		0.0347	1.179e-05	44406.8		0.0312	8.831e-07	71906.7		-0.0011	0.898	36269.8		-0.0001	0.988	57484.1		0.839918	0.763301	1.91e-06	8.64e-09
	rs7492628	yes		RPS6KA5	C14orf159; TTC7B; SNORA11B; GPR68; CCDC88C; SMEK1; CATSPERB	G/C	0.3018		0.0341	0.0001157	35493.8		0.0292	4.753e-05	56151.4		0.0168	0.0928	26754.7		0.0008	0.923	39274.4		0.255781	0.520345	7e-07	6.65e-07
	rs17819328	yes		PPARG	TSEN2, RAF1, TMEM40, IQSEC1, SYN2, TIMP4, LOC100129480, CAND2, MKRN2, RPL32, SNORA7A	G/T	0.43114		0.0347	9.035e-06	40077.2		0.0288	1.819e-06	69548.9		0.0008	0.924	32995.5		0.006	0.351	55654.3		0.914582	0.442497	1.27e-07	8.7e-09
	rs12443634		yes	CMIP	CMC2; CENPN; ATMIN; C16orf46; GCSH; PKD1L2; BCMO1; GAN; MIR4720; LOC100129617; PLCG2	A/C	0.287082		0.0275	0.002118	36042.8		0.0327	3.801e-06	57145.3		-0.0035	0.732	26985.7		-0.0127	0.139	39065.7		0.970137	0.411806	0.000802383	1.13e-06
	rs4656767	yes		GORAB	PRRX1, LOC284688, MIR3119−1, MIR3119−2, METTL11B, KIFAP3	A/C	0.709288		0.0336	2.21e-05	44233.8		0.0259	4.485e-05	71447.8		0.0035	0.686	35752.8		0.0073	0.294	55270.2		0.735948	0.444744	4.83e-07	3.01e-07
	rs13029520	yes		MEIS1	MEIS1−AS3, MIR4778	T/C	0.397265		0.0441	1.706e-07	31776.9		0.019	0.003225	55074.5		0.0049	0.609	23678.9		0.0091	0.235	38411.9		0.122504	0.0710164	5.7e-07	1.3e-07
	rs2092029	yes		HMGXB4	ISX; HMOX1; TOM1; MCM5; MIR3909; RASD2; APOL6; MB; APOL5; RBFOX2	C/T	0.3262		0.0197	0.0195	35071.9		0.0324	1.14e-06	56337		0.0014	0.889	23849.9		0.0053	0.501	39751.5		0.261058	0.597168	9.9e-06	5.89e-06
	rs6971365		yes	KLF14	CPA4; CEP41; CPA5; MEST; CPA1; MESTIT1; MIR335; COPG2; TSGA13; MIR29A; MIR29B1; LOC646329; FLJ43663; MKLN1	C/T	0.29999		0.0176	0.02626	44133.9		0.0332	1.047e-07	71908.9		-0.0072	0.406	36285.8		-0.0055	0.429	56130.2		0.187789	0.354251	0.00079217	5.79e-07
	rs9991328	yes		FAM13A	HERC6; HERC5; PIGY; PYURF; HERC3; NAP1L5; FAM13A-AS1; TIGD2; GPRIN3	T/C	0.485312		0.0336	2.197e-06	43064.9		0.0229	6.284e-05	68869		0.0131	0.091	35492.9		0.0033	0.59	57071.4		0.109186	0.946633	4.63e-08	2.04e-08
	rs7917772	yes		SFXN2	ELOVL3; PITX3; GBF1; NFKB2; PSD; C10orf95; FBXL15; CUEDC2; MIR146B; LOC100505761; TMEM180; ACTR1A; SUFU; TRIM8; ARL3; WBP1L; CYP17A1; AS3MT; C10orf32; C10orf32-AS3Mt; CNNM2; NT5C2	A/G	0.616637		0.0265	0.0004165	43056.8		0.0269	3.894e-06	70924.9		0.0066	0.413	35354.8		-0.0021	0.744	55401.2		0.617318	0.516414	8.18e-06	5.74e-07
	rs2956993	yes		GANAB	INCENP; SCGB1D1; SCGB2A1; SCGB1D2; SCGB2A2; SCGB1D4; ASRGL1; SCGB1A1; AHNAK; EEF1G; MIR3654; TUT1; EML3; ROM1; B3GAT3; INTS5; C11orf48; MTA2; BSCL2; C11orf83; UBXN1; LRRN4CL; GNG3; TTC9C; ZBTB3; POLR2G; TMEM179B; SNORD22; NXF1; TAF6L; TMEM223; STX5; WDR74; SNHG1; SLC3A2; CHRM1; SLC22A6; SLC22A8; SLC22A24	G/T	0.38		0.0305	7.692e-05	41769.9		0.024	5.189e-05	70067		-0.0057	0.501	34261.9		0.0103	0.121	55785.5		0.584868	0.120911	2.42e-06	4.94e-07
	rs8066985	yes		KCNJ2	KCNJ16; KCNJ2-AS1	A/G	0.508507		0.0272	0.0001268	44133.9		0.0252	1.064e-05	70134		0.0089	0.251	36281.9		0.0018	0.769	57236.4		0.486892	0.704464	8.63e-07	3.69e-07
	rs17185536		yes	SIM1	MCHR2; LOC728012; ASCC3	C/T	0.7562		0.0203	0.03979	32822.9		0.0268	0.0003468	55779.9		-0.0054	0.633	24635.9		-0.0236	0.00868	38225.3		0.740511	0.194604	0.109183	7.49e-05
	rs9648211		yes	ISPD	AGMO; MEOX2; LOC100506025; LRRC72; SOSTDC1	A/G	0.568195		0.0226	0.005413	35870.6		0.0239	0.0002113	57325.1		-0.0156	0.0928	27123.4		-0.0074	0.328	40487.5		0.539436	0.66315	0.0203789	4.49e-05
	rs3805389		yes	NMU	PDCL2, CLOCK, TMEM165, KDR, SRD5A3, SRD5A3−AS1, LOC644145, EXOC1, CEP135	A/G	0.278104		0.0152	0.06808	40002.9		0.027	2.097e-05	70894		0.0031	0.733	32985.9		-0.0228	0.00122	55623.4		0.511739	0.0153274	0.0798746	1.91e-06
	rs3088050	yes		NSD1	UNC5A; HK3; UIMC1; ZNF346; FGFR4; RAB24; PREUD1; MXD3; LMAN2; SLC34A1; PRR7-AS1; PFN3; RGS14; F12; GRK6; PRR7; DDX41; PDLIM7; DBN1; DOK3; FAM193B; TMED9; B4GALT7; LOC202181; FAM153A	A/G	0.20973		0.0164	0.06684	42834.9		0.0056	0.4218	70098		0.05	2.46e-07	35254.9		0.0267	0.000495	56177.5		0.0403525	0.456073	1.13e-07	1.15e-08
	rs6088735	yes		EDEM2	PIGU; TP53INP2; NCOA6; HMGB3P1; GGT7; ACSS2; GSS; MYH7B; MIR499A; MIR499B; TRPC4AP; PROCR; EIF6; MMP24; FAM83C; UQCC; GDF5; CEP250; ERGIC3; C20orf173; SPAG4; FER1L4; CPNE1; RBM12	C/T	0.7665		0.0098	0.2453	43335.9		0.0078	0.2414	70930		0.0387	2.48e-05	35382.9		0.0333	6.02e-06	55399.4		0.628142	0.831017	8.1e-08	2.71e-08
	rs7307410		yes	LEMD3	WIF1; RASSF3; GNS; TBC1D30; FLJ41278; MSRB3	C/G	0.261345		-0.0026	0.7788	33944.9		-0.0068	0.3505	55281.7		0.0399	0.000107	26150.9		0.0279	0.00087	38934.2		0.33677	0.660338	0.00825903	1.95e-05
	rs6088552		yes	PIGU	ASIP; AHCY; ITCH; MIR644A; DYNLRB1; MAP1LC3A; TP53INP2; NCOA6; HMGB3P1; GGT7; ACSS2; GSS; MYH7B; MIR499A; MIR499B; TRPC4AP; EDEM2	G/A	0.3707		-0.011	0.132	44412.9		-0.0051	0.3814	71907		0.0292	0.000242	36264.9		0.0177	0.00597	56131.4		0.741563	0.209218	0.0731609	7.74e-05
	rs972303		yes	CDH10	LOC340107	T/C	0.746602		0.003	0.7538	33218.8		-0.0159	0.03891	54083		0.0269	0.012	25090.7		0.0356	4.16e-05	39280.5		0.444236	0.134964	0.0347885	1.6e-05
	rs4898764		yes	GNPNAT1	PTGER2; TXNDC16; GPR137C; ERO1L; PSMC6; STYX; FERMT2; DDHD1	A/G	0.471167		0.0162	0.02445	43337.9		0.0116	0.03895	70926		-0.0199	0.0113	35370.9		-0.0142	0.025	55391.5		0.935942	0.449153	0.990468	0.000351686
	rs17470444		yes	SGCZ	MIR383	A/G	0.712939		-0.0288	0.001863	31175.8		-0.0051	0.471	55295.8		0.028	0.00711	23550.7		0.0293	0.000472	37696.1		0.13185	0.206288	0.310493	5.71e-06
	rs2069664		yes	IQGAP2	F2R	G/A	0.5258		-0.0155	0.05336	34489.9		-0.0141	0.02631	53958		0.0218	0.0151	25969.9		0.0171	0.0219	39112.6		0.782829	0.694269	0.96148	0.000541202
	rs741361		yes	SLC2A3	CD163L1; CD163; APOBEC1; GDF3; DPPA3; CLEC4C; NANOGNB; NANOG; SLC2A14; FOXJ2; C3AR1; NECAP1; CLEC4A; POU5F1P3; ZNF705A; FAM66C; FAM90A1; FAM86Fp; LOC389634	A/G	0.599184		-0.0073	0.3809	34459.9		-0.0216	0.0009829	55306		0.0225	0.0177	25940		0.0215	0.00564	38830.7		0.231972	0.411837	0.995838	5.23e-05
	rs2673140		yes	IRS1	LOC646736, MIR5702	G/A	0.38261		-0.0217	0.003387	43509.9		-0.0141	0.01552	70883		0.0157	0.0543	35730.9		0.0192	0.00286	56540.4		0.402979	0.770092	0.703985	1.95e-05
	rs2042995		yes	TTN	OSBPL6, DFNB59, PRKRA, FKBP7, PLEKHA3, MIR548N, TTN−AS1, CCDC141, SESTD1	C/T	0.2256		-0.0225	0.01866	35071.9		-0.0154	0.0426	56336		0.015	0.165	26212.9		0.0263	0.00277	40009.5		0.34514	0.820667	0.843399	0.000393345
	rs10881574		yes	RXRA	VAV2; LINC00094; BRD3; WDR5; RNU6ATAC; MIR4669; COL5A1	C/T	0.07		-0.0484	0.004346	33863.9		-0.0223	0.0992	55135		0.0583	0.00371	24825.9		0.0358	0.0276	37656.4		0.736492	0.149805	0.936237	7.54e-05
	rs7042428		yes	PTPRD	C9orf123	A/G	0.977283		-0.0483	0.1126	35702.9		-0.0555	0.01725	64174.9		0.1086	0.000909	28586.9		0.0513	0.0455	50823.3		0.250145	0.375789	0.73286	0.000116057
	rs17809093		yes	CECR2	CECR7; CECR5; CECR3; IL17RA; CECR6; CECR5-AS1; CECR1; SLC25A18; ATP6V1E1; BCL2L13; BID; MIR3198-1; MICAL3; MIR648	G/C	0.037		-0.0814	0.005655	25436		-0.0489	0.041	42532		0.0863	0.00818	18870		0.0609	0.0256	29024		0.85546	0.309629	0.817529	8.74e-05
	*SE-Approach: Initial Filter on pOverall<1e-5 and subsequent screen on FDR(pSexDiff)<5%, FDR(pHet)<5% and FDR(pAgeDiff)<5% in selected SNPs
	** OE-Approach: Genome-wide screen on FDR(pSexDiff)<5%, FDR(pHet)<5% and FDR(pAgeDiff)<5%
	a Effect allele is according to the WHR increasing allele in all men and women.
