# Supplementary material for: The Influence of Age and Sex on Genetic Associations with Adult Body Size and Shape: A Large-Scale Genome-Wide Interaction Study
Source: PLoS Genet. 2015 Oct 1;11(10):e1005378. doi: 10.1371/journal.pgen.1005378 (PMC4591371; doi:10.1371/journal.pgen.1005378)
Supplement: S8 Table — Abbreviations: Effect Allele (EA), Other Allele (OA), Odds Ratio (OR). (XLSX) [file pgen.1005378.s024.xlsx]

## Sheet: Table S8 - T2D, MAGIC (WHR)
								T2D GWAS								T2D Metabochip								Fasting Insulin								Fasting Glucose								HOMA-B								HOMA-IR
								WOMEN			MEN					WOMEN			MEN					WOMEN			MEN					WOMEN			MEN					WOMEN			MEN					WOMEN
	SNP	Nearest Gene	EAb	OA	SexdiffType	StrongerSex		OR	P	N	OR	P	N	PSexdiff		OR	P	N	OR	P	N	PSexdiff		β	P	N	β	P	N	PSexdiff		β	P	N	β	P	N	PSexdiff		β	P	N	β	P	N	PSexdiff		β	P
	rs2820443	LYPLAL1	T	C	SE	WOMEN		1.07588	0.0129198	12861	1.04915	0.0841583	14203	0.534134		1.06474	0.000526492	35831	1.02376	0.145092	45404	0.105189		0.018539	4.8e-06	44074	0.015007	0.000439	41428	0.548304		0.004776	0.136851	62024	0.004747	0.164103	57271	0.995061		0.016475	0.010455	13401	0.011729	0.051983	15441	0.590541		0.019818	0.009265
	rs998584	VEGFA	A	C	CED	WOMEN		0.995736	0.877666	16056	1.06044	0.0363638	16612	0.11058		1.02142	0.22005	36812	1.03726	0.021742	43797	0.512858		0.007759	0.085031	38446	0.000891	0.845844	36525	0.285146		0.001022	0.780266	50807	0.001409	0.708118	47825	0.941254		-0.001634	0.822721	7064	-0.0072	0.261789	10032	0.566721		-0.0054	0.545427
	rs6717858	COBLL1	T	C	SE	WOMEN		1.06764	0.00785595	16056	0.991937	0.736554	16612	0.0326674		1.08152	1.41e-06	39023	1.04085	0.006408	47812	0.0800397		0.015976	2.03e-05	42787	0.004546	0.24674	40460	0.0351718		0.00458	0.124051	60682	0.003209	0.311264	56208	0.752558		0.01212	0.047222	11868	0.004168	0.462908	14315	0.340238		0.012327	0.08876
	rs4616635	ADAMTS9	C	G	SE	WOMEN		1.07983	0.00435491	16056	1.0834	0.00269802	16612	0.930728		1.09517	3.49e-07	39018	1.0674	4.72e-05	47794	0.284268		0.006031	0.144351	44060	-0.001559	0.716836	41414	0.202946		0.008621	0.008721	62019	0.00182	0.604223	57193	0.157282		0.003591	0.590738	13399	-0.005703	0.358154	15437	0.307976		0.007747	0.324554
	rs2811434	PLXND1	T	G	SE	WOMEN		1.05578	0.0627501	16021	1.03586	0.213308	16612	0.639309		-	-	-	-	-	-	-		0.018306	0.000511	32066	0.007356	0.213119	26058	0.166491		0.007269	0.09536	43772	0.005731	0.244455	36530	0.815065		-0.042374	0.131674	2340	0.004708	0.875496	2248	0.252547		0.000868	0.976399
	rs1936811	RSPO3	T	A	CED	WOMEN		0.990389	0.719799	12861	0.995075	0.848583	14203	0.899367		-	-	-	-	-	-	-		0.010213	0.022398	30458	0.004386	0.374862	24399	0.381972		0.001028	0.788144	37785	-0.001867	0.658207	31640	0.611205		-0.015632	0.592367	777	-0.017532	0.601867	612	0.965953		-0.046599	0.162235
	rs10743579	ITPR2	A	C	CED	WOMEN		1.07585	0.0173309	12861	1.0139	0.635891	14203	0.161371		-	-	-	-	-	-	-		0.008482	0.088907	32066	0.008633	0.121426	26058	0.983891		-0.001289	0.755974	43762	8.8e-05	0.984816	36522	0.824945		-0.000574	0.982702	2339	-0.010066	0.706721	2247	0.800982		0.013378	0.61162
	rs6958350	NFE2L3	T	C	CED	WOMEN		1.01998	0.470138	16056	1.02791	0.306706	16612	0.840315		1.01696	0.352331	39026	1.02827	0.082664	47812	0.647613		0.011501	0.006184	42789	0.005118	0.249363	40460	0.296428		0.003826	0.256488	60676	-0.001383	0.701033	56201	0.291165		0.00378	0.567613	11868	0.00218	0.732171	14315	0.861665		0.007305	0.358054
	rs1443512	HOXC13	A	C	CED	WOMEN		1.01465	0.640756	12861	0.95674	0.139514	14203	0.173812		0.992368	0.691624	35829	0.991743	0.628328	45400	0.98053		0.000712	0.865917	44071	0.008098	0.06506	41425	0.224995		-0.000871	0.798466	61997	0.0072	0.045729	57283	0.1037		0.003582	0.595197	13398	0.005397	0.39455	15438	0.844496		0.011134	0.160445
	rs7830933	NKX2-6	A	G	SE	WOMEN		1.0433	0.191005	12861	1.0331	0.283816	14203	0.824873		1.03932	0.0499368	35826	1.039	0.028004	45393	0.990721		-0.004553	0.296029	44072	0.011692	0.009889	41427	0.00975692		-0.002388	0.478147	64229	0.008589	0.015978	59400	0.0251649		0.003165	0.65822	12623	0.005451	0.404	14829	0.813438		0.007628	0.300918
	rs11057396	CCDC92	A	C	SE	WOMEN		1.08143	0.0811621	5117	1.01963	0.67341	4871	0.360601		-	-	-	-	-	-	-		0.00806	0.113566	25865	0.003643	0.508154	21366	0.55592		0.000693	0.871151	32185	0.005228	0.258209	28255	0.471247		0.035257	0.092664	2339	0.013739	0.504691	2247	0.464053		0.002608	0.898202
	rs1294404	LY86	A	G	CED	WOMEN		1.01138	0.674671	12861	1.0007	0.978326	14203	0.776036		0.9969	0.852973	35832	0.988857	0.452489	45398	0.718012		0.005717	0.132287	42788	-0.002886	0.466574	40460	0.117095		0.008898	0.003479	60677	-0.00072	0.823289	56204	0.0301245		0.001894	0.762981	11091	0.006424	0.26972	13703	0.596819		0.007494	0.319501
	rs9687846	MAP3K1	A	G	SE	WOMEN		1.0814	0.0201714	12861	1.09614	0.00462771	14203	0.772175		1.05481	0.0142151	34815	1.0837	3.25e-05	44565	0.353363		0.009626	0.051153	42453	0.006735	0.198507	40088	0.687891		0.005185	0.191388	60159	0.002227	0.599861	55421	0.610711		0.016411	0.045542	11538	8e-06	0.999171	13959	0.143958		0.012266	0.216034
	rs6018158	EYA2	T	C	CED	WOMEN		1.00897	0.716241	16056	0.979166	0.385639	16612	0.385208		-	-	-	-	-	-	-		-0.001815	0.678093	32066	-0.00336	0.485733	26058	0.812331		-0.001799	0.609295	43769	-0.001931	0.623338	36526	0.980045		-0.005976	0.7625	2339	-0.016079	0.399407	2247	0.713125		-0.005726	0.764213
	rs745578	EYA1	A	G	SE	WOMEN		1.08065	0.0107248	12861	0.971715	0.337095	14203	0.0126883		-	-	-	-	-	-	-		0.001817	0.724397	32066	0.010104	0.080552	26058	0.284669		-0.004992	0.239354	43715	0.008505	0.072152	36483	0.0336406		-0.0241	0.597299	1563	0.0078	0.840101	1636	0.593701		0.0042	0.914984
	rs1045241	TNFAIP8	C	T	SE	WOMEN		0.968101	0.230984	16056	1.02755	0.315034	16612	0.119361		1.01584	0.375306	39020	1.01081	0.502524	47802	0.835553		0.003696	0.368049	44071	-0.00218	0.612968	41425	0.323591		0.002153	0.499043	64273	-0.002085	0.53411	59448	0.359458		0.002023	0.758562	12623	-0.001659	0.78855	14827	0.683543		0.007697	0.251637
	rs7492628	RPS6KA5	G	C	SE	WOMEN		1.03174	0.237006	16056	1.08908	0.00113382	16612	0.14616		-	-	-	-	-	-	-		-0.002521	0.603684	32062	-0.010948	0.041328	26056	0.244295		-0.003533	0.365849	43758	0.000691	0.87536	36518	0.473084		0.033715	0.126798	2336	-0.023256	0.284594	2246	0.0659521		-0.005737	0.791395
	rs17819328	PPARG	G	T	SE	WOMEN		1.03641	0.203898	12861	1.04912	0.0820179	14203	0.757034		1.013	0.443853	35828	1.02373	0.121022	45402	0.641687		0.008977	0.020437	44073	0.006726	0.097333	41425	0.688142		0.002827	0.337881	64211	0.00672	0.031425	59364	0.364835		-0.001808	0.76264	12624	0.010961	0.050178	14827	0.119233		0.007522	0.217601
	rs12443634	CMIP	A	C	SE	WOMEN		1.05321	0.0855616	12286	1.03647	0.228255	13457	0.705158		-	-	-	-	-	-	-		0.004712	0.327534	32066	-0.000496	0.926228	26058	0.469709		0.006235	0.112923	43675	0.000673	0.878171	36446	0.345469		-0.0154	0.633354	1563	0.0306	0.285784	1636	0.286668		0.0065	0.816015
	rs4656767	GORAB	A	C	SE	WOMEN		1.02243	0.454177	12861	0.971509	0.304019	14203	0.211134		1.03958	0.0350179	34707	0.999764	0.988599	42922	0.114349		0.003327	0.416707	43264	-0.001472	0.738866	38633	0.425643		-0.002609	0.408301	63439	0.001608	0.636123	56326	0.363111		0.007681	0.251242	11815	-0.001717	0.802111	13217	0.32651		0.002592	0.706262
	rs13029520	MEIS1	T	C	SE	WOMEN		0.956274	0.0949168	12861	0.974944	0.3194	14203	0.600908		-	-	-	-	-	-	-		0.007686	0.084509	30458	0.005948	0.22636	24399	0.793364		0.002103	0.579763	37785	0.004404	0.293922	31644	0.684292		0.019658	0.500961	777	0.083119	0.014457	612	0.156689		0.007834	0.814667
	rs2092029	HMGXB4	C	T	SE	WOMEN		1.0327	0.25238	12861	1.01673	0.532353	14203	0.687074		-	-	-	-	-	-	-		0.002189	0.627231	32066	0.011987	0.016125	26058	0.144675		0.002853	0.434426	43770	0.009414	0.021007	36530	0.230599		-0.032914	0.101706	2340	-0.008326	0.677316	2247	0.386075		0.015193	0.430511
	rs6971365	KLF14	C	T	SE	WOMEN		1.13289	2e-05	12861	1.04907	0.0942859	14203	0.0604195		1.0864	4.51e-06	35832	1.01081	0.505775	45403	0.0029324		0.009174	0.024288	42786	-0.003247	0.448409	40456	0.0355728		0.005514	0.091103	60640	0.001104	0.751375	56165	0.355771		-0.007724	0.24911	11088	-0.001175	0.852367	13699	0.476866		-0.009902	0.216023
	rs9991328	FAM13A	T	C	SE	WOMEN		1.03544	0.188682	12861	1.051	0.0506394	14203	0.68477		1.04834	0.00393653	35832	1.04267	0.004295	45404	0.804899		0.008564	0.01825	44071	0.008672	0.023723	41422	0.983674		0.006355	0.025339	63924	0.004882	0.10583	59155	0.722303		-0.000929	0.874661	13397	-0.000896	0.869976	15435	0.996726		0.009419	0.117161
	rs7917772	SFXN2	A	G	SE	WOMEN		1.04283	0.127466	12861	1.00188	0.942905	14203	0.292065		0.992584	0.658833	35829	1.0161	0.287424	45403	0.299652		0.000493	0.896576	44072	0.006515	0.100859	41425	0.272868		0.001198	0.691844	61953	0.005371	0.093428	57230	0.343236		0.002463	0.685316	12623	0.007312	0.198663	14828	0.560259		0.005058	0.48379
	rs2956993	GANAB	G	T	SE	WOMEN		1.02661	0.358876	12861	0.990354	0.721197	14203	0.362184		1.00372	0.830657	35809	0.991681	0.58814	45401	0.603373		-0.003533	0.369758	44074	-0.003232	0.432983	41424	0.957891		-0.00354	0.246668	64248	0.000576	0.858237	59429	0.35431		-0.006396	0.310728	12625	-0.002809	0.631735	14826	0.677037		-0.006784	0.310316
	rs8066985	KCNJ2	A	G	SE	WOMEN		1.00655	0.802974	12861	0.996092	0.877399	14203	0.774515		0.995663	0.790375	35828	0.989965	0.492073	45404	0.793959		0.003112	0.404016	42787	0.003075	0.432218	40460	0.99454		-0.000543	0.855496	60680	0.002691	0.393978	56207	0.456311		0.008827	0.14532	11865	-0.002355	0.674652	14315	0.175753		0.006937	0.336693
	rs17185536	SIM1	C	T	OED	WOMEN		0.98452	0.619502	12861	0.951888	0.103951	14203	0.440159		-	-	-	-	-	-	-		-0.002586	0.62334	30458	-0.008881	0.131101	24399	0.425206		0.002855	0.526775	37744	-0.006608	0.189098	31612	0.161432		-	-	-	-	-	-	-		-	-
	rs9648211	ISPD	A	G	SE	WOMEN		1.0194	0.477654	12861	1.01405	0.59274	14203	0.88856		-	-	-	-	-	-	-		-0.002703	0.541064	32066	0.00723	0.14274	26058	0.133781		-0.004521	0.211366	43687	0.003394	0.402183	36467	0.145046		0.0066	0.822218	1563	0.0083	0.747125	1636	0.965283		0.001	0.968746
	rs3805389	NMU	A	G	OED	WOMEN		1.07752	0.0115311	12861	1.00076	0.978459	14203	0.0696047		1.03246	0.080538	35826	1.00137	0.933152	45399	0.211816		0.009882	0.014457	44073	-0.005514	0.195711	41424	0.00874894		0.005084	0.106033	64149	-0.007517	0.024196	59342	0.00597917		0.001937	0.768312	12625	0.00731	0.236203	14828	0.551271		0.003303	0.621509
	rs3088050	NSD1	A	G	SE	MEN		0.985872	0.630348	16056	0.944619	0.0500642	16612	0.30265		0.955471	0.0192905	39023	0.940862	0.000512	47814	0.556578		0.002955	0.512322	44073	0.004649	0.322974	41428	0.794905		0.00166	0.639194	64285	-0.000522	0.887537	59461	0.669673		0.002364	0.741572	13401	0.005753	0.389021	15442	0.729413		-0.006152	0.412682
	rs6088735	EDEM2	C	T	SE	MEN		0.955888	0.145394	12861	0.971486	0.332043	14203	0.706642		0.944579	0.00298	35824	0.980261	0.24583	45396	0.150054		-0.002314	0.58859	44074	-0.001485	0.740237	41426	0.893526		-0.004967	0.134501	64279	0.002751	0.434134	59439	0.11054		-0.002341	0.734779	13401	-0.003513	0.584843	15441	0.901176		-0.007845	0.269525
	rs7307410	LEMD3	C	G	SE	MEN		0.98635	0.644254	12861	1.02772	0.341869	14203	0.320925		-	-	-	-	-	-	-		0.002957	0.544678	32066	0.007366	0.173689	26058	0.545357		-0.001598	0.682865	43768	0.004639	0.291684	36532	0.289388		0.009769	0.648827	2339	0.011208	0.589988	2247	0.961586		0.018531	0.370382
	rs6088552	PIGU	G	A	SE	MEN		0.969912	0.257571	12861	0.957777	0.096641	14203	0.736716		0.979297	0.216085	35826	0.964434	0.01749	45387	0.501722		-0.003194	0.397842	44068	0.004998	0.208176	41424	0.135019		-0.006215	0.038762	62025	-0.003054	0.342809	57288	0.473008		-0.009352	0.129308	13395	0.007919	0.16654	15439	0.0400901		-0.01514	0.036729
	rs972303	CDH10	T	C	SE	MEN		1.00813	0.794776	12861	0.994259	0.849895	14203	0.750263		-	-	-	-	-	-	-		0.012065	0.018201	32065	0.002198	0.695157	26058	0.193386		0.001421	0.728461	43725	0.002773	0.545946	36484	0.826035		-0.0023	0.936489	1563	0.0203	0.423024	1636	0.556318		0.0149	0.553314
	rs4898764	GNPNAT1	G	A	OED	MEN		1.0105	0.690132	12861	1.00932	0.71541	14203	0.9743		1.00203	0.901372	35829	0.997283	0.852942	45406	0.82893		0.004087	0.26777	44074	0.00453	0.239908	41427	0.933823		0.000708	0.803905	64248	0.001098	0.716138	59438	0.925223		0.010859	0.066497	13401	0.008933	0.106447	15440	0.812075		0.003351	0.584295
	rs17470444	SGCZ	A	G	OED	MEN		1.0137	0.606606	16056	0.966371	0.186341	16612	0.196133		-	-	-	-	-	-	-		0.000924	0.846977	32052	0.010976	0.03742	26048	0.158275		-1e-06	0.999713	43736	0.009129	0.032497	36495	0.111573		-0.007938	0.70748	2336	0.0213	0.295525	2243	0.319328		-0.023468	0.250663
	rs2069664	IQGAP2	G	A	OED	MEN		1.02543	0.291031	16056	0.991733	0.723952	16612	0.317678		-	-	-	-	-	-	-		-0.009344	0.028253	32066	0.003459	0.461646	26058	0.0435084		9.8e-05	0.977217	43774	0.005594	0.143782	36533	0.284747		-0.00899	0.640406	2340	-0.009384	0.613957	2248	0.988255		-0.01326	0.474554
	rs741361	SLC2A3	A	G	OED	MEN		0.998745	0.958853	16056	0.981657	0.440217	16612	0.613556		-	-	-	-	-	-	-		0.00431	0.323537	32021	-0.003183	0.510125	26015	0.249901		0.005605	0.114545	43698	-0.0035	0.379011	36478	0.0878134		0.002478	0.90193	2296	-0.013082	0.510704	2207	0.582256		0.015775	0.420273
	rs2673140	IRS1	G	A	OED	MEN		0.92891	0.0027754	16056	0.92314	0.000948768	16612	0.85686		0.910432	1.16e-08	38614	0.922072	6.05e-08	46942	0.56791		-0.007949	0.03898	42447	-0.021651	8.97e-08	40082	0.0141536		-0.000462	0.881638	60183	-0.004534	0.169291	55439	0.368387		-0.005689	0.371792	11533	-0.012255	0.038658	13949	0.450435		-0.002386	0.753214
	rs2042995	TTN	C	T	OED	MEN		0.994801	0.868006	12861	1.05027	0.100077	14203	0.209972		-	-	-	-	-	-	-		0.011145	0.027293	32066	0.012492	0.025179	26058	0.857913		-0.001166	0.779515	43753	0.003319	0.473087	36521	0.471256		0.031789	0.208227	2339	0.048228	0.036927	2247	0.631128		0.020684	0.398375
	rs10881574	RXRA	C	T	OED	MEN		1.00313	0.954573	13955	0.881758	0.0224061	14155	0.0972754		-	-	-	-	-	-	-		0.008306	0.365257	31543	-0.006351	0.536518	25486	0.287299		0.004948	0.499788	43271	-0.00697	0.389795	35991	0.275508		-0.0457	0.482464	1563	-0.0473	0.393381	1636	0.985064		0.0756	0.184532
	rs7042428	PTPRD	A	G	OED	MEN		0.922501	0.451584	11581	0.899149	0.314673	12913	0.864758		0.96032	0.543499	32470	0.889962	0.074591	34804	0.41509		0.016436	0.38886	27024	0.008105	0.66818	26499	0.756415		0.034608	0.016641	36869	-0.004741	0.751849	35771	0.0588069		-0.019231	0.530762	6807	-0.003283	0.897231	8996	0.688956		-0.000577	0.98742
	rs17809093	CECR2	G	C	OED	MEN		1.03573	0.685326	12006	1.01754	0.840816	11617	0.884955		0.96012	0.464887	32570	1.02319	0.631312	39119	0.385864		0.011269	0.5278	19495	0.002109	0.896736	24483	0.704368		-0.00232	0.856729	28345	-0.006204	0.628317	31857	0.830539		0.025448	0.284083	6912	-0.002695	0.885953	10290	0.352841		0.017796	0.484107
	a Loci are ordered by largest to smallest effect on WHR in Women.
	b Effect allele is according to the WHR increasing allele according to the associated sex (see Table 2).
[truncated: 5 more columns]
