# Supplementary material for: The Influence of Age and Sex on Genetic Associations with Adult Body Size and Shape: A Large-Scale Genome-Wide Interaction Study
Source: PLoS Genet. 2015 Oct 1;11(10):e1005378. doi: 10.1371/journal.pgen.1005378 (PMC4591371; doi:10.1371/journal.pgen.1005378)
Supplement: S9 Table — Abbreviations: Effect Allele (EA), Other Allele (OA), Odds Ratio (OR). (XLSX) [file pgen.1005378.s025.xlsx]

## Sheet: Table S9 - BP (WHR)
								Diastolic Blood Pressure (DBP)								Systolic Blood Pressure (SBP)
								WOMEN			MEN					WOMEN			MEN
	SNPa	Nearest Gene	EAb	OA	SexdiffType	StrongerSex		β	P	N	β	P	N	PSexdiff		β	P	N	β	P	N	PSexdiff
	rs2820443	LYPLAL1	T	C	SE	WOMEN		-0.107415	0.338036	28150.9	-0.189182	0.0526559	26631.9	0.582321		0.134441	0.410043	30229.6	0.0572035	0.683686	26238.4	0.719756
	rs998584	VEGFA	A	C	CED	WOMEN		0.0894545	0.580112	12305.2	0.14836	0.312942	10507.6	0.78752		0.432463	0.0677856	13749.1	0.405765	0.0846912	10410.8	0.936261
	rs6717858	COBLL1	T	C	SE	WOMEN		0.0227895	0.825722	27389.4	0.0249043	0.78766	24732.4	0.987842		0.123871	0.420762	28658.7	0.176228	0.184931	24884	0.796793
	rs4616635	ADAMTS9	C	G	SE	WOMEN		0.207348	0.0665295	28153.3	0.129879	0.183956	26527.9	0.604127		0.240695	0.145603	30231.2	0.111289	0.447855	25381.3	0.558241
	rs2811434	PLXND1	T	G	SE	WOMEN		-0.0386115	0.746998	30530.3	-0.0423092	0.693899	26901.9	0.981662		0.0294136	0.870003	30562.2	0.0520085	0.736443	26544.4	0.924055
	rs1936811	RSPO3	T	A	CED	WOMEN		-0.309986	0.0283497	19247.3	-0.00134775	0.991667	13750.2	0.106898		-0.128682	0.562675	16905.5	-0.0207739	0.923638	12753.5	0.728164
	rs10743579	ITPR2	A	C	CED	WOMEN		0.121147	0.289341	30601	0.332749	0.00112888	26842.2	0.167617		0.296503	0.100961	29666.9	0.515026	0.000412957	26487.3	0.346778
	rs6958350	NFE2L3	T	C	CED	WOMEN		0.293819	0.0825913	16813.1	0.0436937	0.765127	13520.8	0.263507		0.394234	0.115635	16570.8	0.265943	0.278488	12543	0.71452
	rs1443512	HOXC13	A	C	CED	WOMEN		0.0970732	0.418822	26196.1	0.0654163	0.539377	25518.8	0.843691		0.293364	0.117393	27683.4	0.0933017	0.537024	25124.9	0.405916
	rs7830933	NKX2-6	A	G	SE	WOMEN		0.133604	0.496447	12242.5	0.0188441	0.913142	7701.89	0.6609		0.235542	0.440593	10097.6	0.317903	0.266755	8554.39	0.844021
	rs1294404	LY86	A	G	CED	WOMEN		0.0455009	0.749617	18672.6	0.0510853	0.707041	12586.4	0.977383		0.408475	0.069756	16436.5	-0.211008	0.291109	13238.4	0.0396735
	rs9687846	MAP3K1	A	G	SE	WOMEN		0.283874	0.116553	17771.7	-0.0564233	0.733552	12849.5	0.165428		0.55197	0.0643344	15902.6	-0.196873	0.442824	12723	0.0570377
	rs6018158	EYA2	T	C	CED	WOMEN		0.061474	0.559737	26479.4	-0.0638061	0.491735	22293.8	0.372345		0.107793	0.491162	27641.7	-0.0719374	0.586563	23015.2	0.380561
	rs745578	EYA1	A	G	SE	WOMEN		0.221447	0.277654	14649.6	0.315317	0.0852595	9208.97	0.732087		0.337671	0.25053	11632.3	0.504694	0.0770913	9042.54	0.683523
	rs1045241	TNFAIP8	C	T	SE	WOMEN		-0.0515244	0.745607	17726	0.241756	0.0983482	12805.4	0.174336		-0.119503	0.626759	15657.7	0.29434	0.231552	11847.3	0.234002
	rs7492628	RPS6KA5	G	C	SE	WOMEN		0.145317	0.19469	26135.8	0.155383	0.124176	23683.8	0.946812		0.238062	0.156841	27594.3	0.340183	0.0183694	23956	0.644846
	rs17819328	PPARG	G	T	SE	WOMEN		0.114058	0.280081	26137.8	0.0726988	0.436964	24183.6	0.769363		0.232612	0.143454	26954.7	-0.0838659	0.549992	22875.3	0.135561
	rs12443634	CMIP	A	C	SE	WOMEN		0.156455	0.177642	25885.9	0.00801264	0.938697	23141.5	0.341208		0.269573	0.126106	27420.6	-0.104278	0.483463	23653.9	0.105059
	rs4656767	GORAB	A	C	SE	WOMEN		0.316735	0.00416212	29301.9	-0.0695799	0.483878	25890.1	0.00935143		0.238338	0.152329	29363.1	-0.16082	0.276738	24747.4	0.0730545
	rs13029520	MEIS1	T	C	SE	WOMEN		0.0604502	0.547526	30531.5	0.142591	0.11165	26833.1	0.541891		0.140669	0.374705	29666.9	0.156717	0.222049	26471.4	0.937274
	rs2092029	HMGXB4	C	T	SE	WOMEN		0.198411	0.066104	28050.3	0.110373	0.249582	25172	0.542022		0.223019	0.164466	29199.6	-0.105536	0.442248	25261.1	0.119761
	rs6971365	KLF14	C	T	SE	WOMEN		0.337655	0.0573559	12804.7	-0.0498134	0.75287	10170.6	0.103365		0.521563	0.0564694	11402.9	-0.227908	0.334916	10901	0.0381162
	rs9991328	FAM13A	T	C	SE	WOMEN		0.0532867	0.613049	24786.4	0.217615	0.018862	23538.1	0.241565		0.070884	0.667093	24568.6	0.265238	0.0520385	23392.1	0.363769
	rs7917772	SFXN2	A	G	SE	WOMEN		0.0381565	0.71222	29369.6	0.201472	0.0285247	25994.1	0.238095		0.104128	0.503541	29420.2	0.107882	0.431517	24712.6	0.985566
	rs2956993	GANAB	G	T	SE	WOMEN		0.178218	0.101221	26388.3	-0.126334	0.190732	24041.9	0.0362333		0.273571	0.0921139	27696.2	-0.177286	0.2	23991.3	0.0345791
	rs8066985	KCNJ2	A	G	SE	WOMEN		-0.0531419	0.60054	27800.8	0.0891771	0.322824	25109.3	0.29456		-0.159906	0.293873	29002.8	0.0824293	0.526267	25156.2	0.22637
	rs17185536	SIM1	C	T	OED	WOMEN		0.0687171	0.691836	14414.9	-0.100649	0.53205	11910.7	0.474175		0.101847	0.705029	14479.6	-0.148245	0.543777	11742	0.49125
	rs9648211	ISPD	A	G	SE	WOMEN		-0.21588	0.146277	16413.6	-0.0320841	0.807469	12999.7	0.35456		-0.10869	0.625579	16090.6	-0.0159987	0.941718	12065.2	0.766583
	rs3805389	NMU	A	G	OED	WOMEN		0.279354	0.0120048	29662	-0.0944686	0.349731	25245.9	0.0128421		0.327789	0.0489525	29556.9	-0.176603	0.216767	25476.1	0.0215346
	rs3088050	NSD1	A	G	SE	MEN		0.0127136	0.939099	19340.1	0.0817242	0.600584	13814.2	0.762292		0.069149	0.792986	16961.8	-0.126261	0.591344	13634.8	0.580061
	rs6088735	EDEM2	C	T	SE	MEN		0.015263	0.910971	22497.9	0.23011	0.0640234	19307.1	0.244441		-0.0235432	0.905688	23139.3	-0.0755065	0.658019	20210.1	0.842715
	rs7307410	LEMD3	C	G	SE	MEN		0.0388159	0.745368	25280.1	-0.255773	0.0171344	24688	0.0666415		0.224479	0.203548	26457.2	-0.366406	0.0161488	22756	0.0112731
	rs6088552	PIGU	G	A	SE	MEN		-0.00160409	0.988168	25212	0.16825	0.0811162	24667.2	0.241209		-0.0735898	0.664454	25510.1	0.0903675	0.507388	22727.9	0.451231
	rs972303	CDH10	T	C	SE	MEN		-0.0701665	0.665155	17929.3	0.126284	0.394662	12934	0.371355		-0.272231	0.292356	15915.9	0.0611659	0.78815	12811	0.333106
	rs4898764	GNPNAT1	G	A	OED	MEN		-0.217008	0.0411015	24995.7	-0.1329	0.158673	24440.3	0.553781		-0.297813	0.0745508	25159.9	-0.418541	0.00171675	22454.8	0.572299
	rs17470444	SGCZ	A	G	OED	MEN		0.00192806	0.990329	16947.6	-0.257904	0.0641378	13512.9	0.219147		-0.274841	0.308177	15680.9	0.0512862	0.810051	13337	0.342966
	rs2069664	IQGAP2	G	A	OED	MEN		0.0303623	0.835442	15096.4	-0.0562058	0.675674	12476.8	0.662796		-0.285085	0.207388	15142.7	-0.210103	0.299761	12299.4	0.804936
	rs741361	SLC2A3	A	G	OED	MEN		-0.0333586	0.756506	25359.8	-0.0389857	0.683158	23761.6	0.9688		-0.127397	0.442176	27563.7	-0.0417513	0.764934	23816.7	0.692731
	rs2673140	IRS1	G	A	OED	MEN		-0.0631065	0.552154	26854.1	-0.178457	0.0529429	24069.9	0.411985		-0.130735	0.396212	29062.8	-0.301462	0.0228062	24359.7	0.400735
	rs2042995	TTN	C	T	OED	MEN		-0.0294357	0.807482	28459.2	0.0611106	0.560676	26757.8	0.57163		-0.0703576	0.688836	30425.5	0.0456394	0.761378	26367.3	0.615885
	rs10881574	RXRA	C	T	OED	MEN		0.0208706	0.942886	17987.2	0.510168	0.0521292	12848	0.212265		0.0370486	0.93548	16162.8	0.668584	0.0917407	12806.3	0.296964
	rs7042428	PTPRD	A	G	OED	MEN		0.168915	0.789159	12467.7	-0.0194432	0.970958	10527.2	0.819873		1.12975	0.28727	12680	-0.528314	0.535049	10474.7	0.223144
	rs17809093	CECR2	G	C	OED	MEN		0.0649309	0.874009	7404.35	-0.247888	0.499756	9296.36	0.569577		0.228727	0.706751	12253.3	-0.391671	0.441347	10929.7	0.43385
	* missing rs11057396 locus near CCDC92, order # 11.
	a Loci are ordered by largest to smallest effect on WHR in Women.
	b Effect allele is according to the BMI increasing allele according to the associated age-group (see Table 1).
