# Supplementary material for: The Influence of Age and Sex on Genetic Associations with Adult Body Size and Shape: A Large-Scale Genome-Wide Interaction Study
Source: PLoS Genet. 2015 Oct 1;11(10):e1005378. doi: 10.1371/journal.pgen.1005378 (PMC4591371; doi:10.1371/journal.pgen.1005378)
Supplement: S12 Table — (XLSX) [file pgen.1005378.s028.xlsx]

## Sheet: Table S12 - GWASCatalog WHR
	Chr	Sex strata with highest ǀβǀ	Current Study (CS) SNPa	CS position	Previously Identified (PI) SNP	PI position	Distance (bp) between PI and CS SNP	r2	PI Nearby Gene	Disease/Trait	PUBMEDID	P-value	OR/β	PI Risk Allele	PI EAF	PI Total Sample Size
	1	Women	rs2820443	217820132	rs2605100	217710847	109285	0.615286	LYPLAL1	Adiposity	19557161	3e-08	0.04	G	0.692	140644
	1	Women	rs2820443	217820132	rs11118316	217723786	96346	0.344572	LYPLAL1	Visceral adipose tissue/subcutaneous adipose tissue ratio	22589738	3e-09	NR	A	0.44	10557
	1	Women	rs2820443	217820132	rs2820464	217759843	60289	0.823975	LYPLAL1	Waist-hip ratio	23563607	7e-09	1.16	G	0.66	16958
	1	Women	rs2820443	217820132	rs2785980	217767142	52990	0.823975	LYPLAL1	Fasting insulin-related traits (interaction with BMI)	22581228	2e-08	NR	NR	NR	85573
	1	Women	rs2820443	217820132	rs3001032	217794402	25730	0.962965	LYPLAL1	Adiponectin levels	22479202	4e-08	-0.02	T	0.7	39883
	1	Women	rs2820443	217820132	rs11118346	217810342	9790	0.470504	LYPLAL1	height	20881960	1.9e-12	-0.02	T	0.47	183727
	1	Women	rs2820443	217820132	rs11118346	217810342	9790	0.470504	LYPLAL1	Height	20881960	2e-12	-0.03	T	0.47	183727
	1	Women	rs2820443	217820132	rs2820443	217820132	0	1	LYPLAL1, SLC30A10, ZC3H11B	Sexual dimorphism in anthropometric traits	23754948	7e-16	NR	T	NR	270775
	6	Women	rs998584	43865874	rs998584	43865874	0	1	VEGFA	Triglycerides	24097068	3e-15	0.49	A	0.49	188577
	6	Women	rs998584	43865874	rs998584	43865874	0	1	VEGFA	HDL cholesterol	24097068	2e-11	-0.03	A	0.49	188577
	6	Women	rs998584	43865874	rs998584	43865874	0	1	VEGFA	Adiponectin levels	22479202	3e-08	0.03	C	0.5	39883
	6	Women	rs998584	43865874	rs1358980	43872529	6655	0.856065	VEGFA	Sexual dimorphism in anthropometric traits	23754948	2e-11	NR	T	NR	270775
	6	Women	rs998584	43865874	rs9472155	44005705	139831	0.110778	MGC45491, VEGF	Vascular endothelial growth factor levels	21757650	2e-26	NR	T	0.22	5254
	6	Women	rs998584	43865874	rs11755845	44012758	146884	0.121452	VEGFA	Thyroid hormone levels	23408906	2e-10	-0.07	T	0.266	26420
	2	Women	rs6717858	165247907	rs3923113	165210095	37812	0.731381	GRB14	Type 2 diabetes	21874001	1e-08	1.09	A	0.74	58587
	2	Women	rs6717858	165247907	rs10195252	165221337	26570	0.863806	COBLL1	Triglycerides	20686565	2e-10	-2.01	C	0.4	96598
	2	Women	rs6717858	165247907	rs13389219	165237122	10785	0.932225	COBLL1	Waist-hip ratio	23563607	3e-08	1.13	C	0.57	16958
	2	Women	rs6717858	165247907	rs6717858	165247907	0	1	COBLL1, SNORA70F, GRB14	Sexual dimorphism in anthropometric traits	23754948	6e-16	NR	T	NR	270775
	2	Women	rs6717858	165247907	rs12328675	165249046	1139	0.11422	COBLL1	HDL cholesterol	20686565	3e-10	0.68	C	0.13	99900
	2	Women	rs6717858	165247907	rs12328675	165249046	1139	0.11422	COBLL1	HDL cholesterol	24097068	2e-15	0.05	C	0.13	188577
	2	Women	rs6717858	165247907	rs7607980	165259447	11540	0.11422	COBLL1, GRB14	Fasting insulin-related traits (interaction with BMI)	22581228	4e-20	NR	NR	NR	85573
	3	Women	rs4616635	64677315	rs6795735	64680405	3090	0.461256	ADAMTS9	Age-related macular degeneration	23455636	5e-09	1.1	T	0.46	77255
	3	Women	rs4616635	64677315	rs4607103	64686944	9629	0.722092	ADAMTS9	Type 2 diabetes	18372903	1e-08	1.09	C	0.76	89920
	6	Women	rs1936811	127425553	rs13209747	127157147	268406	0.132863	RSPO3	Blood pressure	23972371	2e-11	0.56	T	0.19	130137
	6	Women	rs1936811	127425553	rs13209747	127157147	268406	0.132863	RSPO3	Blood pressure	23972371	3e-10	0.85	T	0.19	130137
	6	Women	rs1936811	127425553	rs13204965	127208765	216788	0.126174	RSPO3	Bone mineral density	21533022	3e-08	-0.07	C	NR	22853
	6	Women	rs1936811	127425553	rs13204965	127208765	216788	0.126174	RSPO3	FNBMD (Females)	22504420	1.9e-12	0.05	A	0.76	62050
	6	Women	rs1936811	127425553	rs13204965	127208765	216788	0.126174	RSPO3	Bone mineral density	22504420	8e-12	0.04	A	0.76	83894
	6	Women	rs1936811	127425553	rs13204965	127208765	216788	0.126174	RSPO3	FNBMD	22504420	8.12e-12	0.04	A	0.76	83894
	6	Women	rs1936811	127425553	rs13204965	127208765	216788	0.126174	RSPO3	LSBMD	22504420	3.61e-10	0.04	A	0.76	77508
	6	Women	rs1936811	127425553	rs1936800	127477757	52204	0.376388	RSPO3	HDL cholesterol	24097068	3e-10	0.02	C	0.49	188577
	6	Women	rs1936811	127425553	rs1936800	127477757	52204	0.376388	RSPO3	Renal function-related traits (BUN)	22797727	1e-11	0.01	T	0.5	57178
	6	Women	rs1936811	127425553	rs9491697	127497815	72262	0.235489	Intergenic	Crohn's disease	23128233	4e-10	1.08	G	0.439	77064
	6	Women	rs1936811	127425553	rs7741021	127509967	84414	0.307374	RSPO3	Bone properties (heel)	24430505	9e-21	0.06	C	0.47	49627
	6	Women	rs1936811	127425553	rs7741021	127509967	84414	0.307374	RSPO3	Bone properties (heel)	24430505	1e-19	0.06	C	0.47	49892
	6	Women	rs1936811	127425553	rs7741021	127509967	84414	0.307374	RSPO3	Bone properties (heel)	24430505	4e-08	NR	NR	NR	6792
	6	Women	rs1936811	127425553	rs6569474	127535304	109751	0.356981	RSPO3	Metabolite levels	21909109	1e-08	-0.01	A	0.47	42940
	6	Women	rs1936811	127425553	rs7745274	127550850	125297	0.406679	RSPO3	Waist-hip ratio	23563607	9e-10	1.15	A	0.55	16958
	12	Women	rs10743579	26352412	rs718314	26344550	7862	1	ITPR2	Renal cell carcinoma	22010048	9e-10	1.19	NR	NR	14687
	7	Women	rs6958350	25838458	rs1055144	25837634	824	0.701992	NFE2L3	Waist-hip ratio	20935629	1e-24	0.04	T	0.21	190803
	7	Women	rs6958350	25838458	rs12700667	25868164	29706	0.787786	Intergenic	Endometriosis	23104006	4e-09	1.18	A	0.744	19058
	7	Women	rs6958350	25838458	rs12700667	25868164	29706	0.787786	Intergenic	Endometriosis	21151130	1e-09	1.2	A	0.74	14917
	12	Women	rs11057396	122985015	rs4765127	123026120	41105	0.960321	ZNF664	HDL cholesterol	24097068	8e-10	0.03	T	0.35	188577
	12	Women	rs11057396	122985015	rs4765127	123026120	41105	0.960321	ZNF664	Triglycerides	24097068	2e-08	-0.03	T	0.35	188577
	12	Women	rs11057396	122985015	rs4765127	123026120	41105	0.960321	CCDC92,ZNF664	HDL cholesterol	20686565	3e-10	0.44	T	0.34	99900
	12	Women	rs11057396	122985015	rs4765127	123026120	41105	0.960321	CCDC92,ZNF664	Triglycerides	20686565	1e-08	-2.42	G	0.34	96598
	6	Women	rs1294404	6680021	rs1294421	6688148	8127	0.726484	LY86	Waist-hip ratio	23563607	2e-10	1.16	G	0.62	16958
	5	Women	rs9687846	55897651	rs9686661	55897543	108	0.792401	MAP3K1	Triglycerides	24097068	3e-16	0.04	T	0.2	188577
	5	Women	rs9687846	55897651	rs9686661	55897543	108	0.792401	ANKRD55,MAP3K1	Triglycerides	20686565	1e-10	2.57	T	0.2	96598
	3	Women	rs17819328	12464342	rs7616006	12242648	221694	0.207658	SYN2	PLT	22139419	4.86e-08	1.997	A	NR	58564
	3	Women	rs17819328	12464342	rs7616006	12242648	221694	0.207658	SYN2	Platelet counts	22139419	5e-08	2	A	NR	67504
	3	Women	rs17819328	12464342	rs2290159	12603920	139578	0.17151	RAF1	Cholesterol, total	20686565	4e-09	-1.42	C	0.22	100184
	3	Women	rs17819328	12464342	rs2290159	12603920	139578	0.17151	RAF1	Cholesterol, total	24097068	2e-09	-0.04	C	0.23	188577
	16	Women	rs12443634	80081775	rs2925979	80092291	10516	0.883955	CMIP	Adiponectin levels	24105470	2e-10	-0.08	T	0.411	18079
	16	Women	rs12443634	80081775	rs2925979	80092291	10516	0.883955	CMIP	HDL cholesterol	24097068	1e-19	-0.04	T	0.31	188577
	16	Women	rs12443634	80081775	rs2925979	80092291	10516	0.883955	CMIP	Adiponectin levels	22479202	3e-21	-0.04	T	0.3	29347
	16	Women	rs12443634	80081775	rs2925979	80092291	10516	0.883955	CMIP	HDL cholesterol	20686565	2e-11	-0.45	T	0.3	99900
	2	Women	rs13029520	66626466	rs3891585	66610480	15986	1	MEIS1	PR interval	23139255	1e-11	2.13	A	0.43	13415
	2	Women	rs13029520	66626466	rs11897119	66625504	962	0.969831	MEIS1	PR interval	20062060	5e-11	1.36	C	0.39	28517
	2	Women	rs13029520	66626466	rs2300478	66634957	8491	0.298856	MEIS1	Restless legs syndrome	21779176	3e-49	1.68	G	0.24	12137
	2	Women	rs13029520	66626466	rs2300478	66634957	8491	0.298856	MEIS1	Restless legs syndrome	17637780	3e-28	1.74	G	0.24	4384
	22	Women	rs2092029	33982241	rs138777	34041098	58857	0.796135	TOM1	Cholesterol, total	24097068	5e-08	0.02	A	0.36	188577
	7	Women	rs6971365	130083021	rs4731702	130083924	903	0.216186	KLF14	HDL cholesterol	24097068	5e-17	0.03	T	0.49	188577
	7	Women	rs6971365	130083021	rs4731702	130083924	903	0.216186	KLF14	HDL cholesterol	20686565	1e-15	0.59	T	0.48	99900
	7	Women	rs6971365	130083021	rs972283	130117394	34373	0.228344	KLF14	Type 2 diabetes	20581827	2e-10	1.07	G	NR	141454
	4	Women	rs9991328	89932144	rs3822072	89960292	28148	0.941174	FAM13A	HDL cholesterol	24097068	4e-12	-0.03	A	0.46	188577
	10	Women	rs7917772	104477433	rs3850699	104404211	73222	0.181121	ACTR1A, ARL3, AS3MT, C10orf32, C10orf32-AS3MT, C10orf95	Prostate cancer	23535732	5e-10	1.1	A	0.71	61925
	10	Women	rs7917772	104477433	rs1004467	104584497	107064	0.135527	CYP17A1	Systolic blood pressure	19430479	1e-10	1.05	A	0.9	63569
	10	Women	rs7917772	104477433	rs11191454	104649994	172561	0.132515	AS3MT	Autism spectrum disorder, attention deficit-hyperactivity disorder, bipolar diso	23453885	1e-08	1.13	NR	0.91	30545
	10	Women	rs7917772	104477433	rs12413409	104709086	231653	0.132515	CNNM2	Intracranial aneurysm	20364137	1e-09	1.29	G	0.91	20072
	10	Women	rs7917772	104477433	rs12413409	104709086	231653	0.132515	CYP17A1, CNNM2, NT5C2	Coronary heart disease	21378990	1e-09	1.12	G	0.89	143677
	10	Women	rs7917772	104477433	rs12413409	104709086	231653	0.132515	YP17A1, CNNM2, NT5C2	Coronary artery disease or large artery stroke	24262325	2e-08	NR	NR	NR	100321
	10	Women	rs7917772	104477433	rs11191548	104836168	358735	0.132515	CYP17A1, AS3MT, CNNM2, NT5C2	Systolic blood pressure	19430483	7e-24	1.16	T	0.91	147669
	10	Women	rs7917772	104477433	rs11191548	104836168	358735	0.132515	CNNM2, NT5C2, CYP17A1	Blood pressure	21572416	4e-17	1.18	T	0.74	50373
	10	Women	rs7917772	104477433	rs11191548	104836168	358735	0.132515	CNNM2, NT5C2, CYP17A1	Blood pressure	21572416	7e-12	0.58	T	0.74	50373
	10	Women	rs7917772	104477433	rs11191548	104836168	358735	0.132515	CYP17A1, NT5C2	Blood pressure	21909110	8e-11	0.53	T	0.94	122671
	10	Women	rs7917772	104477433	rs11191548	104836168	358735	0.132515	CYP17A1, NT5C2	Systolic blood pressure	21909115	7e-26	1.1	T	0.91	202756
	10	Women	rs7917772	104477433	rs11191580	104896201	418768	0.132515	NT5C2	Schizophrenia	21926974	3e-08	1.2	T	0.91	51695
	10	Women	rs7917772	104477433	rs11191580	104896201	418768	0.132515	NT5C2, CNNM2, other genes	Schizophrenia	22688191	2e-09	1.23	NR	NR	30518
	10	Women	rs7917772	104477433	rs11191580	104896201	418768	0.132515	NT5C2	Autism spectrum disorder, attention deficit-hyperactivity disorder, bipolar diso	23453885	1e-08	NR	NR	0.911	30545
	10	Women	rs7917772	104477433	rs11191593	104929205	451772	0.132515	CYP17A1, NT5C2	Blood pressure	21909110	1e-15	0.66	T	0.94	122671
	17	Women	rs8066985	65964940	rs623011	65771041	193899	0.229049	KCNJ2	Thyrotoxic hypokalemic periodic paralysis	22399142	4e-12	5.47	A	0.45	228
	17	Women	rs8066985	65964940	rs312691	65837933	127007	0.267539	KCNJ16, KCNJ2	Thyrotoxic hypokalemic periodic paralysis	22863731	8e-14	3.2	C	0.76	1693
	17	Women	rs8066985	65964940	rs17779747	66006587	41647	0.393426	KCNJ2	QT interval	19305409	6e-12	-1.02	T	0.35	29444
	17	Women	rs8066985	65964940	rs7219669	66033456	68516	0.308125	KCNJ2	Cardiac repolarization	22342860	6e-14	-1.7	T	0.38	5615
	5	Men	rs3088050	176659241	rs2545801	176773945	114704	0.243526	UIMC1, FGFR4, NSD1, PRELID1, MXD3, LMAN2, RGS14, SLC34A	Activated partial thromboplastin time	22703881	6e-88	-1.68	C	NR	11851
	5	Men	rs3088050	176659241	rs2545801	176773945	114704	0.243526	F12	Metabolite levels	22286219	9e-11	-0.12	NR	NR	8330
	5	Men	rs3088050	176659241	rs2731672	176775080	115839	0.243526	F12	Circulating vasoactive peptide levels	23381795	1e-67	4.61	T	0.24	6674
	5	Men	rs3088050	176659241	rs2731672	176775080	115839	0.243526	F12	Circulating vasoactive peptide levels	23381795	6e-24	0.02	T	0.24	6674
	5	Men	rs3088050	176659241	rs2731672	176775080	115839	0.243526	PFN3, F12, GRK6	Metabolite levels	22916037	3e-14	NR	NR	0.27	6608
	5	Men	rs3088050	176659241	rs2731672	176775080	115839	0.243526	F12	Activated partial thromboplastin time	20303064	2e-30	-0.45	A	0.27	1431
	20	Men	rs6088735	33209337	rs6120849	33194048	15289	0.883033	EDEM2	Protein C levels	20802025	7e-37	-0.14	T	0.23	9424
	20	Men	rs6088735	33209337	rs6088765	33262941	53604	0.267698	PROCR,UQCC,CEP250	Ulcerative colitis	23128233	2e-08	1.08	G	0.437	77064
	12	Men	rs7307410	63828845	rs6581612	63820891	7954	0.814049	WIF1	Hippocampal volume	22504421	7e-11	-63.3	C	0.27	11550
	12	Men	rs7307410	63828845	rs17178006	64004566	175721	0.27766	MSRB3	Hippocampal volume	22504421	5e-11	-123.8	G	0.1	11550
	12	Men	rs7307410	63828845	rs12229918	64048325	219480	0.239805	MSRB3	Primary tooth development (time to first tooth eruption)	23704328	7e-14	-0.22	C	NR	11118
	12	Men	rs7307410	63828845	rs12229918	64048325	219480	0.239805	MSRB3	Primary tooth development (number of teeth)	23704328	2e-09	0.15	C	NR	11513
	12	Men	rs7307410	63828845	rs10506525	64069645	240800	0.26763	MSRB3	Primary tooth development (time to first tooth eruption)	20195514	6e-09	0.46	C	0.27	5919
	20	Men	rs6088552	32690152	rs4911414	32193105	497047	0.170537	ASIP	Tanning	23548203	4e-09	-0.07	G	NR	9678
	20	Men	rs6088552	32690152	rs2295888	33186524	496372	0.119849	EDEM2, TRPC4AP, PROCR, MYH7B,	Prothrombin time	22703881	5e-13	-0.02	A	NR	3569
	20	Men	rs6088735	33209337	rs8114671	33252803	43466	0.193899	PROCR	Height	23563607	1e-15	1.17	C	0.56	25899
	2	Men	rs2673140	226868111	rs7578326	226728897	139214	0.610596	IRS1	Type 2 diabetes	20581827	5e-20	1.11	A	NR	141454
	2	Men	rs2673140	226868111	rs2943634	226776324	91787	0.758186	IRS1	Fasting insulin-related traits (interaction with BMI)	22581228	2e-14	NR	NR	NR	85573
	2	Men	rs2673140	226868111	rs2943641	226801989	66122	0.873428	LOC64673, IRS1	Type 2 diabetes and other traits	19734900	9e-12	1.19	C	0.63	14051
	2	Men	rs2673140	226868111	rs2972146	226808942	59169	0.906573	IRS1	HDL cholesterol	24097068	2e-17	0.03	G	0.37	188577
	2	Men	rs2673140	226868111	rs2972146	226808942	59169	0.906573	IRS1	Triglycerides	24097068	3e-15	-0.03	G	0.37	188577
	2	Men	rs2673140	226868111	rs2972146	226808942	59169	0.906573	IRS1	HDL cholesterol	20686565	2e-09	0.46	C	0.37	99900
	2	Men	rs2673140	226868111	rs2972146	226808942	59169	0.906573	IRS1	Triglycerides	20686565	2e-08	-1.89	C	0.37	96598
	2	Men	rs2673140	226868111	rs2943650	226814165	53946	0.873428	IRS1	Adiposity	21706003	4e-11	-0.03	T	0.64	76202
	2	Men	rs2673140	226868111	rs925735	226887874	19763	1	IRS1	Adiponectin levels	22479202	2e-08	-0.02	G	0.64	35355
	9	Men	rs10881574	136345043	rs11789898	135915484	429559	0.126993	BRD3	Platelet counts	22139419	2e-10	3.01	T	NR	67504
	9	Men	rs10881574	136345043	rs11789898	135915484	429559	0.126993	BRD3	PLT	22139419	2.39e-10	3.014	T	NR	57391
