# Supplementary material for: The Influence of Age and Sex on Genetic Associations with Adult Body Size and Shape: A Large-Scale Genome-Wide Interaction Study
Source: PLoS Genet. 2015 Oct 1;11(10):e1005378. doi: 10.1371/journal.pgen.1005378 (PMC4591371; doi:10.1371/journal.pgen.1005378)
Supplement: S15 Table — (XLSX) [file pgen.1005378.s031.xlsx]

## Sheet: Table S15 -EGG_BW2_BMIhits
	SNPa,b	Chr	Pos	Nearest Gene	Allelesc	Per allele change Birthweight
					Effect/Other	b	se	p
	rs9936385	16	52376670	FTO	C/T	0.0054	0.0086	0.53
	rs2867125	2	612827	TMEM18	C/T	-0.0073	0.011	0.5
	rs12955983	18	56023969	MC4R	G/A	-0.0054	0.0095	0.57
	rs6737082	2	24991544	ADCY3	C/A	0.0014	0.0083	0.87
	rs2821248	1	72348148	NEGR1	A/G	0.0044	0.011	0.69
	rs1514174	1	74765651	TNNI3K	C/T	-0.0012	0.0083	0.88
	rs591120	1	176169376	SEC16B	C/G	0.011	0.0083	0.17
	rs11908421	20	53813074	CBLN4	T/C	-0.0087	0.01	0.39
	rs4947644	7	50586370	DDC	T/C	0.0033	0.0082	0.69
	rs10840060	11	8456621	STK33	C/A	-0.0002	0.0082	0.98
	rs1459180	8	77144822	Intergeneic	G/T	-0.0034	0.0085	0.69
	rs17747324	10	114742493	TCF7L2	T/C	-0.0005	0.01	0.96
	rs3127574	6	160711360	SLC22A3	C/G	0.0048	0.0081	0.56
	rs3769885	2	165300636	COBLL1	A/G	-0.0027	0.0082	0.74
	rs4420638	19	50114786	APOC1	A/G	0.003	0.014	0.83
	aSummary data from a genome-wide meta-analyses of birth weight has been contributed by EGG Consortium and has been downloaded from www.egg-consortium. The file includes P-values and direction of effect at over 2 million directly genotyped or imputed single nucleotide polymorphisms (SNPs) from the HapMap project (release 27). To minimise the possibility of identification of individuals from these …
	b Loci are ordered by largest to smallest effect in adults <=50 yrs.
	cEffect allele is according to the BMI increasing allele in all men and women.
