# Supplementary material for: The Influence of Age and Sex on Genetic Associations with Adult Body Size and Shape: A Large-Scale Genome-Wide Interaction Study
Source: PLoS Genet. 2015 Oct 1;11(10):e1005378. doi: 10.1371/journal.pgen.1005378 (PMC4591371; doi:10.1371/journal.pgen.1005378)
Supplement: S17 Table — (XLSX) [file pgen.1005378.s033.xlsx]

## Sheet: Table S17 with 16-25y
	SNPa	Nearest gene	Chr.	Pos	Allelesb Effect/Other	Frequency effect allele (%)		Per allele change Ages 16-25 yrsc				Per allele change Age ≤50yrs				Per allele change Age >50yrs					For difference* between Young Adults and Adults £50 yrs	For difference* between Young Adults and Adults >50 yrs
								b	se	p	n	b	se	p	n	b	se	p	n		P-value	P-value
	Loci with stronger effect in adults ≤50 years of age
	rs9936385	FTO	16	52376670	C/T	0.3938		0.0809	0.0089	1.01e-19	28250.2	0.093	0.005	4.45684e-95	115354	0.0731893	0.00348862	1.01041e-97	197478		0.209486	0.381414
	rs2867125	TMEM18	2	612827	C/T	0.827		0.0919	0.011	6.68e-17	28954	0.086	0.006	6.08654e-49	112934	0.051234	0.00447412	2.31897e-30	195579		0.618428	0.0002669
	rs12955983	MC4R	18	56023969	G/A	0.2777		0.0841	0.0097	4.06e-18	28252.3	0.068	0.005	1.72192e-41	114448	0.0384126	0.00385226	2.03226e-23	196590		0.119307	4.15e-06
	rs6737082	ADCY3	2	24991544	C/A	0.4663		0.0443	0.0086	2.56e-07	28253.7	0.046	0.005	6.29309e-20	92190.9	0.0218067	0.0037384	5.43861e-09	162112		0.856267	0.0133701
	rs2821248	NEGR1	1	72348148	A/G	0.8263		0.0266	0.0114	0.01979	28165.9	0.042	0.006	8.36356e-12	106067	0.0171174	0.00458732	0.000190374	188322		0.206581	0.418079
	rs1514174	TNNI3K	1	74765651	C/T	0.434		0.0546	0.0085	1.49e-10	28250.3	0.039	0.005	3.03956e-15	92120.1	0.0117607	0.0037384	0.00165567	161764		0.0934909	1.81e-06
	rs591120	SEC16B	1	176169376	C/G	0.1971		0.0483	0.0085	1.3e-08	28950.3	0.033	0.004	4.8552e-14	115337	0.0143006	0.00341076	2.75554e-05	197480		0.883357	7.31e-05
	rs11908421	CBLN4	20	53813074	T/C	0.8052		0.0313	0.0107	0.003545	28162.8	0.033	0.006	8.69845e-08	92575.2	0.007265	0.0047281	0.124401	162284		0.0864746	0.0303789
	rs4947644	DDC	7	50586370	T/C	0.5121		0.006	0.0085	0.4795	28250.3	0.03	0.005	7.71585e-10	91980	0.00888296	0.0037384	0.0174948	158555		0.0098684	0.736768
	rs10840060	STK33	11	8456621	C/A	0.5034		0.0163	0.0085	0.05371	28253	0.029	0.004	3.81558e-11	110697	0.0106368	0.00345012	0.00204907	187808		0.154743	0.540013
	rs1459180	Intergeneic	8	77144822	G/T	0.5806		0.0262	0.0095	0.005874	24197.9	0.027	0.005	3.05557e-09	112913	0.00858727	0.00355807	0.0158018	190729		0.937244	0.0801852
	Loci with stronger effect in adults >50 years of age;
	rs17747324	TCF7L2	10	114742493	T/C	0.7657		0.0282	0.0105	0.007315	28209.3	0.004	0.006	0.479404	111572	0.0305811	0.0041802	2.5603e-13	193772		0.0340192	0.794566
	rs3127574	SLC22A3	6	160711360	C/G	0.5075		0.0185	0.0085	0.02871	28351.1	0.001	0.004	0.785105	113057	0.0188816	0.00337688	2.25206e-08	195472		0.049903	0.953899
	rs3769885	COBLL1	2	165300636	A/G	0.4838		0.0123	0.0086	0.1513	28354	-0.001	0.005	0.911453	107702	0.0200789	0.00341076	3.93414e-09	192513		0.156464	0.378471
	rs4420638	APOC1	19	50114786	A/G	0.8186		-0.0003	0.0191	0.9865	18832.1	-0.007	0.008	0.363428	83196.4	0.0402937	0.00590541	8.90418e-12	152014		0.734468	0.0366259
	*Beta difference was calculated using z-Statistic including correction for correlated data using spearman rho (ρ): (Beta_A -Beta_B) / SQRT [(SE_A)^2 + (SE_B)^2]-2*(ρ)*SE_A*SE_B, where Beta_A and SE_A are from the Young adult sample (ages 16-25 yrs) and Beta_B and SE_B are from the adult sample (either ages <=50 yrs or >50 yrs).
	a Loci are ordered by largest to smallest effect on BMI in adults ≤50 yrs.
	b Effect allele is according to the BMI increasing allele according to the associated age-group (see Table 1).
	cGraff, M, JS Ngwa, T Workalemahu, G Homuth, S Schipf, A Teumer, et al., Genome-wide analysis of BMI in adolescents and young adults reveals additional insight into the effects of genetic loci over the life course. Hum Mol Genet, 2013. 22(17): p. 3597-607.
