# Supplementary material for: The Influence of Age and Sex on Genetic Associations with Adult Body Size and Shape: A Large-Scale Genome-Wide Interaction Study
Source: PLoS Genet. 2015 Oct 1;11(10):e1005378. doi: 10.1371/journal.pgen.1005378 (PMC4591371; doi:10.1371/journal.pgen.1005378)
Supplement: S18 Table — (XLSX) [file pgen.1005378.s034.xlsx]

## Sheet: Table S18 - Long. weight change
	SNPa	Novel Locus	Nearest Gene	Chr	Pos	Allelesb Effect/Other	Frequency effect allele (%)	ß	SE	p-value	HetISq	HetPVal	N	Direction of effect for BMI across age: from ≤50 years to >50 years [consistency of ß (column I)]
	Loci with stronger effect in adults ≤50 years of age
	rs9936385		FTO	16	52376670	C/T	0.3893	-0.0063	0.0026	0.0154	51.3	0.05542	39041	decreasing [yes]
	rs2867125		TMEM18	2	612827	C/T	0.8309	0.002	0.0033	0.5437	74.7	0.0005999	39041	decreasing [no]
	rs12955983		MC4R	18	56023969	G/A	0.2822	0.0001	0.0028	0.9981	0	0.5678	39041	decreasing [no]
	rs6737082		ADCY3	2	24991544	C/A	0.4687	0.0063	0.0025	0.01214	39.9	0.1253	39041	decreasing [no]
	rs2821248		NEGR1	1	72348148	A/G	0.8175	-0.0016	0.0032	0.6219	0	0.5768	39041	decreasing [yes]
	rs1514174		TNNI3K	1	74765651	C/T	0.4468	-0.0012	0.0025	0.6347	0	0.524	39041	decreasing [yes]
	rs591120		SEC16B	1	176169376	C/G	0.44	-0.0004	0.0025	0.8787	65.8	0.00753	39041	decreasing [yes]
	rs11908421	yes	CBLN4	20	53813074	T/C	0.8	-0.0034	0.0031	0.2641	0	0.5953	39041	decreasing [yes]
	rs4947644	yes	DDC	7	50586370	T/C	0.5016	-0.002	0.0025	0.422	0	0.7928	39041	decreasing [yes]
	rs10840060		STK33	11	8456621	C/A	0.5079	-0.006	0.0025	0.01435	0	0.6146	39041	decreasing [yes]
	rs1459180		Intergeneic	8	77144822	G/T	0.5801	0.0013	0.0025	0.6027	0	0.9822	39036	decreasing [no]
	Loci with stronger effect in adults >50 years of age;
	rs17747324		TCF7L2	10	114742493	T/C	0.7693	0.0078	0.003	0.009722	0	0.6617	39041	increasing [yes]
	rs3127574	yes	SLC22A3	6	160711360	C/G	0.51	0.0049	0.0024	0.04466	17.3	0.2981	39041	increasing [yes]
	rs3769885	yes	COBLL1	2	165300636	A/G	0.49	0.0046	0.0024	0.05744	0	0.6375	39039	increasing [yes]
	rs4420638		APOC1	19	50114786	A/G	0.8195	0.0099	0.0041	0.01512	12.4	0.3357	34672	increasing [yes]
	a Loci are ordered by largest to smallest effect on BMI in adults ≤50 yrs.
	b Effect allele is according to the BMI increasing allele according to the associated age-group (see Table 1).
