# Supplementary material for: The Influence of Age and Sex on Genetic Associations with Adult Body Size and Shape: A Large-Scale Genome-Wide Interaction Study
Source: PLoS Genet. 2015 Oct 1;11(10):e1005378. doi: 10.1371/journal.pgen.1005378 (PMC4591371; doi:10.1371/journal.pgen.1005378)
Supplement: S19 Table — Presented are SNPs with significant sex-differences in eQTL effects, selected according to FDR(P-Sexdiff) < 5%, with and without initial filtering on overall expression effects (FDR(P-Overall) < 20%). (XLSX) [file pgen.1005378.s035.xlsx]

## Sheet: Table S19 Human_eQTL
	Gene Symbol	GeneID	SNP	chr	pos	Filtering on overall association	effect allele	other alelle	β M	seM	β W	SE W	t-stat	P expression overall	P expression sex-diff	FDR expression sex-diff	P WHR sex-diff	P WHR age-diff
	ACSS2	4670544	rs6088552	20	33226491	yes	G	A	0.029	0.0263	0.1828	0.0331	-3.6364	1.785e-05	0.00027645	0.034	7.21e-06	0.74156
	MYH7B	4010132	rs6088735	20	33745676	no	C	T	0.0811	0.0263	-0.1073	0.0331	4.4544	-	8.4145e-06	0.0213	0.00039787	0.62814
