# Supplementary material for: The Influence of Age and Sex on Genetic Associations with Adult Body Size and Shape: A Large-Scale Genome-Wide Interaction Study
Source: PLoS Genet. 2015 Oct 1;11(10):e1005378. doi: 10.1371/journal.pgen.1005378 (PMC4591371; doi:10.1371/journal.pgen.1005378)
Supplement: S20 Table — (XLSX) [file pgen.1005378.s036.xlsx]

## Sheet: Table S20-DEPICT BMI Tissues
				Poverall<1E-3 approach				Poverall<1E-2 approach				GT50 approach				LE50 approach
	Name	MeSH first level term	MeSH second level term	P	FDR	Genes from asscociated loci (Z score > 0)		P	FDR	Genes from asscociated loci (Z score > 0)		P	FDR	Genes from asscociated loci (Z score > 0)		P	FDR	Genes from asscociated loci (Z score > 0)
	Subcutaneous Fat Abdominal	Tissues	Connective Tissue	0.00225919	0.0375	ENSG00000227591 (5.35), ACACB (4.54), CCDC178 (4.5), GPAM (4.02), ANO3 (3.57)		0.0890019	0.897222	LHCGR (7.05), KCNIP2 (6.16), TMEM132C (4.31), C3orf55 (4.14), DARC (3.01)		0.0233579	0.285294	CCDC178 (4.5), TMEM132C (4.31), HSPG2 (2.79), MMD (2.73), ACO1 (2.73)		0.412753	1	LHCGR (7.05), KCNIP2 (6.16), C3orf55 (4.14), GPAM (4.02), PEMT (3.61)
	Adipose Tissue	Tissues	Connective Tissue	0.00246126	0.04	ENSG00000227591 (4.4), ACACB (4.03), GPAM (3.91), CCDC178 (3.78), ADRA2A (3.19)		0.136913	1	LHCGR (5.16), KCNIP2 (4.74), TMEM132C (3.67), C3orf55 (3.46), DARC (3.03)		0.0261146	0.264286	CCDC178 (3.78), TMEM132C (3.67), MMD (2.43), ACO1 (2.39), HSPG2 (2.33)		0.5613	1	LHCGR (5.16), KCNIP2 (4.74), GPAM (3.91), C3orf55 (3.46), DARC (3.03)
	Abdominal Fat	Tissues	Connective Tissue	0.00225919	0.05	ENSG00000227591 (5.35), ACACB (4.54), CCDC178 (4.5), GPAM (4.02), ANO3 (3.57)		0.0890019	0.85	LHCGR (7.05), KCNIP2 (6.16), TMEM132C (4.31), C3orf55 (4.14), DARC (3.01)		0.0233579	0.269444	CCDC178 (4.5), TMEM132C (4.31), HSPG2 (2.79), MMD (2.73), ACO1 (2.73)		0.412753	1	LHCGR (7.05), KCNIP2 (6.16), C3orf55 (4.14), GPAM (4.02), PEMT (3.61)
