# Supplementary material for: The Influence of Age and Sex on Genetic Associations with Adult Body Size and Shape: A Large-Scale Genome-Wide Interaction Study
Source: PLoS Genet. 2015 Oct 1;11(10):e1005378. doi: 10.1371/journal.pgen.1005378 (PMC4591371; doi:10.1371/journal.pgen.1005378)
Supplement: S22 Table — Functions that remain significant after B-H (p<0.05) correction are marked in bold. (XLSX) [file pgen.1005378.s038.xlsx]

## Sheet: Table S22 - IPA_BMI_LE50_Fun
	Category	Diseases or Functions Annotation	p-Value	B-H P-Value	Molecules	# Molecules
	Cancer	melanoma	4.1e-13	6.5e-10	ACTN2, ADAMTSL3, ADARB1, ALPK1, ANAPC4, ANKRD26, ANKS1B, ARHGAP15, ATP8B3, BAZ2B, BBX, BTBD9, BZW2, C10orf76, C12orf42, C15orf53, C16orf62, C3orf20, C4orf22, C6orf10, C6orf58, CACNA1I, CADM1, CADM2, CADPS, CCDC62, CCDC88C, CCSER1, CDCA2, CDH13, CELF5, CEP70, CHST9, CLDN18, CLSTN2, CNTN5, CNTNAP2, COL27A1, CPNE4, CRTAC1, CRTC1, CSMD1, CTNNA1, CTNNA3, CUL3, CYFIP1, DCC, DCLK1, DDC, DNAJC27, EBF1, E…	180
	Cancer	Cancer	4.17e-13	6.5e-10	ACTN2, ADAMTSL3, ADARB1, ADCY3, AGER, AGR3, ALG12, ALPK1, ANAPC4, ANKRD26, ANKS1B, AP1M1, ARHGAP15, ARL15, ARRDC3, ASPSCR1, ATP8B3, AXIN1, B4GALNT1, BAZ2B, BBS9, BBX, BMP3, BRD1, BTBD9, BZW2, C10orf76, C12orf42, C15orf53, C16orf62, C3orf20, C4orf22, C6orf10, C6orf58, CACNA1I, CADM1, CADM2, CADPS, CCDC62, CCDC88C, CCK, CCSER1, CD68, CDCA2, CDH13, CELF5, CEP70, CHST9, CIB3, CLDN18, CLSTN2, CNTN5, C…	245
	Cancer	epithelial neoplasia	1.91e-08	1.99e-05	ACTN2, ADAMTSL3, ADCY3, AGER, AGR3, ALG12, ALPK1, ANAPC4, ANKRD26, ANKS1B, ARHGAP15, ARL15, ARRDC3, ASPSCR1, ATP8B3, AXIN1, B4GALNT1, BAZ2B, BBS9, BRD1, BZW2, C12orf42, C3orf20, C4orf22, CADM1, CADM2, CADPS, CCDC62, CCK, CCSER1, CD68, CDCA2, CDH13, CEP70, CHST9, CIB3, CNTN5, CNTNAP2, COL27A1, CRTAC1, CRTC1, CSMD1, CTNNA1, CTNNA3, CUL3, DARC, DCC, DCLK1, EBF1, EHBP1, EPHB2, ERC2, ESYT3, FAM189A2, …	177
	Cancer	carcinoma	6.84e-08	4.04e-05	ACTN2, ADAMTSL3, ADCY3, AGR3, ALG12, ALPK1, ANAPC4, ANKRD26, ANKS1B, ARHGAP15, ARL15, ARRDC3, ASPSCR1, ATP8B3, AXIN1, B4GALNT1, BAZ2B, BBS9, BRD1, BZW2, C12orf42, C3orf20, C4orf22, CADM1, CADM2, CADPS, CCDC62, CCSER1, CD68, CDCA2, CDH13, CEP70, CHST9, CIB3, CNTN5, CNTNAP2, COL27A1, CRTAC1, CRTC1, CSMD1, CTNNA1, CTNNA3, CUL3, DARC, DCC, DCLK1, EBF1, EHBP1, EPHB2, ERC2, ESYT3, FAM189A2, FAM19A5, FA…	171
	Cancer	solid tumor	7.34e-08	4.04e-05	ACTN2, ADAMTSL3, ADCY3, AGR3, ALG12, ALPK1, ANAPC4, ANKRD26, ANKS1B, ARHGAP15, ARL15, ARRDC3, ASPSCR1, ATP8B3, AXIN1, B4GALNT1, BAZ2B, BBS9, BRD1, BZW2, C12orf42, C3orf20, C4orf22, CADM1, CADM2, CADPS, CCDC62, CCSER1, CD68, CDCA2, CDH13, CEP70, CHST9, CIB3, CNTN5, CNTNAP2, COL27A1, CRTAC1, CRTC1, CSMD1, CTNNA1, CTNNA3, CUL3, DARC, DCC, DCLK1, EBF1, EHBP1, EPHB2, ERC2, ESYT3, FAM189A2, FAM19A5, FA…	172
	Cancer	adenocarcinoma in endometrium	9.33e-08	4.04e-05	ALPK1, ANKS1B, ARHGAP15, ARL15, ARRDC3, BAZ2B, BBS9, BRD1, BZW2, C12orf42, C4orf22, CADPS, CD68, CEP70, CNTN5, CNTNAP2, CRTAC1, CSMD1, CTNNA1, CTNNA3, DCC, DCLK1, EHBP1, FAM189A2, FAM65B, FIGNL1, FSTL5, GLP2R, GRIK1, GRIN3A, GRM7, GRM8, GSX2, HIPK3, HMBOX1, KCNH5, KDM1B, KDM4A, LDB2, LINGO2, LOXHD1, MANBA, MASTL, MCC, MGAM, MLLT3, MPPED1, N4BP2L2, NEGR1, NOTCH4, NT5C3A, PCGF5, PCSK2, PDE1A, PDE1C…	82
	Organismal Injury and Abnormalities, Reproductive System Disease	adenocarcinoma in endometrium	9.33e-08	4.04e-05	ALPK1, ANKS1B, ARHGAP15, ARL15, ARRDC3, BAZ2B, BBS9, BRD1, BZW2, C12orf42, C4orf22, CADPS, CD68, CEP70, CNTN5, CNTNAP2, CRTAC1, CSMD1, CTNNA1, CTNNA3, DCC, DCLK1, EHBP1, FAM189A2, FAM65B, FIGNL1, FSTL5, GLP2R, GRIK1, GRIN3A, GRM7, GRM8, GSX2, HIPK3, HMBOX1, KCNH5, KDM1B, KDM4A, LDB2, LINGO2, LOXHD1, MANBA, MASTL, MCC, MGAM, MLLT3, MPPED1, N4BP2L2, NEGR1, NOTCH4, NT5C3A, PCGF5, PCSK2, PDE1A, PDE1C…	82
	Cancer, Organismal Injury and Abnormalities, Reproductive System Disease	endometrial carcinoma	9.63e-08	4.04e-05	ALPK1, ANKS1B, ARHGAP15, ARL15, ARRDC3, BAZ2B, BBS9, BRD1, BZW2, C12orf42, C4orf22, CADPS, CD68, CDH13, CEP70, CNTN5, CNTNAP2, CRTAC1, CSMD1, CTNNA1, CTNNA3, DCC, DCLK1, EHBP1, FAM189A2, FAM65B, FIGNL1, FSTL5, GLP2R, GRIK1, GRIN3A, GRM7, GRM8, GSX2, HIPK3, HMBOX1, KCNH5, KDM1B, KDM4A, LDB2, LINGO2, LOXHD1, MANBA, MASTL, MCC, MGAM, MLLT3, MPPED1, N4BP2L2, NEGR1, NOTCH4, NT5C3A, PCGF5, PCSK2, PDE1A…	83
	Hereditary Disorder, Neurological Disease, Psychological Disorders	Schizophrenia	1.04e-07	4.04e-05	BRD1, CACNA1I, CCK, CNTNAP2, EBF1, GABRB2, GPR37, GRID1, GRIK1, GRIN3A, GRM7, GRM8, GSK3B, HIPK3, HMBS, INTS6, NELL1, NOTCH4, PDE5A, PEMT, PLA2G4C, PPP1R9B, PRKCB, SLC35F3, SMARCA2, SND1, SREBF1, SYN3	28
	Cancer	endometrioid carcinoma	1.21e-07	4.18e-05	ALPK1, ANKS1B, ARHGAP15, ARL15, ARRDC3, BAZ2B, BBS9, BRD1, BZW2, C12orf42, C4orf22, CADPS, CD68, CEP70, CNTN5, CNTNAP2, CRTAC1, CSMD1, CTNNA1, CTNNA3, DCC, DCLK1, EHBP1, FAM189A2, FAM65B, FIGNL1, FSTL5, GLP2R, GRIK1, GRIN3A, GRM7, GRM8, GSX2, HIPK3, HMBOX1, KCNH5, KDM1B, KDM4A, LDB2, LINGO2, LOXHD1, MANBA, MASTL, MCC, MGAM, MLLT3, MPPED1, N4BP2L2, NEGR1, NOTCH4, NT5C3A, PCGF5, PCSK2, PDE1A, PDE1C…	82
	Cancer, Organismal Injury and Abnormalities, Reproductive System Disease	female genital tract cancer	6.65e-07	0.000207	ADAMTSL3, AGR3, ALPK1, ANKS1B, ARHGAP15, ARL15, ARRDC3, BAZ2B, BBS9, BRD1, BZW2, C12orf42, C3orf20, C4orf22, CADPS, CD68, CDH13, CEP70, CNTN5, CNTNAP2, CRTAC1, CSMD1, CTNNA1, CTNNA3, DCC, DCLK1, EHBP1, EPHB2, EYA2, FAM189A2, FAM65B, FIGNL1, FSTL5, GLP2R, GRIK1, GRIN3A, GRM7, GRM8, GSK3B, GSX2, HIPK3, HMBOX1, KCNH5, KDM1B, KDM4A, LDB2, LINGO2, LOXHD1, MANBA, MASTL, MCC, MGAM, MLLT3, MPPED1, N4BP2L…	94
	Cancer	adenocarcinoma	7.31e-07	0.000207	ACTN2, ADAMTSL3, AGR3, ALG12, ALPK1, ANAPC4, ANKRD26, ANKS1B, ARHGAP15, ARL15, ARRDC3, ASPSCR1, ATP8B3, AXIN1, B4GALNT1, BAZ2B, BBS9, BRD1, BZW2, C12orf42, C4orf22, CADM1, CADM2, CADPS, CCDC62, CCSER1, CD68, CDCA2, CEP70, CHST9, CIB3, CNTN5, CNTNAP2, COL27A1, CRTAC1, CRTC1, CSMD1, CTNNA1, CTNNA3, DARC, DCC, DCLK1, EBF1, EHBP1, EPHB2, ERC2, FAM189A2, FAM65B, FBXL17, FGF14, FHIT, FIGNL1, FSTL5, GLP…	145
	Cancer	endometrial cancer	1.77e-06	0.000461	ALPK1, ANKS1B, ARHGAP15, ARL15, ARRDC3, BAZ2B, BBS9, BRD1, BZW2, C12orf42, C4orf22, CADPS, CD68, CDH13, CEP70, CNTN5, CNTNAP2, CRTAC1, CSMD1, CTNNA1, CTNNA3, DCC, DCLK1, EHBP1, EPHB2, FAM189A2, FAM65B, FIGNL1, FSTL5, GLP2R, GRIK1, GRIN3A, GRM7, GRM8, GSX2, HIPK3, HMBOX1, KCNH5, KDM1B, KDM4A, LDB2, LINGO2, LOXHD1, MANBA, MASTL, MCC, MGAM, MLLT3, MPPED1, N4BP2L2, NEGR1, NOTCH4, NT5C3A, PCGF5, PCSK2…	84
	Organismal Injury and Abnormalities, Reproductive System Disease	endometrial cancer	1.77e-06	0.000461	ALPK1, ANKS1B, ARHGAP15, ARL15, ARRDC3, BAZ2B, BBS9, BRD1, BZW2, C12orf42, C4orf22, CADPS, CD68, CDH13, CEP70, CNTN5, CNTNAP2, CRTAC1, CSMD1, CTNNA1, CTNNA3, DCC, DCLK1, EHBP1, EPHB2, FAM189A2, FAM65B, FIGNL1, FSTL5, GLP2R, GRIK1, GRIN3A, GRM7, GRM8, GSX2, HIPK3, HMBOX1, KCNH5, KDM1B, KDM4A, LDB2, LINGO2, LOXHD1, MANBA, MASTL, MCC, MGAM, MLLT3, MPPED1, N4BP2L2, NEGR1, NOTCH4, NT5C3A, PCGF5, PCSK2…	84
	Cancer	uterine tumor	2.05e-06	0.000492	ADARB1, ALPK1, ANKS1B, ARHGAP15, ARL15, ARRDC3, BAZ2B, BBS9, BRD1, BZW2, C12orf42, C4orf22, CADPS, CALCRL, CD68, CDH13, CEP70, CNTN5, CNTNAP2, CRTAC1, CSMD1, CTNNA1, CTNNA3, DCC, DCLK1, EHBP1, EPHB2, FAM189A2, FAM65B, FIGNL1, FSTL5, GLP2R, GRIK1, GRIN3A, GRM7, GRM8, GSX2, HIPK3, HMBOX1, HNF4G, KCNH5, KDM1B, KDM4A, LDB2, LINGO2, LOXHD1, MANBA, MASTL, MCC, MGAM, MLLT3, MPPED1, N4BP2L2, NEGR1, NOTCH…	91
	Cancer	pelvic cancer	2.89e-06	0.000644	ADAMTSL3, AGER, AGR3, ALPK1, ANKS1B, ARHGAP15, ARL15, ARRDC3, BAZ2B, BBS9, BRD1, BZW2, C12orf42, C3orf20, C4orf22, CADPS, CD68, CDH13, CEP70, CNTN5, CNTNAP2, CRTAC1, CSMD1, CTNNA1, CTNNA3, DCC, DCLK1, EHBP1, EPHB2, EYA2, FAM189A2, FAM65B, FIGNL1, FSTL5, GLP2R, GRIK1, GRIN3A, GRM7, GRM8, GSK3B, GSX2, HIPK3, HMBOX1, KCNH5, KDM1B, KDM4A, LDB2, LINGO2, LOXHD1, MANBA, MASTL, MCC, MGAM, MLLT3, MPPED1, …	100
	Cancer, Organismal Injury and Abnormalities, Reproductive System Disease	uterine cancer	5.04e-06	0.00105	ALPK1, ANKS1B, ARHGAP15, ARL15, ARRDC3, BAZ2B, BBS9, BRD1, BZW2, C12orf42, C4orf22, CADPS, CD68, CDH13, CEP70, CNTN5, CNTNAP2, CRTAC1, CSMD1, CTNNA1, CTNNA3, DCC, DCLK1, EHBP1, EPHB2, FAM189A2, FAM65B, FIGNL1, FSTL5, GLP2R, GRIK1, GRIN3A, GRM7, GRM8, GSX2, HIPK3, HMBOX1, KCNH5, KDM1B, KDM4A, LDB2, LINGO2, LOXHD1, MANBA, MASTL, MCC, MGAM, MLLT3, MPPED1, N4BP2L2, NEGR1, NOTCH4, NT5C3A, PCGF5, PCSK2…	85
	Cancer	abdominal cancer	1.7e-05	0.0033	AGER, AGR3, ALPK1, ANAPC4, ANKRD26, ANKS1B, ARHGAP15, ARL15, ARRDC3, ATP8B3, AXIN1, B4GALNT1, BAZ2B, BBS9, BMP3, BRD1, BZW2, C12orf42, C4orf22, CADM1, CADM2, CADPS, CCDC62, CCK, CCSER1, CD68, CDH13, CEP70, CHST9, CIB3, CLDN18, CNTN5, CNTNAP2, COL27A1, CRTAC1, CRTC1, CSMD1, CTNNA1, CTNNA3, DARC, DCC, DCLK1, DDC, EBF1, EHBP1, EPHB2, ERC2, EYA2, FAM189A2, FAM65B, FBXL17, FGF14, FHIT, FIGNL1, FSTL5, …	145
	Cell Morphology, Cellular Assembly and Organization, Nervous System Development and Function	projection of axons	3.82e-05	0.007	ADCY3, AXIN1, DCC, NR3C2	4
	Cell Cycle	arrest in interphase of squamous cell carcinoma cell lines	0.0001	0.0156	CDCA2, CDH13, FHIT	3
	Cell Morphology, Infectious Disease	budding of Murine leukemia virus	0.0001	0.0156	AP1M1, ARRDC3, WWP2	3
	DNA Replication, Recombination, and Repair; Nucleic Acid Metabolism; Small Molecule Biochemistry	catabolism of cyclic GMP	0.0001	0.0156	PDE1A, PDE1C, PDE5A	3
	Cancer, Dermatological Diseases and Conditions	skin cancer	0.0002	0.0282	AXIN1, C3orf20, C4orf22, CADPS, CLSTN2, CNTN5, CNTNAP2, COL27A1, DCLK1, GABRB2, GLP2R, GRM7, GRM8, GSK3B, KCNH5, LOXHD1, LPHN2, NELL1, NOX4, NR3C2, NTRK3, PDE1A, PDE1C, PRDM9, PRKCB, PTPRD, SNX19, TSHZ2, XPA	29
	Cellular Assembly and Organization, Cell-To-Cell Signaling and Interaction, Tissue Development	compaction of colon cancer cell lines	0.000208	0.0282	CTNNA1, CTNNA3	2
	Hereditary Disorder, Hematological Disease	thrombocytopenia-2	0.000208	0.0282	ANKRD26, MASTL	2
	Cancer, Dermatological Diseases and Conditions	malignant cutaneous melanoma cancer	0.000292	0.0379	C3orf20, C4orf22, CADPS, CLSTN2, CNTN5, CNTNAP2, DCLK1, GABRB2, GLP2R, GRM7, GRM8, KCNH5, LOXHD1, LPHN2, NELL1, NOX4, NR3C2, NTRK3, PDE1A, PDE1C, PRDM9, PTPRD, SNX19, TSHZ2	24
	Cardiovascular Disease	coronary artery disease	0.000372	0.0464	C6orf10, CDH13, CNTN5, CSMD1, CTNNA3, GABRB2, MGAM, MSRA, NPR1, PDE5A, SGCD, SMG6, UBE2Q2P1	13
