# Supplementary material for: The Influence of Age and Sex on Genetic Associations with Adult Body Size and Shape: A Large-Scale Genome-Wide Interaction Study
Source: PLoS Genet. 2015 Oct 1;11(10):e1005378. doi: 10.1371/journal.pgen.1005378 (PMC4591371; doi:10.1371/journal.pgen.1005378)
Supplement: S23 Table — Functions that remain significant after B-H correction are marked in bold. (XLSX) [file pgen.1005378.s039.xlsx]

## Sheet: Table S23_IPA_BMI_GT50_Fun
	Category(ies)	Diseases or Functions Annotation	p-Value	B-H p-Value	Molecules	# Molecules
	Cancer	melanoma	1.09e-09	2.97e-06	ADAM18, ADAM2, ADCY5, AGBL4, ANK2, ARAP1, ARHGEF26, ARHGEF28, ASTN2, ATP6V1C2, ATXN1, BBS2, BTNL2, C1orf185, C6orf10, CADM2, CADPS, CCDC178, CCDC92, CCSER1, CDH13, CDHR3, CEP164, CNTNAP2, COBLL1, COL23A1, COL25A1, COL4A2, CRTC1, CYP2R1, DAGLA, DCC, DDAH1, DHX36, DLC1, DNAH10, DPF3, DPP10, DPYD, ELAVL4, EYA4, EYS, FAM13A, FAM184A, FARSB, FASN, FIBCD1, FREM1, FRMD3, GAB1, GABRB3, GRAMD1A, GRB14, GR…	117
	Cell Morphology, Cellular Assembly and Organization, Cellular Function and Maintenance	formation of cellular protrusions	2.05e-08	2.8e-05	ARAP1, ARHGEF28, ATXN1, BBS2, CDH13, CEP164, CNTNAP2, CYR61, DCC, GAB1, GRM4, MAP2K1, MFN2, MRAS, NEO1, NLGN1, NRG1, PALLD, PCNT, RAC1, RASGRF1, RIT1, RIT2, RPGRIP1L, RTN4, SRGAP3, WWTR1	27
	Cellular Assembly and Organization, Cellular Function and Maintenance	microtubule dynamics	1.72e-06	0.00156	ARAP1, ARHGEF28, ATXN1, BBS2, CDH13, CEP164, CNTNAP2, CYR61, DCC, GAB1, GRM4, KLC1, MAP2K1, MFN2, MRAS, NEO1, NFIX, NLGN1, NRG1, PALLD, PCNT, RAC1, RASGRF1, RIT1, RIT2, RPGRIP1L, RTN4, SRGAP3, WWTR1	29
	Cellular Assembly and Organization, Cellular Function and Maintenance	organization of cytoskeleton	5.67e-06	0.00386	ARAP1, ARHGEF28, ATXN1, BBS2, CDH13, CEP164, CNTNAP2, CYR61, DCC, DLC1, GAB1, GRM4, KLC1, MAP2K1, MFN2, MRAS, NEO1, NFIX, NLGN1, NRG1, PALLD, PCNT, PVRL2, RAC1, RASGRF1, RIT1, RIT2, RPGRIP1L, RTN4, SRGAP3, WWTR1	31
	Cancer	Cancer	1.39e-05	0.00596	ADAM18, ADAM2, ADCY5, ADK, AGBL4, AK5, AMFR, ANK2, ANKRD10, ARAP1, ARHGEF26, ARHGEF28, ASTN2, ATP6V1C2, ATXN1, BBS2, BCL2L11, BTNL2, C1orf185, C6orf10, C6orf62, CADM2, CADPS, CCDC178, CCDC85A, CCDC92, CCSER1, CDH13, CDHR3, CDK17, CEP164, CNTNAP2, COBLL1, COL23A1, COL25A1, COL4A2, CRTC1, CYP2R1, CYR61, DAGLA, DCC, DCLRE1C, DDAH1, DHX36, DLC1, DNAH10, DPF3, DPP10, DPYD, ELAVL4, EYA4, EYS, FAM13A, F…	149
	Neurological Disease	progressive motor neuropathy	1.45e-05	0.00596	AK5, ATXN1, BTNL2, C6orf10, CYR61, FARSB, FASN, GABRB3, GRIN2B, HLA-DQA2, HLA-DQB2, HLA-DRB3, NRG1, NRXN1, RBFOX1, RTN4, TMEM55A, WWTR1	18
	Cancer	adenocarcinoma	1.53e-05	0.00596	ADAM18, ADCY5, ADK, AK5, ANK2, ANKRD10, ASTN2, ATXN1, BBS2, BTNL2, C6orf62, CADM2, CADPS, CCDC92, CCSER1, CDHR3, CDK17, CEP164, CNTNAP2, COBLL1, CRTC1, CYR61, DCC, DHX36, DLC1, DNAH10, DPF3, DPP10, DPYD, ELAVL4, EYA4, EYS, FAM13A, FAM184A, FASN, FERMT2, FREM1, GAB1, GRB14, GRIN2B, GRM4, HEATR3, KIF6, KLC1, KLHL8, LEPR, LGR4, LRP1B, LRRTM4, MACROD2, MAP2K1, MED13, METTL14, MFN2, MKLN1, NCAM2, NEO1…	95
	Neurological Disease, Hereditary Disorder, Psychological Disorders	Schizophrenia	1.8e-05	0.00613	ATXN1, CNTNAP2, DNAH10, DPYD, ELAVL4, GABRB3, GRIN2B, GRM4, KLC1, NRG1, NRXN1, RBFOX1, RIT2, RTN4, SERPINI1, TCF7L2, TMTC1, ZFHX3	18
	Cancer	malignant cutaneous melanoma cancer	2.5e-05	0.00757	ADAM18, ADCY5, ANK2, ASTN2, BBS2, CADPS, CNTNAP2, FASN, GRIN2B, HEATR3, HSPG2, LRP1B, MAP2K1, NOL4, NRG1, PLEKHA7, RAC1, RBFOX1, SGPP2, XRCC3	20
	Dermatological Diseases and Conditions	malignant cutaneous melanoma cancer	2.5e-05	0.00757	ADAM18, ADCY5, ANK2, ASTN2, BBS2, CADPS, CNTNAP2, FASN, GRIN2B, HEATR3, HSPG2, LRP1B, MAP2K1, NOL4, NRG1, PLEKHA7, RAC1, RBFOX1, SGPP2, XRCC3	20
	Cancer	carcinoma	3.44e-05	0.00876	ADAM18, ADCY5, ADK, AK5, ANK2, ANKRD10, ARAP1, ASTN2, ATXN1, BBS2, BTNL2, C6orf62, CADM2, CADPS, CCDC178, CCDC85A, CCDC92, CCSER1, CDH13, CDHR3, CDK17, CEP164, CNTNAP2, COBLL1, COL4A2, CRTC1, CYR61, DCC, DHX36, DLC1, DNAH10, DPF3, DPP10, DPYD, ELAVL4, EYA4, EYS, FAM13A, FAM184A, FASN, FERMT2, FREM1, GAB1, GABRB3, GRB14, GRIN2B, GRM4, GSAP, HEATR3, HSPG2, KIF6, KLC1, KLHL8, LEPR, LGR4, LRP1B, LRRT…	108
	Cancer, Dermatological Diseases and Conditions	skin cancer	3.53e-05	0.00876	ADAM18, ADCY5, ANK2, ASTN2, BBS2, BCL2L11, CADPS, CNTNAP2, FASN, GRIN2B, HEATR3, HSPG2, LRP1B, MAP2K1, NOL4, NRG1, NRIP1, PLEKHA7, RAC1, RBFOX1, RUNX1, SGPP2, XRCC3	23
	Behavior	social behavior	4.97e-05	0.0109	CNTNAP2, GABRB3, NLGN1, NRXN1, RTN4, SRGAP3	6
	Cancer	epithelial neoplasia	5.2e-05	0.0109	ADAM18, ADCY5, ADK, AK5, ANK2, ANKRD10, ARAP1, ASTN2, ATXN1, BBS2, BTNL2, C6orf62, CADM2, CADPS, CCDC178, CCDC85A, CCDC92, CCSER1, CDH13, CDHR3, CDK17, CEP164, CNTNAP2, COBLL1, COL4A2, CRTC1, CYR61, DCC, DHX36, DLC1, DNAH10, DPF3, DPP10, DPYD, ELAVL4, EYA4, EYS, FAM13A, FAM184A, FASN, FERMT2, FREM1, GAB1, GABRB3, GRB14, GRIN2B, GRM4, GSAP, HEATR3, HSPG2, KIF6, KLC1, KLHL8, LEPR, LGR4, LRP1B, LRRT…	110
	Behavior	learning	5.73e-05	0.0112	ADAM2, ADCY5, ATXN1, CNTNAP2, GABRB3, GRIN2B, GRM4, LEPR, MAP2K1, NLGN1, NRG1, NRXN1, RASGRF1, SRGAP3	14
	Cell-To-Cell Signaling and Interaction, Nervous System Development and Function, Tissue Development	cell-cell adhesion of neurons	8.87e-05	0.0161	NCAM2, NLGN1, NRXN1	3
	Cancer	breast or colorectal cancer	0.000116	0.0198	ADAM18, ADCY5, ADK, ANKRD10, ATXN1, BBS2, BTNL2, CADM2, CCDC85A, CCSER1, CDH13, CDHR3, CDK17, CEP164, CNTNAP2, COBLL1, COL4A2, CRTC1, CYR61, DCC, DHX36, DLC1, DNAH10, DPF3, DPP10, DPYD, EYS, FAM184A, FASN, FERMT2, FREM1, GAB1, GRB14, GRIN2B, HSPG2, KIF6, LEPR, LGR4, LRP1B, MACROD2, MED13, MFN2, MKLN1, NLGN1, NOL4, NRG1, NRIP1, NRXN1, NTM, PALLD, PCNT, PKIA, PLEKHA7, PPP2R5C, PRSS12, PVRL2, RASGRF…	73
	Cell Morphology, Cellular Assembly and Organization, Cellular Function and Maintenance, Cellular Development	formation of plasma membrane projections	0.000123	0.0198	ARHGEF28, ATXN1, CNTNAP2, CYR61, DCC, GRM4, MAP2K1, MFN2, MRAS, NRG1, PALLD, RAC1, RASGRF1, RIT1, RIT2, RTN4	16
	Cell Morphology, Cellular Assembly and Organization, Cellular Function and Maintenance, Nervous System Development and Function, Tissue Development, Cellular Development	morphogenesis of neurites	0.000139	0.0206	ATXN1, CNTNAP2, CYR61, GRM4, MAP2K1, MFN2, NRG1, PALLD, RAC1, RASGRF1, RIT1, RTN4	12
	Cell Morphology, Cellular Assembly and Organization, Cellular Function and Maintenance, Nervous System Development and Function, Tissue Development, Cellular Development	neuritogenesis	0.000144	0.0206	ARHGEF28, ATXN1, CNTNAP2, CYR61, DCC, GRM4, MAP2K1, MFN2, MRAS, NRG1, PALLD, RAC1, RASGRF1, RIT1, RTN4	15
	Endocrine System Disorders, Gastrointestinal Disease, Metabolic Disease	non-insulin-dependent diabetes mellitus	0.000252	0.0301	ADCY5, ANK2, BCL2L11, C6orf10, CDKAL1, CNTNAP2, IGF2BP2, RAMP3, RBFOX1, TCF7L2, ZPBP	11
	Behavior	behavioral flexibility	0.000253	0.0301	CNTNAP2, NLGN1	2
	Tissue Development, Tissue Morphology	expansion of epithelial tissue	0.000253	0.0301	HSPG2, LEPR	2
	Cell Morphology, Cellular Assembly and Organization, Nervous System Development and Function	projection of axons	0.000262	0.0301	DCC, RAC1, RTN4	3
	Cell Morphology, Cellular Assembly and Organization, Cellular Function and Maintenance, Nervous System Development and Function, Tissue Development, Cellular Development, Embryonic Development	dendritic growth/branching	0.000264	0.0301	ATXN1, CNTNAP2, CYR61, MFN2, NRG1, RAC1, RIT1, RTN4	8
	Cell Morphology, Cellular Assembly and Organization, Cellular Function and Maintenance	formation of cilia	0.000312	0.0341	BBS2, CEP164, PCNT, RPGRIP1L, WWTR1	5
	Nervous System Development and Function, Cellular Movement	migration of Schwann cells	0.000397	0.0399	MRAS, NRG1, RAC1	3
	Gastrointestinal Disease, Inflammatory Disease	Crohn's disease	0.000423	0.0399	BTNL2, C6orf10, CDKAL1, DCC, HLA-DQA2, LRP1B, SLC24A4, TCF7L2	8
	Endocrine System Disorders, Gastrointestinal Disease, Metabolic Disease	diabetes mellitus	0.000462	0.0399	ADCY5, ANK2, BCL2L11, BTNL2, C6orf10, CDKAL1, CNTNAP2, DDAH1, FRMD3, GABRB3, GRIN2B, HLA-DQA2, HLA-DQB2, HLA-DRB3, IGF2BP2, LEPR, LRP1B, PDE2A, RAMP3, RBFOX1, TCF7L2, TMTC1, TXN, ZPBP	24
	Gene Expression	induction of RNA	0.000479	0.0399	LEPR, MAP2K1, PDE2A	3
	Behavior	nest building behavior	0.000479	0.0399	CNTNAP2, GABRB3, NRXN1	3
	Cancer, Gastrointestinal Disease	digestive organ tumor	0.000487	0.0399	ADAM18, ADCY5, ANKRD10, ATXN1, BBS2, BTNL2, CADM2, CCDC178, CCSER1, CDH13, CDHR3, CDK17, CEP164, CNTNAP2, COBLL1, COL4A2, CRTC1, CYR61, DCC, DHX36, DLC1, DNAH10, DPF3, DPP10, DPYD, EYS, FAM184A, FASN, FREM1, GAB1, GRB14, GRIN2B, KIF6, LEPR, LGR4, LRP1B, MACROD2, MDGA1, MED13, MFN2, MKLN1, NCR3LG1, NLGN1, NOL4, NRG1, NRIP1, NRXN1, NTM, PALLD, PCNT, PDE2A, PKIA, PLEKHA7, PPP2R5C, PRSS12, RASGRF1, R…	68
	Cell-To-Cell Signaling and Interaction, Tissue Development, Skeletal and Muscular System Development and Function	adhesion of vascular smooth muscle cells	0.000503	0.0399	CYR61, NEO1	2
	Cellular Development, Cellular Growth and Proliferation	expansion of pheochromocytoma cell lines	0.000503	0.0399	RAC1, RASGRF1	2
	Nervous System Development and Function, Cellular Development	neurogenesis of nervous tissue cell lines	0.000503	0.0399	MIR100HG, RMST	2
	Cell Morphology	shape change of neurites	0.000512	0.0399	ATXN1, CNTNAP2, CYR61, DCC, MFN2, NRG1, RAC1, RIT1, RTN4	9
	Carbohydrate Metabolism, Lipid Metabolism, Small Molecule Biochemistry	hydrolysis of phosphatidylinositol 4,5-diphosphate	0.000571	0.0421	DCC, NEO1, TMEM55A	3
	Cell Morphology, Reproductive System Development and Function	morphology of breast cell lines	0.000571	0.0421	GAB1, RAC1, WWTR1	3
	Nervous System Development and Function, Organ Morphology, Organismal Development	abnormal morphology of corpus callosum	0.000599	0.043	CNTNAP2, DCC, NFIX, RPGRIP1L	4
	Tissue Morphology, Lymphoid Tissue Structure and Development	quantity of splenocytes	0.000656	0.0459	BCL2L11, DCLRE1C, RAC1, TWSG1	4
