# Supplementary material for: The Influence of Age and Sex on Genetic Associations with Adult Body Size and Shape: A Large-Scale Genome-Wide Interaction Study
Source: PLoS Genet. 2015 Oct 1;11(10):e1005378. doi: 10.1371/journal.pgen.1005378 (PMC4591371; doi:10.1371/journal.pgen.1005378)
Supplement: S25 Table — Functions that remain significant after B-H correction are marked in bold. (XLSX) [file pgen.1005378.s041.xlsx]

## Sheet: Table S25_IPA_WHR_Women_Fun
	Category	Diseases or Functions Annotation	p-Value	B-H p-Value	Molecules	# Molecules
	Cell Morphology	morphology of cells	1.27e-06	0.00409	ABCA1, ACVR1C, AKT2, ARID5B, BCAR3, BCL2, BMPR1B, CADPS2, CCDC92, CLIP1, CMIP, CNTN2, CSK, CYP17A1, CYP1A2, DNM3, DOCK3, EHD4, EYA2, HSD17B4, IFT122, LIN9, MAPT, MBD4, MYH7, NCOA1, NMU, PCK1, PEMT, PPARG, PRKCE, PRRX2, RAF1, ROBO1, SELE, SH3GL2, SHC1, SYN2, ZNF385A	39
	Cell Morphology	abnormal morphology of cells	6.47e-06	0.0104	ABCA1, AKT2, ARID5B, BCAR3, BCL2, BMPR1B, CADPS2, CLIP1, CMIP, CYP17A1, CYP1A2, DNM3, EHD4, HSD17B4, IFT122, MAPT, MBD4, NCOA1, PCK1, PEMT, PPARG, PRRX2, RAF1, ROBO1, SELE, SH3GL2, SHC1, SYN2, ZNF385A	29
	Cell-To-Cell Signaling and Interaction, Cellular Compromise, Tissue Development, Tumor Morphology	adhesion of cancer cells	2.31e-05	0.0247	AKT2, PRKCE, SELE, SELL	4
	Behavior	fear conditioning	4.05e-05	0.0275	BMPR1B, CRHR1, MAPT	3
	Cardiovascular System Development and Function	development of cardiovascular system	4.82e-05	0.0275	ACVR1, ADAMTS8, BCL2, CSK, EHD4, MAEA, MAP3K3, MEIS1, MIXL1, MYH7, NCOA1, PLXND1, PPARG, PRKCE, PRRX2, RAF1, ROBO1, SELE, SELL, SHC1, SUFU, WARS2	22
	Cardiovascular System Development and Function, Organismal Development	development of blood vessel	5.15e-05	0.0275	ACVR1, ADAMTS8, BCL2, CSK, EHD4, MAP3K3, MEIS1, NCOA1, PLXND1, PPARG, PRKCE, PRRX2, RAF1, ROBO1, SELE, SELL, SHC1, SUFU, WARS2	19
	Behavior	anxiety	6.44e-05	0.0282	BMPR1B, CADPS2, CLOCK, CRHR1, CSK, HSD17B4, MAPT, RAI1	8
	Organismal Development	abnormal morphology of body cavity	7.67e-05	0.0282	ABCA1, AKT2, ARID5B, BCL2, BMPR1B, CADPS2, CRHR1, CYP1A2, EHD4, IFT122, PCK1, PEMT, PLXND1, PPARG, PRKCE, RAF1, ROBO1, RSPO3, SELE, SELL, SHC1, SUFU, WNT6	23
	Cell Morphology, Tissue Morphology	morphology of connective tissue cells	8.6e-05	0.0282	ABCA1, ARID5B, BCL2, BMPR1B, PCK1, PPARG, PRRX2, RAF1	8
	Behavior	conditioning	0.000109	0.0282	BMPR1B, CLOCK, CRHR1, CSK, MAPT, PRKCE, RAI1, RPS6KA5	8
	Lipid Metabolism, Molecular Transport, Small Molecule Biochemistry	quantity of steroid	0.000119	0.0282	ABCA1, AKT2, BCL2, CLOCK, CRHR1, CYP17A1, HSD17B4, NCOA1, NMU, PEMT, PPARG, PRKCE, RAI1	13
	Cardiovascular System Development and Function, Organismal Development	vasculogenesis	0.000126	0.0282	ACVR1, ADAMTS8, BCL2, EHD4, MAP3K3, MEIS1, NCOA1, PLXND1, PPARG, PRKCE, PRRX2, RAF1, ROBO1, SELE, SHC1, SUFU, WARS2	17
	Reproductive System Development and Function	abnormal morphology of reproductive system	0.000149	0.0282	ABCA1, AKT2, ARID5B, BCL2, BMPR1B, CLIP1, EHD4, HSD17B4, NCOA1, PPARG, PRKCE, RAF1, STC2, WNT6	14
	Cellular Movement, Hematological System Development and Function, Immune Cell Trafficking	cell rolling of peripheral blood leukocytes	0.000149	0.0282	SELE, SELL	2
	Cellular Compromise	degeneration of perikaryon	0.000149	0.0282	BCL2, MAPT	2
	Cell Morphology, Reproductive System Development and Function	elongation of gonadal cell lines	0.000149	0.0282	MAPT, RRBP1	2
	Metabolic Disease, Respiratory Disease	pulmonary alveolar proteinosis	0.00015	0.0282	ABCA1, BCL2, PPARG	3
	Cell Death and Survival	apoptosis of connective tissue cells	0.000182	0.0309	AKT2, BCL2, BMPR1B, CRADD, DIABLO, MBD4, PPARG, RAF1, TNFAIP8	9
	Cardiovascular System Development and Function, Organismal Development, Reproductive System Development and Function	vascularization of placenta	0.000183	0.0309	MAP3K3, PPARG, RAF1	3
	Reproductive System Development and Function, Organ Morphology	abnormal morphology of internal genitalia	0.00022	0.0337	ABCA1, AKT2, ARID5B, BCL2, BMPR1B, EHD4, HSD17B4, NCOA1, PRKCE, STC2, WNT6	11
	Cardiovascular System Development and Function	angiogenesis	0.000223	0.0337	ACVR1, ADAMTS8, BCL2, EHD4, MAP3K3, MEIS1, NCOA1, PLXND1, PPARG, PRRX2, RAF1, ROBO1, SELE, SELL, SHC1, SUFU	16
	Cancer	melanoma	0.000235	0.0337	ABCA1, ACBD3, ACTR1A, ACVR1C, ADAMTS8, BBX, BCL2, BMPR1B, BNC2, BRE, C11orf88, C14orf159, C19orf47, C6orf106, CADM2, CADPS2, CAMK1G, CAND2, CCDC92, CLIP1, CNTN2, COBLL1, CSK, CYP17A1, CYP1A2, DAGLB, DDX42, DNAH10, DNM3, DOCK3, DSTYK, EHD4, EYA2, FAM13A, GANAB, GYS2, HHIP, HMGXB4, IFT122, IL18RAP, KANSL1, LIN9, LRIG1, LRPPRC, MAEA, MAPT, MTMR3, MYH7, NCAN, NCOA1, NT5C2, PCK1, PDCL2, PLCB3, PLXND1,…	80
	Reproductive System Development and Function, Organ Morphology	abnormal morphology of genital organ	0.000242	0.0337	ABCA1, AKT2, ARID5B, BCL2, BMPR1B, CLIP1, EHD4, HSD17B4, NCOA1, PRKCE, STC2, WNT6	12
	Cell Morphology, Connective Tissue Development and Function	morphology of fibroblast cell lines	0.000278	0.0358	DOCK3, MAPT, PPARG, PRKCE, RAF1	5
	Cell-To-Cell Signaling and Interaction, Tissue Development, Cardiovascular System Development and Function	adhesion of HCAEC cells	0.000297	0.0358	SELE, SELL	2
	Cell-To-Cell Signaling and Interaction, Cellular Compromise, Tissue Development, Tumor Morphology	adhesion of acute myeloid leukemia blast cells	0.000297	0.0358	SELE, SELL	2
	Cell-To-Cell Signaling and Interaction, Tissue Development, Hematological System Development and Function, Immune Cell Trafficking	adhesion of peripheral blood leukocytes	0.000312	0.0358	PPARG, SELE, SELL	3
	Cellular Assembly and Organization, Cellular Function and Maintenance	bundling of microtubules	0.000312	0.0358	CLIP1, MAPT, RRBP1	3
	Connective Tissue Disorders, Inflammatory Disease, Skeletal and Muscular Disorders	spondylarthritis	0.000348	0.0386	CNTN2, CYP1A2, ROBO1, SCN3A, SCN9A	5
	Cellular Movement, Hematological System Development and Function, Immune Cell Trafficking	cell movement of peripheral blood leukocytes	0.000371	0.0395	PLCB3, PPARG, SELE, SELL	4
	Lipid Metabolism, Small Molecule Biochemistry, Energy Production	oxidation of lipid	0.000382	0.0395	AKT2, BCL2, CYP1A2, HSD17B4, LRPPRC, NT5C2, PPARG	7
	Molecular Transport, Small Molecule Biochemistry, Endocrine System Development and Function	abnormal quantity of hormone	0.000402	0.0396	CADPS2, CRHR1, NCOA1, RAI1	4
	Molecular Transport, Carbohydrate Metabolism	secretion of carbohydrate	0.000424	0.0396	ABCA1, PEMT, PRKCE	3
	Organismal Development, Reproductive System Development and Function, Organ Morphology	abnormal morphology of uterus	0.000431	0.0396	ABCA1, ARID5B, BMPR1B, PRKCE, WNT6	5
	Organismal Development	abnormal morphology of abdomen	0.000432	0.0396	ABCA1, AKT2, ARID5B, BCL2, BMPR1B, CADPS2, CMIP, CRHR1, EHD4, IFT122, PCK1, PEMT, PPARG, PRKCE, RAF1, SELE, SELL, WNT6	18
	Respiratory Disease	dyspnea	0.000457	0.0408	ABCA1, AKT2, CRHR1, CYP1A2, PRRX2, SH3GL2	6
	Cellular Assembly and Organization	density of axons	0.000493	0.0413	ACVR1C, MAPT	2
	Hematological System Development and Function, Cellular Function and Maintenance, Cellular Growth and Proliferation, Hematopoiesis	production of megakaryocytes	0.000493	0.0413	MEIS1, ZNF385A	2
	Cell Death and Survival	apoptosis of fibroblasts	0.000506	0.0413	AKT2, BCL2, CRADD, DIABLO, MBD4, RAF1, TNFAIP8	7
	Psychological Disorders	Mood Disorders	0.000515	0.0413	BCL2, CLOCK, COX5A, DIABLO, DLAT, FKBP5, MAPT, NCAN, PPARG, SCN3A, SCN9A, SYN2	12
	Tissue Morphology, Connective Tissue Development and Function	quantity of white adipose tissue	0.000528	0.0413	AKT2, ARID5B, PCK1, PPARG, RAI1	5
	Lipid Metabolism, Molecular Transport, Small Molecule Biochemistry	quantity of steroid hormone	0.000552	0.0414	CLOCK, CRHR1, NMU, PPARG, PRKCE, RAI1	6
	Cell Morphology, Organismal Development, Organ Morphology, Renal and Urological System Development and Function	effacement of pedicels	0.000558	0.0414	BCL2, CMIP, EHD4	3
	Organismal Survival	neonatal death	0.000567	0.0414	ARID5B, CADPS2, CYP1A2, DNM3, HSD17B4, PLXND1, PRRX2, RAF1, ROBO1, SCN9A, SH3GL2, SOX5	12
	Tissue Development, Organismal Development, Organ Morphology, Embryonic Development, Organ Development, Respiratory System Development and Function	abnormal morphology of lung	0.000623	0.0436	ABCA1, CRHR1, CYP1A2, RAF1, ROBO1, SELE, SELL	7
		abnormal morphology of lung	0.000623	0.0436	ABCA1, CRHR1, CYP1A2, RAF1, ROBO1, SELE, SELL	7
	Behavior	behavior	0.000624	0.0436	ARID5B, BCL2, BMPR1B, CADPS2, CLOCK, CNTN2, CRHR1, CSK, CYP1A2, DNM3, HSD17B4, MAPT, NCOA1, NMU, PRKCE, RAI1, RPS6KA5, SELE, SYN2	19
	Tissue Morphology	morphology of connective tissue	0.000664	0.0451	ABCA1, ARID5B, BCL2, BMPR1B, PCK1, PPARG, PRRX2, RAF1, RAI1, RSPO3, SHC1, ZNF385A	12
	Lipid Metabolism, Small Molecule Biochemistry, Energy Production	oxidation of fatty acid	0.000735	0.0451	AKT2, BCL2, HSD17B4, LRPPRC, NT5C2, PPARG	6
	Organismal Development	abnormal morphology of thoracic cavity	0.000736	0.0451	ABCA1, BCL2, CRHR1, CYP1A2, IFT122, PLXND1, PPARG, RAF1, ROBO1, RSPO3, SELE, SELL, SHC1, SUFU	14
	Cellular Assembly and Organization	association of cellular membrane	0.000736	0.0451	ABCA1, RRBP1	2
	Lipid Metabolism, Molecular Transport, Small Molecule Biochemistry, Carbohydrate Metabolism	secretion of phosphatidylcholine	0.000736	0.0451	ABCA1, PEMT	2
	Cell Morphology	morphology of tumor cell lines	0.00074	0.0451	ACVR1C, BCL2, CSK, EYA2, LIN9, PRKCE, RAF1	7
	Free Radical Scavenging	synthesis of reactive oxygen species	0.000754	0.0451	ABCA1, AKT2, BCL2, CYP1A2, MAPT, PLCB3, PPARG, PRKCE, SELE, SHC1	10
	Organismal Survival	organismal death	0.000759	0.0451	ABCA1, ACVR1, AKT2, ARID5B, BCL2, CADPS2, CRHR1, CSK, CYP17A1, CYP1A2, DNM3, EHD4, HSD17B4, IFT122, IL18R1, LIN9, MAEA, MAP3K3, MYH7, NCOA1, PCK1, PLCB3, PLXND1, PPARG, PRRX2, RAF1, RAI1, ROBO1, RPS6KA5, RSPO3, SCN9A, SELE, SH3GL2, SHC1, SOX5, SUFU, ZNF385A	37
	Organ Morphology	morphology of endocrine gland	0.000805	0.046	ABCA1, AKT2, ARID5B, CADPS2, CRHR1, EHD4, PPARG	7
	Cell-To-Cell Signaling and Interaction	response of macrophage cancer cell lines	0.000807	0.046	CLIP1, CSK, PRKCE	3
	Lipid Metabolism, Small Molecule Biochemistry, Energy Production	oxidation of long chain fatty acid	0.000817	0.046	BCL2, HSD17B4, LRPPRC, NT5C2	4
	Organismal Development, Embryonic Development	dorsal-ventral axis patterning	0.000871	0.0477	BMPR1B, HHIP, IFT122, SUFU	4
	Molecular Transport, Small Molecule Biochemistry, Energy Production, Nucleic Acid Metabolism	concentration of ATP	0.000877	0.0477	AKT2, LRPPRC, MAPT, PLCB3, PPARG	5
	Tissue Development	formation of connective tissue	0.000903	0.0482	PPARG, SELL, SOX5	3
	Cancer	Cancer	0.00092	0.0482	ABCA1, ACBD3, ACTR1A, ACVR1, ACVR1C, ADAMTS8, AKT2, ARID5B, BBX, BCL2, BMPR1B, BNC2, BRE, C11orf88, C14orf159, C19orf47, C6orf106, CADM2, CADPS2, CAMK1G, CAND2, CCDC92, CLIP1, CLOCK, CMIP, CNNM2, CNTN2, COBLL1, COX5A, CRADD, CSK, CYP17A1, CYP1A2, DAGLB, DDX42, DIABLO, DLAT, DNAH10, DNM3, DOCK3, DSTYK, EHD4, EYA2, FAM13A, FKBP5, GANAB, GPSM2, GYS2, HHIP, HMGXB4, HSD17B4, IFT122, IL18R1, IL18RAP, K…	112
	Developmental Disorder	Hypoplasia	0.000942	0.0482	AKT2, ARID5B, BCL2, CRHR1, DSTYK, LIN9, NCOA1, PPARG, RAF1, RPS6KA5, SELL, SHC1	12
	Protein Synthesis	quantity of cytokine	0.000947	0.0482	AKT2, NCOA1, NMU, PPARG, PRKCE, RAI1, RPS6KA5, SELE	8
	Lipid Metabolism, Small Molecule Biochemistry, Energy Production	accumulation of lipid droplets	0.00101	0.0484	NCOA1, PEMT, PPARG	3
	Metabolic Disease, Connective Tissue Disorders	lipodystrophy	0.00101	0.0484	AKT2, PCK1, PPARG	3
	Psychological Disorders, Neurological Disease	bipolar disorder	0.00101	0.0484	CLOCK, COX5A, DIABLO, DLAT, NCAN, PPARG, SCN3A, SCN9A, SYN2	9
	Organismal Injury and Abnormalities, Renal and Urological Disease	mesangiolysis	0.00103	0.0484	BCL2, EHD4	2
	Tissue Morphology, Connective Tissue Development and Function	quantity of brown adipocytes	0.00103	0.0484	PCK1, PPARG	2
	Organismal Survival	perinatal death	0.00109	0.0498	ABCA1, AKT2, ARID5B, CADPS2, CYP1A2, DNM3, HSD17B4, PLXND1, PRRX2, RAF1, ROBO1, SCN9A, SH3GL2, SOX5	14
	Metabolic Disease, Endocrine System Disorders, Gastrointestinal Disease	hyperinsulinism	0.00111	0.0498	AKT2, NMU, PCK1, PPARG	4
	Tissue Morphology, Hematological System Development and Function, Hematopoiesis, Humoral Immune Response	quantity of pro-B lymphocytes	0.00111	0.0498	ARID5B, BCL2, MEIS1, RAF1	4
	Organ Morphology	ulceration of skin	0.00112	0.0498	PLCB3, PRKCE, SELE	3
