# Supplementary material for: The Influence of Age and Sex on Genetic Associations with Adult Body Size and Shape: A Large-Scale Genome-Wide Interaction Study
Source: PLoS Genet. 2015 Oct 1;11(10):e1005378. doi: 10.1371/journal.pgen.1005378 (PMC4591371; doi:10.1371/journal.pgen.1005378)
Supplement: S26 Table — Functions that remain significant after B-H correction are marked in bold. (XLSX) [file pgen.1005378.s042.xlsx]

## Sheet: Table S26_IPA_WHR_Men_Fun
	Category	Diseases or Functions Annotation	p-Value	B-H P-Value	Molecules	# Molecules
	Nervous System Development and Function	morphology of central nervous system	4.66e-07	0.00129	ASTN1, BAG6, BCL2L11, CNTNAP2, DSCAM, EPB41L1, ITGB8, LRRTM4, MAPK8IP3, MMP24, MYCBP2, NCOA6, NFATC2, PTPN9, ROBO1, TNF	16
	Nervous System Development and Function, Organ Morphology, Organismal Development	morphology of brain	4.04e-06	0.00557	ASTN1, BAG6, BCL2L11, CNTNAP2, DSCAM, EPB41L1, ITGB8, LRRTM4, MAPK8IP3, MYCBP2, NCOA6, PTPN9, ROBO1, TNF	14
	Nervous System Development and Function, Organ Morphology, Organismal Development	abnormal morphology of brain	1.25e-05	0.0102	ASTN1, BAG6, BCL2L11, CNTNAP2, EPB41L1, ITGB8, LRRTM4, MAPK8IP3, MYCBP2, NCOA6, PTPN9, ROBO1, TNF	13
	Cardiovascular System Development and Function, Cellular Movement	migration of endothelial cells	1.48e-05	0.0102	CDH13, COL4A1, COL4A2, IGFBP3, PLXNA1, PRKCA, ROBO1, SEMA6D, TNF	9
	Cellular Movement, Embryonic Development	migration of mesenchymal cells	1.87e-05	0.0103	GDF5, PLXNA1, SEMA6D	3
	Embryonic Development, Tissue Morphology	structural integrity of Reichert's membrane	2.98e-05	0.0137	COL4A1, COL4A2	2
	Nervous System Development and Function	abnormal morphology of nervous system	5.06e-05	0.0199	ASTN1, BAG6, BCL2L11, CNTNAP2, DSCAM, EPB41L1, ITGB8, LRRTM4, MAPK8IP3, MMP24, MYCBP2, NCOA6, NFATC2, PTPN9, ROBO1, TNF	16
	Cancer, Organismal Injury and Abnormalities, Reproductive System Disease	female genital tract cancer	6.19e-05	0.021	ABCA13, ADAMTSL3, ANKFY1, AP3D1, AP4E1, BAG6, CACNA1C, CDH13, CNTNAP2, COL4A1, COLEC12, CTNND2, DOT1L, DSCAM, DYSF, EXOC6, EYA2, FGFR4, GPR98, IGFBP3, ITGB8, JAZF1, KLHL29, KRT20, LDB2, LEMD3, mir-148, MMP24, MYCBP2, NCOA6, NSD1, PI4KA, PLXNA1, PRKCA, PTPRE, ROBO1, SEMA6D, TNC, TNF, WWP2	40
	Nervous System Development and Function, Organ Morphology, Organismal Development	abnormal morphology of telencephalon	7.93e-05	0.021	BAG6, CNTNAP2, MAPK8IP3, MYCBP2, NCOA6, PTPN9, ROBO1	7
	Neurological Disease	porencephaly	8.89e-05	0.021	COL4A1, COL4A2	2
	Tissue Morphology	structural integrity of basement membrane	8.89e-05	0.021	COL4A1, COL4A2	2
	Cancer	breast or ovarian cancer	0.000101	0.021	ADAMTSL3, ATAD2B, CEP250, COL4A1, DOT1L, DSCAM, EYA2, FGFR4, GGT7, GPR98, IGFBP3, KLHL29, KRT20, mir-148, MMP24, MYCBP2, NFATC2, PTPRE, RGS1, ROBO1, TNC, TNF, TRAIP, WWOX, WWP2	25
	Cancer	solid tumor	0.000101	0.021	ABCA13, ADAMTSL3, AFAP1L1, ANKFY1, AP3D1, AP4E1, ASTN1, ATAD2B, BAG6, CACNA1C, CDH13, CEP250, CNTNAP2, COL4A2, COLEC12, CPZ, CTNND2, DOT1L, DSCAM, DYSF, EXOC6, FGFR4, GDF5, GGT7, GPC5, GPC6, GPR98, GSS, HIVEP2, HLA-DRA, IGFBP3, ITGB8, KLHL29, KRT20, LBP, LDB2, LEMD3, LRRTM4, MACROD2, mir-148, MMP24, MSRB3, MYCBP2, MYH7B, MYO5A, NCOA6, NFATC2, NKAIN3, NMNAT2, NSD1, PCCA, PI4KA, PLXNA1, PRKCA, PTPN…	68
	Organismal Injury and Abnormalities	intracranial hemorrhage	0.000112	0.021	CACNA1C, COL4A1, COL4A2, ITGB8, PTPN9, TNF	6
	Cancer	melanoma	0.000114	0.021	ABCA13, ADAMTSL3, ANKFY1, ARHGAP18, ASTN1, BAG6, C2orf44, C6orf165, CACNA1C, CDH13, CEP250, CNTNAP2, COL4A1, COL4A2, COLEC12, CPZ, CTNND2, DOT1L, DSCAM, DYSF, EXOC6, EYA2, FGFR4, GDF5, GPC5, GPR98, HIVEP2, HLA-DRA, ITGB8, KRT20, LBP, LDB2, MACROD2, MSRB3, MYCBP2, MYH7B, NCOA6, NFATC2, NMNAT2, NSD1, PIGU, PLA2G2C, PLXNA1, PRKCA, PRRC2A, PTPN9, PTPRE, RBM6, RFT1, RGS1, ROBO1, SEMA6D, SGCZ, SLC14A2,…	65
	Cancer	carcinoma	0.000159	0.0262	ABCA13, ADAMTSL3, ANKFY1, AP3D1, AP4E1, ASTN1, ATAD2B, BAG6, CACNA1C, CDH13, CEP250, CNTNAP2, COL4A2, COLEC12, CPZ, CTNND2, DOT1L, DSCAM, DYSF, EXOC6, FGFR4, GDF5, GGT7, GPC5, GPC6, GPR98, GSS, HIVEP2, HLA-DRA, IGFBP3, ITGB8, KLHL29, KRT20, LBP, LDB2, LEMD3, LRRTM4, MACROD2, mir-148, MMP24, MSRB3, MYCBP2, MYH7B, MYO5A, NCOA6, NFATC2, NKAIN3, NMNAT2, NSD1, PCCA, PI4KA, PLXNA1, PRKCA, PTPN9, PTPRE,…	67
	Cell-To-Cell Signaling and Interaction	association of connective tissue cells	0.000177	0.0262	IGFBP3, PTPRE	2
	Cell-mediated Immune Response, Cellular Development, Cellular Function and Maintenance, Hematological System Development and Function, Hematopoiesis, Lymphoid Tissue Structure and Development	differentiation of peripheral T lymphocyte	0.000177	0.0262	HIVEP2, TNF	2
	Organismal Injury and Abnormalities, Neurological Disease, Psychological Disorders	cerebral hemorrhage	0.000188	0.0262	COL4A1, COL4A2, ITGB8, TNF	4
	Cancer	breast or colorectal cancer	0.000199	0.0262	ABCA13, ASTN1, ATAD2B, CACNA1C, CDH13, CEP250, CNTNAP2, COL4A1, COL4A2, COLEC12, CPZ, DOT1L, DSCAM, DYSF, EYA2, FGFR4, GGT7, GPR98, GSS, HIVEP2, HLA-DOA, IGFBP3, KRT20, LBP, LEMD3, MACROD2, mir-148, MMP24, MSRB3, MYCBP2, MYH7B, MYO5A, NCOA6, NFATC2, NSD1, PRKCA, PTPN9, PTPRE, RGS1, ROBO1, SLC14A2, TNC, TNF, TRAIP, VANGL1, WWOX, WWP2	47
	Cell-mediated Immune Response, Cellular Development, Cellular Function and Maintenance, Hematological System Development and Function, Hematopoiesis, Lymphoid Tissue Structure and Development	differentiation of T lymphocytes	0.0002	0.0262	AP3D1, BCL2L11, HIVEP2, HLA-DOA, ITGB8, NFATC2, PRKCA, PTPN9, TNF	9
	Cancer	head and neck tumor	0.000242	0.0291	CACNA1C, CDH13, CNTNAP2, COL4A1, COL4A2, FGFR4, GDF5, GPC6, GSS, IGFBP3, ITGB8, MYCBP2, PRKCA, TNC, WIF1, WWOX	16
	Cancer	epithelial neoplasia	0.000243	0.0291	ABCA13, ADAMTSL3, ANKFY1, AP3D1, AP4E1, ASTN1, ATAD2B, BAG6, CACNA1C, CDH13, CEP250, CNTNAP2, COL4A1, COL4A2, COLEC12, CPZ, CTNND2, DOT1L, DSCAM, DYSF, EXOC6, FGFR4, GDF5, GGT7, GPC5, GPC6, GPR98, GSS, HIVEP2, HLA-DRA, IGFBP3, ITGB8, KLHL29, KRT20, LBP, LDB2, LEMD3, LRRTM4, MACROD2, mir-148, MMP24, MSRB3, MYCBP2, MYH7B, MYO5A, NCOA6, NFATC2, NKAIN3, NMNAT2, NSD1, PCCA, PI4KA, PLXNA1, PRKCA, PTPN9…	68
	Cancer, Organismal Injury and Abnormalities, Reproductive System Disease	mammary tumor	0.000288	0.0331	ATAD2B, CEP250, DOT1L, DSCAM, FGFR4, GGT7, GPR98, IGFBP3, KRT20, mir-148, MMP24, MYCBP2, NCOA6, NFATC2, PTPRE, RGS1, ROBO1, TNC, TNF, TRAIP, WWOX, WWP2	22
	Cancer	pelvic cancer	0.000375	0.0406	ABCA13, ADAMTSL3, ANKFY1, AP3D1, AP4E1, BAG6, CACNA1C, CDH13, CNTNAP2, COL4A1, COLEC12, CTNND2, DOT1L, DSCAM, DYSF, EXOC6, EYA2, FGFR4, GPR98, IGFBP3, ITGB8, JAZF1, KLHL29, KRT20, LDB2, LEMD3, mir-148, MMP24, MYCBP2, NCOA6, NSD1, PI4KA, PLXNA1, PRKCA, PTPRE, ROBO1, SEMA6D, TNC, TNF, WIF1, WWP2	41
	Cancer, Organismal Injury and Abnormalities, Reproductive System Disease	breast cancer	0.000383	0.0406	ATAD2B, CEP250, DOT1L, DSCAM, FGFR4, GGT7, GPR98, IGFBP3, KRT20, mir-148, MMP24, MYCBP2, NFATC2, PTPRE, RGS1, ROBO1, TNC, TNF, TRAIP, WWOX, WWP2	21
	Cell Death and Survival	anoikis of lung cancer cell lines	0.00044	0.0426	COL4A1, COL4A2	2
	Cell-To-Cell Signaling and Interaction, Tissue Development	detachment of cells	0.000446	0.0426	BCL2L11, CDH13, IGFBP3, TNF	4
	Cancer	Cancer	0.000459	0.0426	ABCA13, ADAMTSL3, AFAP1L1, ANKFY1, AP3D1, AP4E1, ARHGAP18, ASTN1, ATAD2B, BAG6, BCL2L11, C2orf44, C6orf165, CACNA1C, CDH13, CEP250, CNTNAP2, COL4A1, COL4A2, COLEC12, CPZ, CTNND2, DOT1L, DSCAM, DYSF, EXOC6, EYA2, FGFR4, GDF5, GGT7, GPC5, GPC6, GPR98, GSS, HIVEP2, HLA-DOA, HLA-DRA, IGFBP3, ITGB8, JAZF1, KLHL29, KRT20, LBP, LDB2, LEMD3, LRRTM4, MACROD2, mir-148, MMP24, MSRB3, MYCBP2, MYH7B, MYO5A, N…	89
	Cell-To-Cell Signaling and Interaction, Hematological System Development and Function, Immune Cell Trafficking, Inflammatory Response	activation of leukocytes	0.000463	0.0426	AP3D1, BCL2L11, HLA-DOA, HLA-DRA, ITCH, LBP, NFATC2, PRKCA, PTPRE, TNC, TNF	11
	Nervous System Development and Function, Organ Morphology, Organismal Development	abnormal morphology of cerebral ventricles	0.000481	0.0428	ITGB8, MAPK8IP3, MYCBP2, NCOA6, PTPN9	5
	Metabolic Disease	glucose metabolism disorder	0.000503	0.043	BAG6, BCL2L11, CACNA1C, CNTNAP2, COL4A1, EYA2, HLA-DOA, HLA-DRA, IGFBP3, JAZF1, LBP, mir-148, NCF2, PRKCA, PRRC2A, RGS1, SGCZ, TNF, WWOX	19
	Organismal Development	abnormal morphology of head	0.000515	0.043	ASTN1, BAG6, BCL2L11, CNTNAP2, DSCAM, EPB41L1, ITGB8, LRRTM4, MAPK8IP3, MYCBP2, NCOA6, NFATC2, PTPN9, ROBO1, TNF	15
	Cell Death and Survival	killing of tumor cell lines	0.00053	0.043	BAG6, BCL2L11, PRKCA, TNF	4
	Cancer, Organismal Injury and Abnormalities, Reproductive System Disease	uterine cancer	0.000553	0.0436	ABCA13, ANKFY1, AP3D1, AP4E1, BAG6, CACNA1C, CDH13, CNTNAP2, COLEC12, CTNND2, DOT1L, DSCAM, DYSF, EXOC6, FGFR4, GPR98, ITGB8, JAZF1, KRT20, LDB2, LEMD3, mir-148, MMP24, MYCBP2, NCOA6, NSD1, PI4KA, PLXNA1, PRKCA, PTPRE, ROBO1, SEMA6D, TNC, TNF, WWP2	35
	Cell Signaling, Vitamin and Mineral Metabolism	loading of Ca2+	0.000614	0.047	PRKCA, TNF	2
	Nervous System Development and Function, Organ Morphology, Organismal Development	abnormal morphology of thalamus	0.000643	0.0475	MAPK8IP3, MYCBP2, NCOA6	3
	Cancer, Organismal Injury and Abnormalities, Reproductive System Disease	carcinoma in breast	0.000655	0.0475	ATAD2B, CEP250, DOT1L, DSCAM, FGFR4, GGT7, GPR98, IGFBP3, mir-148, MYCBP2, PTPRE, TRAIP, WWOX, WWP2	14
