# Supplementary material for: The Influence of Age and Sex on Genetic Associations with Adult Body Size and Shape: A Large-Scale Genome-Wide Interaction Study
Source: PLoS Genet. 2015 Oct 1;11(10):e1005378. doi: 10.1371/journal.pgen.1005378 (PMC4591371; doi:10.1371/journal.pgen.1005378)
Supplement: S27 Table — (XLSX) [file pgen.1005378.s043.xlsx]

## Sheet: Table S27 - Heritability
	Groups	BMI								WHRadjBMI
		GCTA analysisa				SOLAR analysisb				GCTA analysisa				SOLAR analysisb
		N	Variance	SE		N	H2	SE		N	Variance	SE		N	H2	SE
	ALL	29232	0.208812	0.0258747		1758	0.52	0.05		28080	0.0966408	0.0210763		1756	0.29	0.05
	Men and Women £ 50 yrs	13489	0.280559	0.0557688		715	0.6	0.09		13051	0.125458	0.0419363		714	0.33	0.09
	Men and Women > 50 yrs	16039	0.198241	0.045122		1043	0.45	0.09		15325	0.0845887	0.0391763		1042	0.24	0.07
	All Men	13904	0.181571	0.0538765		852	0.72	0.08		13413	0.13198	0.0557527		851	0.38	0.09
	All Women	15589	0.230239	0.0475799		906	0.53	0.08		14928	0.0788418	0.0496389		905	0.43	0.08
	a The genetic variance component explained by all the autosomal SNPs for each trait (BMI and WHRadjBMI adjusted for age and age2 (and BMI) and then inverse normally transformed) was estimated in the ARIC, COLAUS and KORA3/4 cohorts and meta-analysed, using the method proposed by Yang et al [40] and implemented in the Genome-wide Complex Trait Analysis software package (GCTA http://www.complextrai…
	b Heritibility was estimated using the Family Heart Study (FHS) and was analyzed using SOLAR. BMI and WHRadjBMI were adjusted for age, age2, genotyping chips (Illumina 560K, 1,000,000K and 610K), 10 principal components, and 3 study centers. BMI and WHRadjBMI were inverse normally transformed.
