# Supplementary material for: The Influence of Age and Sex on Genetic Associations with Adult Body Size and Shape: A Large-Scale Genome-Wide Interaction Study
Source: PLoS Genet. 2015 Oct 1;11(10):e1005378. doi: 10.1371/journal.pgen.1005378 (PMC4591371; doi:10.1371/journal.pgen.1005378)
Supplement: S29 Table — (XLSX) [file pgen.1005378.s045.xlsx]

## Sheet: ST 29 - Main effects (WHR)
								Alleles			Shungin et al					AGE x SEX
	rsID	LocusID*	Nearest Gene	Other Nearby Genes/Elements	Chr	Pos	SnpTag**	Effect	Other		EAF	β	P	N		EAF	βOverall	POverall	NOverall	P4df	Psexdiff	Pagediff	Pagesexdiff
	Novel Loci
	rs2300481	1	MEIS1	MEIS1-AS3; MIR4778	2	66635971	4df	T	C		0.3951	0.0182	5.245e-05	131778		0.395381	0.0210435	9.66046e-08	149850	4.52719e-08	0.0118718	0.14594	0.0707035
	rs2860517	2	ETAA1	LOC644838	2	67603178	Overall	T	C		0.4031	0.0222	2.433e-07	142707		0.404882	0.0216238	8.02181e-09	159577	4.21583e-07	0.250209	0.389037	0.97421
	rs11947381	3	HHIP	HHIP-AS1; GYPA; ANAPC10; ABCE1	4	145757300	Overall	T	C		0.4586	0.0173	5.201e-07	209796		0.46308	0.0186737	2.11588e-08	206381	2.38743e-06	0.988264	0.711658	0.907471
	rs668459	4	CITED2	ABRACL; HECA; TXLNB; LOC645434; LOC100132735	6	139877382	Overall	T	C		0.5735	-0.0174	5.971e-07	198266		0.574703	-0.0196189	6.2028e-09	195276	6.33169e-08	0.0290566	0.366816	0.67973
	rs4721902	5	ITGB8	MACC1; MACC1-AS1; ABCB5; SP8; RPL23P8	7	20386676	Overall	T	C		0.6114	-0.02	5.482e-06	141572		0.607172	-0.021386	3.40341e-08	160401	7.24054e-07	0.0933519	0.376972	0.730753
	rs4727695	6	LAMB1	COG5; GPR22; DUS4L; BCAP29; SLC26A4-AS1; SLC26A4; CBLL1; SLC26A3; DLD; LAMB4; NRCAM; PNPLA8	7	107401239	Overall	A	G		0.9101	0.0296	5.727e-07	210045		0.908759	0.0330307	1.79345e-08	196450	1.68435e-06	0.873128	0.473919	0.81543
	rs38902	7	WNT2	MET; CAPZA2; ST7-AS1; ST7; ST7-OT4; ST7-AS2; ST7-OT3; ASZ1; CFTR; CTTNBP2	7	116676954	Overall	A	G		0.5161	0.022	3.116e-07	142638		0.515765	0.0218868	5.27774e-09	157723	3.13129e-07	0.995431	0.553941	0.23416
	rs7081678	8	ARHGAP12	ZEB1-AS1; ZEB1; KIF5B	10	32030629	Overall	A	G		0.0788	0.0441	1.077e-07	137927		0.0793309	0.0416596	1.93074e-08	151404	1.82146e-06	0.807201	0.646868	0.59195
	rs1061093	9	EEF1G	INCENP; SCGB1D1; SCGB2A1; SCGB1D2; SCGB2A2; SCGB1D4; ASRGL1; SCGB1A1; AHNAK; MIR3654; TUT1; MTA2; EML3; ROM1; B3GAT3; GANAB; INTS5; C11orf48; METTL12; SNORA57; C11orf83; UBXN1; LRRN4CL; BSCL2; HNRNPUL2-BSCL2; GNG3; TTC9C; ZBTB3; POLR2G; TAF6L; TMEM179B; TMEM223; NXF1; STX5; WDR74; SNHG1; SNORD22; SNORD31	11	62091484	Overall	C	G		0.3481	0.0212	4.564e-05	106776		0.347174	0.0232261	1.49301e-08	153849	9.76723e-08	0.294761	0.815427	0.0235968
	rs11072405	10	NEO1	BBS4; ADPGK; ADPGK-AS1; HCN4; C15orf60; NPTN	15	71272213	Overall	A	G		0.5667	0.0173	5.74e-05	142488		0.564379	0.0211568	1.34703e-08	161068	5.31495e-07	0.561909	0.504449	0.190797
	Rediscovered Loci
	rs2645294	11			1	119376110	4df;Overall;Shungin	T	C		0.5797	0.0312	1.689e-19	209808		0.577416	0.0344508	1.96263e-25	210573	1.30331e-23	0.084055	0.661546	0.173694
	rs905938	12			1	153258013	4df;Overall;Shungin	T	C		0.7427	0.0249	7.335e-10	207867		0.73431	0.0249012	4.38634e-10	200658	1.0038e-08	0.042505	0.902825	0.664168
	rs10919388	13			1	168639127	4df;Overall;Shungin	A	C		0.2774	-0.0239	3.183e-09	181049		0.277857	-0.0248546	6.58349e-11	188461	1.34047e-10	0.00376009	0.268434	0.693666
	rs714515	14			1	170619613	4df;Overall;Shungin	A	G		0.5715	-0.027	4.379e-15	203401		0.573761	-0.027177	2.68976e-16	202984	5.62603e-14	0.343498	0.867365	0.62864
	rs2605101	15			1	217711119	Overall	A	T		0.6734	0.0389	5.407e-18	142719		0.67633	0.0377836	1.22362e-21	160675	8.15216e-27	6.34039e-10	0.362875	0.970622
	rs2820443	15			1	217820132	4df;Shungin	T	C		0.7167	0.0349	5.259e-21	209975		0.715263	0.0330821	9.5061e-20	205471	4.24026e-33	1.08625e-18	0.401667	0.603228
	rs1385167	16			2	66054152	Shungin	A	G		0.852	-0.029	1.85e-09	206619		0.85474	-0.0282239	4.66879e-09	198693	1.17507e-07	0.217237	0.189892	0.44894
	rs10210513	16			2	66065293	4df;Overall	A	G		0.8545	-0.0295	2.076e-09	206724		0.855921	-0.0296217	3.85031e-10	207394	1.1728e-08	0.184094	0.268071	0.403332
	rs10195252	17			2	165221337	4df;Overall;Shungin	T	C		0.5926	0.027	5.868e-15	209395		0.590334	0.026324	6.08838e-15	199318	4.12247e-30	3.11612e-20	0.180862	0.583756
	rs13424740	18			2	187791368	4df;Overall	T	C		0.53	0.0206	1.112e-09	209929		0.529034	0.0229262	1.68853e-12	208105	1.15027e-10	0.725981	0.419647	0.176835
	rs1569135	18			2	187823643	Shungin	A	G		0.53	0.021	5.61e-10	209906		0.527804	0.0229728	3.24328e-12	204345	1.25499e-10	0.52367	0.348537	0.119366
	rs2972164	19			3	12309416	Overall	T	C		0.4637	-0.0197	9.432e-09	208909		0.460702	-0.0184056	2.01653e-08	206437	7.78971e-07	0.249898	0.334024	0.610917
	rs17819328	19			3	12464342	4df;Shungin	T	G		0.5683	-0.0208	2.43e-09	208809		0.568867	-0.0184192	1.2732e-07	198276	8.6962e-09	7.87826e-05	0.914582	0.442497
	rs1060330	20			3	52263985	Overall	T	C		0.4963	0.0177	2.547e-07	209468		0.494156	0.0180985	2.91639e-08	208271	1.66967e-06	0.347836	0.525272	0.577069
	rs12489828	20			3	52542054	4df	T	G		0.5488	-0.0227	7.114e-11	204485		0.54942	-0.0220195	2.28695e-11	205755	4.12189e-10	0.0888393	0.22996	0.340976
	rs2276824	20			3	52612526	Shungin	C	G		0.434	0.024	3.17e-11	208901		0.432943	0.0225078	3.1747e-11	210017	3.6262e-09	0.370585	0.979191	0.547559
	rs2710323	20			3	52790945	Overall	T	C		0.5093	0.0226	4.875e-11	209600		0.508618	0.0227398	6.9758e-12	203801	6.39007e-10	0.326447	0.347067	0.860459
	rs9860730	21			3	64676186	4df	A	G		0.7026	0.0352	3.446e-21	209960		0.703136	0.0308713	5.13957e-18	207384	4.47758e-22	1.25923e-08	0.501215	0.679271
	rs4504165	21			3	64676930	Overall	T	C		0.7033	0.036	3.582e-18	169259		0.703113	0.0328825	4.86741e-18	184647	2.84994e-21	7.61463e-08	0.870321	0.868841
	rs2371767	21			3	64693298	Shungin	C	G		0.276	-0.036	1.59e-20	194506		0.278563	-0.0314991	5.72958e-17	198090	3.05585e-21	9.505e-09	0.329268	0.705068
	rs10804591	22			3	130816923	4df;Overall;Shungin	A	C		0.795	0.0245	6.565e-09	209921		0.793416	0.0233045	9.85479e-09	207011	1.67049e-12	8.12931e-08	0.342671	0.943159
	rs17451107	23			3	158280303	Shungin	T	C		0.615	0.026	1.14e-12	207795		0.611674	0.0256469	2.36222e-13	202582	1.05568e-11	0.144077	0.388031	0.344853
	rs1482852	23			3	158280988	4df;Overall	A	G		0.5973	0.0251	6.508e-12	196719		0.597303	0.0261419	5.81186e-14	198342	3.87128e-12	0.117141	0.678835	0.493574
	rs13132420	24			4	56087570	4df	A	G		0.3267	-0.0157	0.0006424	141812		0.326424	-0.0113574	0.00690514	153185	2.12139e-08	2.08567e-06	0.000413471	0.29727
	rs3805389	24			4	56177507	Shungin	A	G		0.278	0.012	0.00147	209218		0.278104	0.00655059	0.0798746	199506	1.91499e-06	1.13253e-06	0.511739	0.0153274
	rs9991328	25			4	89932144	4df;Overall;Shungin	T	C		0.4882	0.0185	4.452e-08	209925		0.485312	0.0178599	4.62564e-08	204498	2.04091e-08	0.00173791	0.109186	0.946633
	rs303084	26			4	124286398	Overall;Shungin	A	G		0.7961	0.0232	3.884e-08	209941		0.795452	0.0238233	5.24274e-09	207057	7.09021e-08	0.0902275	0.183313	0.488151
	rs459193	27			5	55842508	Overall	A	G		0.2645	0.0259	1.577e-11	209952		0.263207	0.0229805	5.96355e-10	210082	2.12803e-08	0.091375	0.896425	0.513874
	rs3936510	27			5	55896623	4df	T	G		0.1845	0.0262	8.924e-09	207896		0.18286	0.0214884	8.55073e-07	208734	1.08606e-08	0.000128049	0.0332837	0.628884
	rs9687846	27			5	55897651	Shungin	A	G		0.191	0.024	7.11e-08	208181		0.187202	0.018975	8.84516e-06	209716	2.72015e-08	3.48888e-05	0.0333486	0.55951
	rs1045241	28			5	118757185	4df;Shungin	T	C		0.2886	-0.0189	4.412e-07	209710		0.289176	-0.0173078	1.91047e-06	210067	8.64277e-09	3.40139e-06	0.839918	0.763301
	rs7705502	29			5	173253421	Shungin	A	G		0.328	0.027	4.66e-14	209827		0.326143	0.0241569	3.6646e-12	209685	3.38447e-10	0.282903	0.781792	0.414236
	rs10516107	29			5	173280762	4df;Overall	A	G		0.3283	0.0269	7.125e-14	210056		0.326573	0.0240949	2.7077e-12	210066	2.38375e-10	0.292114	0.73853	0.36845
	rs6556301	30			5	176460183	Shungin	T	G		0.357	0.022	2.58e-08	178874		0.355742	0.0200013	7.17318e-08	185141	1.45967e-06	0.131701	0.20928	0.927774
	rs3088050	30			5	176659241	4df	A	G		0.2103	0.0184	1.12e-05	210048		0.20973	0.0215209	1.13259e-07	204365	1.15246e-08	0.00108506	0.0403525	0.456073
	rs1294410	31			6	6683751	4df;Overall;Shungin	T	C		0.3671	-0.0309	2.025e-18	209830		0.366835	-0.0278648	9.62645e-17	210715	9.7977e-16	0.00648194	0.845326	0.577127
	rs4424066	32			6	32462406	Overall	A	G		0.5757	-0.0219	3.154e-10	208645		0.57803	-0.0247643	7.41659e-14	206760	9.60054e-12	0.552112	0.373779	0.491378
	rs7759742	32			6	32489714	4df;Shungin	A	T		0.511	0.0226	4.408e-11	208263		0.509001	0.0245511	8.97408e-14	206963	1.74386e-12	0.106681	0.510221	0.109194
	rs998584	33			6	43865874	4df;Overall	A	C		0.4833	0.0432	1.12e-29	189620		0.48488	0.0386283	6.75331e-26	196710	3.14362e-31	4.97785e-10	0.242163	0.708297
	rs1358980	33			6	43872529	Shungin	T	C		0.466	0.039	3.11e-27	206862		0.471382	0.0369748	1.26508e-24	198917	1.27892e-29	7.34286e-10	0.469809	0.994696
	rs1936805	34			6	127493809	Shungin	T	C		0.511	0.043	3.56e-35	209859		0.512891	0.0436201	2.78671e-40	206092	2.27803e-38	0.0212499	0.428147	0.635261
	rs2745353	34			6	127494628	4df;Overall	T	C		0.511	0.0424	4.481e-35	209874		0.513046	0.0436438	7.21547e-41	210038	4.28283e-39	0.0139028	0.396915	0.719931
	rs4141278	35			7	25824050	Overall	T	C		0.7996	-0.0348	1.266e-15	209965		0.801725	-0.0336339	3.84652e-16	209836	8.66159e-15	0.0265782	0.737801	0.350161
	rs10245353	35			7	25825139	Shungin	A	C		0.2	0.035	8.41e-16	210008		0.197917	0.0333963	6.17681e-16	209807	1.1465e-14	0.0240105	0.732095	0.303812
	rs3902751	35			7	25828164	4df	A	G		0.2501	0.0294	5.631e-14	209969		0.248491	0.0298773	1.8153e-15	209841	1.15569e-15	0.00303153	0.337368	0.0572572
	rs7801581	36			7	27190296	4df;Overall;Shungin	T	C		0.2424	0.0265	3.676e-10	195215		0.24553	0.0282304	6.60527e-12	191158	2.33756e-10	0.41088	0.108325	0.414731
	rs7830933	37			8	23659269	4df;Shungin	A	G		0.7673	0.0217	7.448e-08	209766		0.766228	0.0188932	7.55627e-07	209556	5.4525e-11	4.79397e-08	0.596992	0.37181
	rs12549058	38			8	72654792	Overall	T	G		0.9161	-0.0421	8.022e-11	209895		0.92075	-0.0374287	6.69118e-09	205516	8.33357e-07	0.721245	0.887993	0.985071
	rs12679556	38			8	72676782	Shungin	T	G		0.752	-0.027	2.14e-11	203826		0.753114	-0.0219943	8.26527e-09	202090	3.07118e-07	0.104328	0.943948	0.70746
	rs10991433	39			9	106766739	4df;Overall	T	C		0.89	-0.0317	1.579e-08	206706		0.887124	-0.0365083	7.09572e-12	205426	2.74354e-10	0.127913	0.234915	0.923469
	rs10991437	39			9	106775741	Shungin	A	C		0.114	0.031	1.02e-08	209941		0.116456	0.0340383	9.66779e-11	199432	1.71771e-09	0.108467	0.118038	0.723197
	rs10842707	40			12	26362631	4df;Overall;Shungin	T	C		0.2318	0.0324	4.399e-16	210023		0.23238	0.0347598	1.39632e-19	209854	4.3617e-18	0.0173602	0.803764	0.695334
	rs1443512	41			12	52628951	Shungin	A	C		0.235	0.028	6.94e-13	209980		0.236373	0.0282532	3.61412e-13	203297	6.83911e-13	0.00384383	0.292113	0.280136
	rs10783615	41			12	52636040	4df;Overall	A	G		0.856	-0.0359	3.279e-13	209368		0.855652	-0.0363152	2.97425e-14	209823	1.58883e-14	0.00536596	0.763846	0.0189751
	rs7133378	42			12	122975455	Overall	A	G		0.3168	-0.0287	7.569e-15	207366		0.316149	-0.0273747	1.2781e-14	205855	8.40421e-14	0.0138019	0.28534	0.312053
	rs4765219	42			12	123006063	Shungin	A	C		0.332	-0.028	1.56e-15	209807		0.332935	-0.0260525	8.77357e-14	201354	1.29726e-12	0.0219992	0.420715	0.554291
	rs10773049	42			12	123072584	4df	T	C		0.5967	0.025	8.971e-13	209319		0.600101	0.025268	4.43577e-14	205589	7.3588e-14	0.00141104	0.317949	0.839366
	rs8042543	43			15	29495555	Overall;Shungin	T	C		0.2176	-0.0263	1.159e-09	208255		0.21244	-0.0251532	2.41052e-09	201542	2.01714e-07	0.900208	0.464456	0.429189
	rs8030605	44			15	54291890	Shungin	A	G		0.142	0.03	8.77e-09	208374		0.145953	0.0277685	4.01939e-08	205675	2.896e-06	0.500146	0.722067	0.514164
	rs12595496	44			15	54316098	Overall	A	G		0.8751	-0.0288	3.643e-08	210002		0.875928	-0.0291486	4.40466e-09	209765	1.86312e-07	0.605546	0.687533	0.148497
	rs1440372	45			15	64820205	4df;Overall;Shungin	T	C		0.2903	-0.0244	1.134e-10	207447		0.294481	-0.0230973	2.59226e-10	206081	3.12156e-08	0.929279	0.385828	0.973616
	rs2925979	46			16	80092291	4df;Shungin	T	C		0.306	0.0178	1.223e-06	207828		0.305442	0.01576	1.06236e-05	206787	2.04628e-08	4.73357e-06	0.84318	0.139171
	rs4646404	47			17	17360924	4df;Overall;Shungin	A	G		0.3347	-0.0266	1.362e-11	198196		0.342956	-0.026233	5.48963e-12	201704	2.05622e-10	0.10692	0.269547	0.739963
	rs12608504	48			19	18250135	Overall;Shungin	A	G		0.355	0.0219	8.793e-10	209990		0.357007	0.019688	1.05022e-08	206771	5.13158e-07	0.323965	0.594634	0.35761
	rs4081724	49			19	38516786	Shungin	A	G		0.149	-0.035	7.38e-12	207418		0.141856	-0.0303153	9.3684e-10	203047	1.11036e-07	0.892256	0.560568	0.632638
	rs7258031	49			19	38578194	4df;Overall	T	C		0.3382	0.0241	8.161e-11	202113		0.339356	0.0267535	3.41536e-14	202924	2.79489e-12	0.18906	0.608578	0.401253
	rs979012	50			20	6571374	4df;Overall;Shungin	T	C		0.3425	0.0273	3.339e-14	209941		0.344994	0.0270998	7.08671e-15	206082	1.72524e-12	0.767647	0.576656	0.734644
	rs4911180	51			20	33436362	4df;Overall	A	G		0.6027	0.0202	9.647e-09	207844		0.603049	0.0197083	2.63194e-09	207613	4.07528e-10	0.00221531	0.540425	0.0246166
	rs224333	51			20	33487376	Shungin	A	G		0.378	-0.02	2.57e-08	208025		0.375866	-0.0195625	1.82509e-08	209824	4.18952e-09	0.00364759	0.427591	0.0327314
	rs6012059	52			20	44936621	Overall	A	G		0.3855	0.0271	1.72e-09	139540		0.387353	0.0276852	4.57877e-12	152861	2.54697e-10	0.099224	0.653593	0.841438
	rs1984076	52			20	44946842	4df	A	G		0.4132	0.0251	1.167e-08	141723		0.416832	0.0266409	6.02013e-12	160371	5.87012e-11	0.0136275	0.443259	0.880658
	rs6090583	52			20	44992238	Shungin	A	G		0.48	0.022	6.17e-11	209435		0.477667	0.0190936	1.15018e-08	201706	3.67665e-07	0.221306	0.616834	0.262749
	rs2294239	53			22	27779477	Shungin	A	G		0.587	0.025	7.24e-13	209454		0.585205	0.0266969	2.0575e-15	205386	8.04259e-15	0.111749	0.0089159	0.696913
	rs2179129	53			22	27780923	4df;Overall	A	G		0.5899	0.0246	1.084e-12	209833		0.587757	0.0266488	1.1629e-15	206757	3.13226e-15	0.076203	0.00727776	0.896031
	Missed Loci
	rs1776897				6	34302989	Shungin	T	G		0.919	-0.03	1.12e-05	177879		0.918967	-0.0284908	1.48804e-05	178267	1.88418e-05	0.00575076	0.497868	0.409455
	rs1534696				7	26363764	Shungin	A	C		0.567	-0.011	0.00134	212501		0.560416	-0.0121316	0.000674318	193773	1.29368e-06	2.37642e-05	0.0446079	0.394601
	rs7917772				10	104477433	Shungin	A	G		0.619	0.014	5.64e-05	209642		0.616637	0.0151457	8.17742e-06	204738	5.73554e-07	0.000130931	0.617318	0.516414
	rs11231693				11	63619188	Shungin	A	G		0.061	0.041	4.48e-08	198072		0.0627843	0.0311871	1.97006e-05	194823	3.43931e-06	0.00165117	0.0796333	0.676588
	rs8066985				17	65964940	Shungin	A	G		0.505	0.018	1.43e-07	209977		0.508507	0.0160804	8.62691e-07	207786	3.68552e-07	0.000801357	0.486892	0.704464
	rs12454712				18	58996864	Shungin	T	C		0.609	0.016	0.000102	169793		0.60578	0.0131665	0.00179079	163704	4.32249e-07	4.04824e-05	0.232531	0.004679
	* Column LocusID is a unique locus identifier that can be used to identify SNPs that pertain to the same locus and were selected by different analyses.
	** Column SnpTag lists the analyses, for which the SNP met genome-wide significance and was selected as Top SNP of the region. For some loci, Top SNPs vary by Analysis. Such loci are presented using multiple rows, but with identical LocusID. The values indicate whether the SNP reached genome-wide significance in our joint meta-analysis (4df), in our strata-combined meta-analysis (Overall) or in t…
